# Supplementary material
Source: MDPI journal article supplement (https://www.mdpi.com/1999-4907/14/9/1813)
Supplement: s1 [file s1]

## DROUGHT AND VULNERABILITY IN MEXICO'S FOREST ECOSYSTEMS

### Supplementary Material S1. Annual drought mapping from 2000 to 2020.

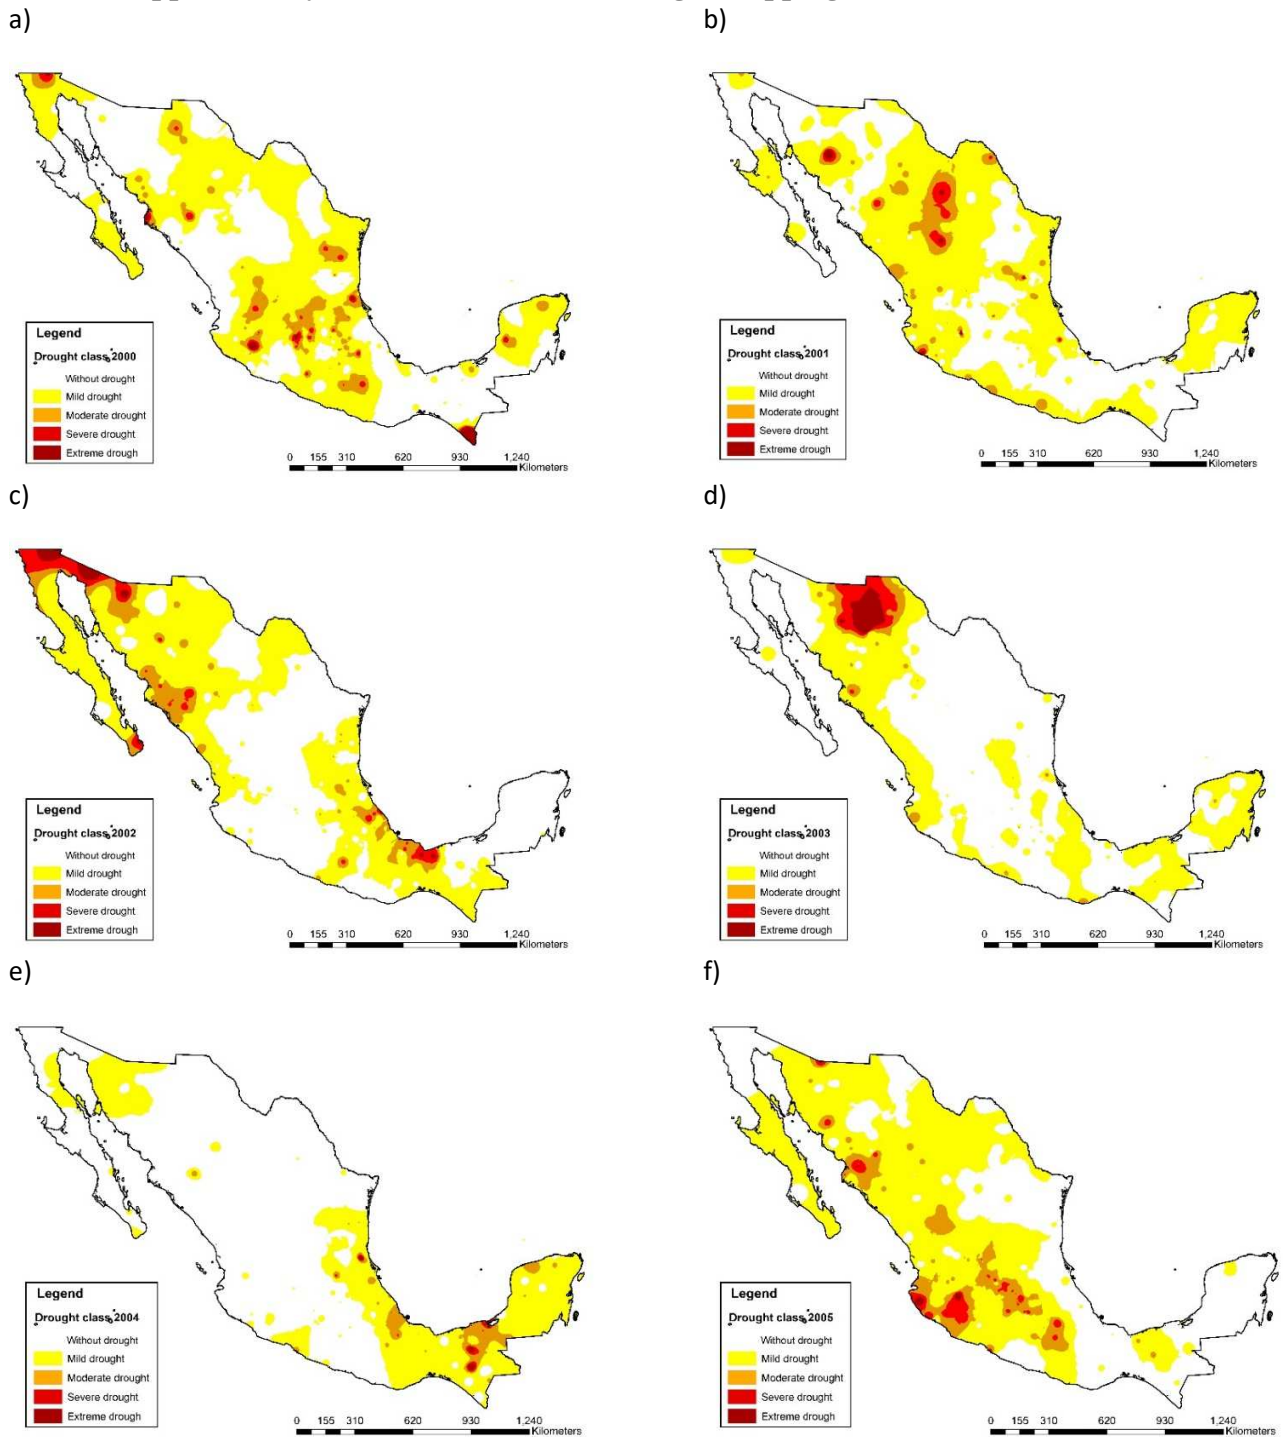

g)

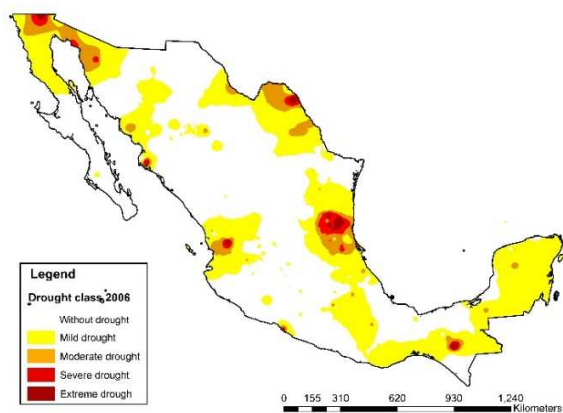

h)

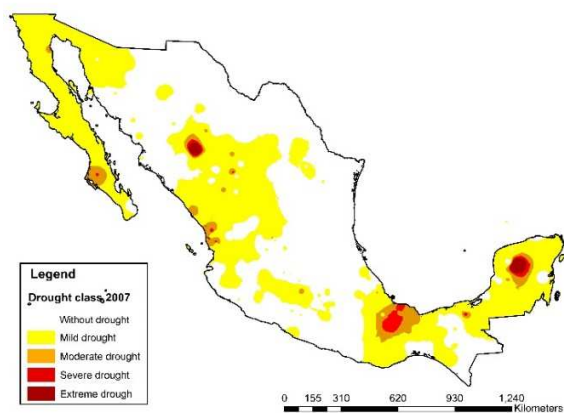

i)

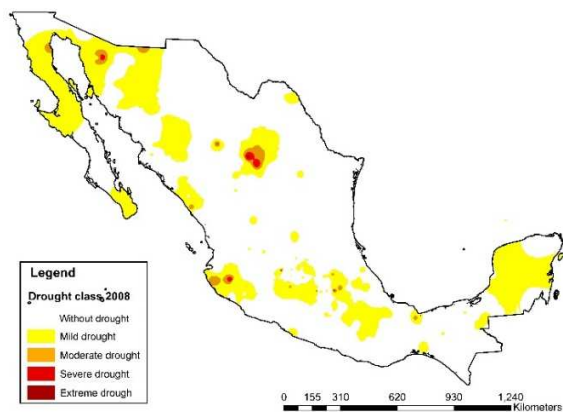

j)

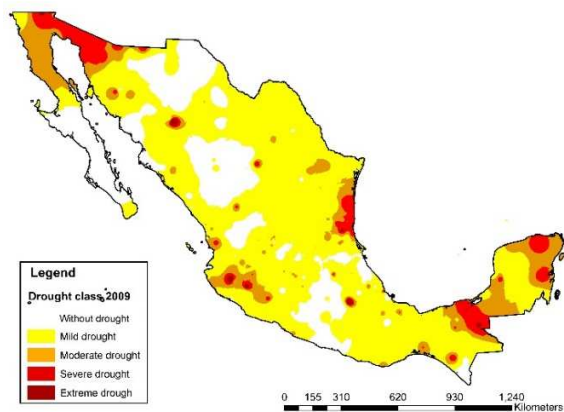

k)

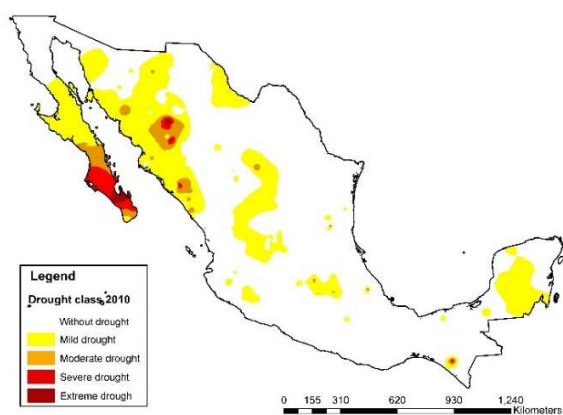

l)

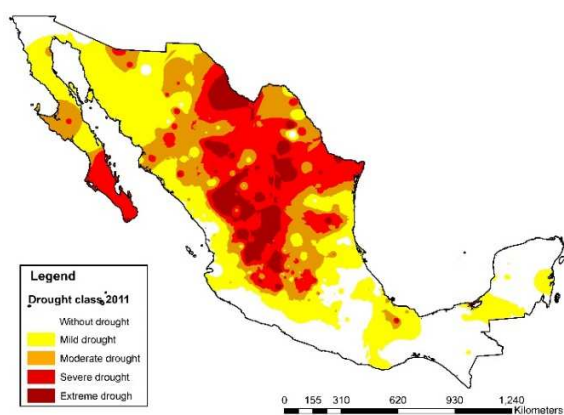

Figure S2. Drought maps for years g) 2006, h) 2007, i) 2008, j) 2009, k) 2010 and l) 2011

m)

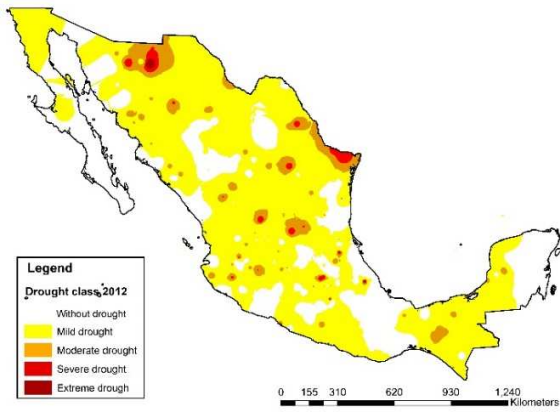

n)

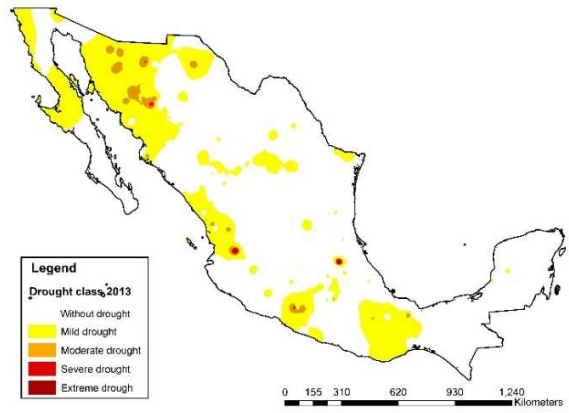

o)

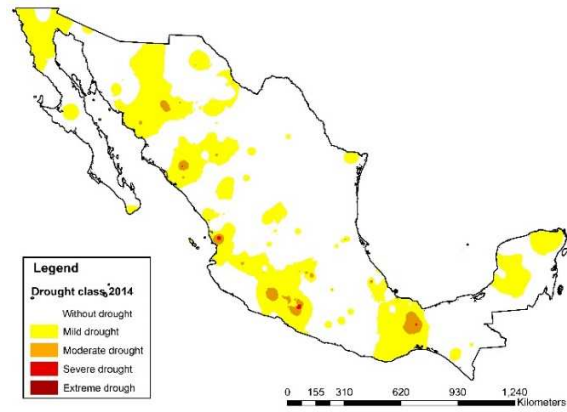

p)

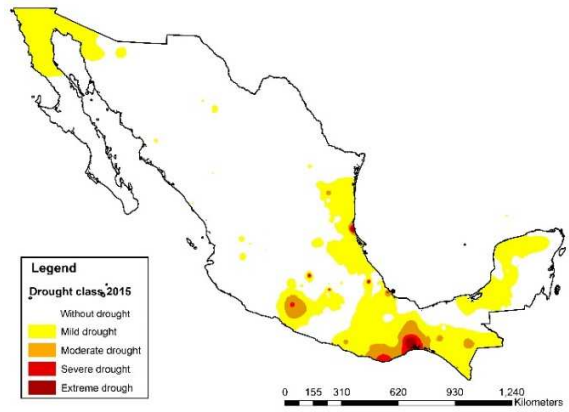

q)

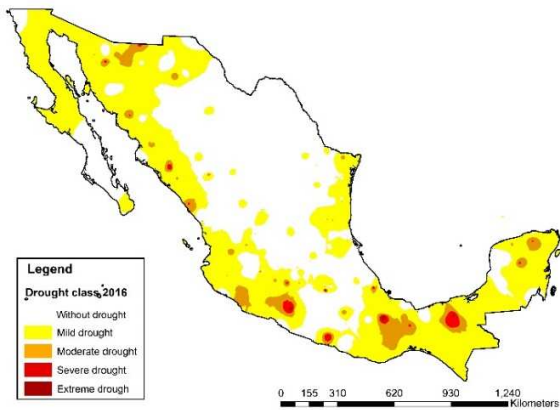

r)

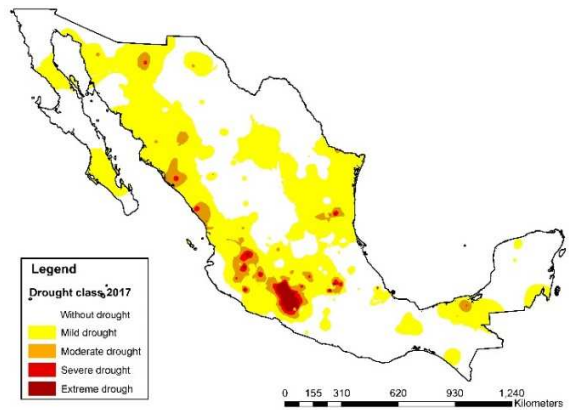

Figure S3. Drought maps for years m) 2012, n) 2013, o) 2014, p) 2015, q) 2016 and r) 2017

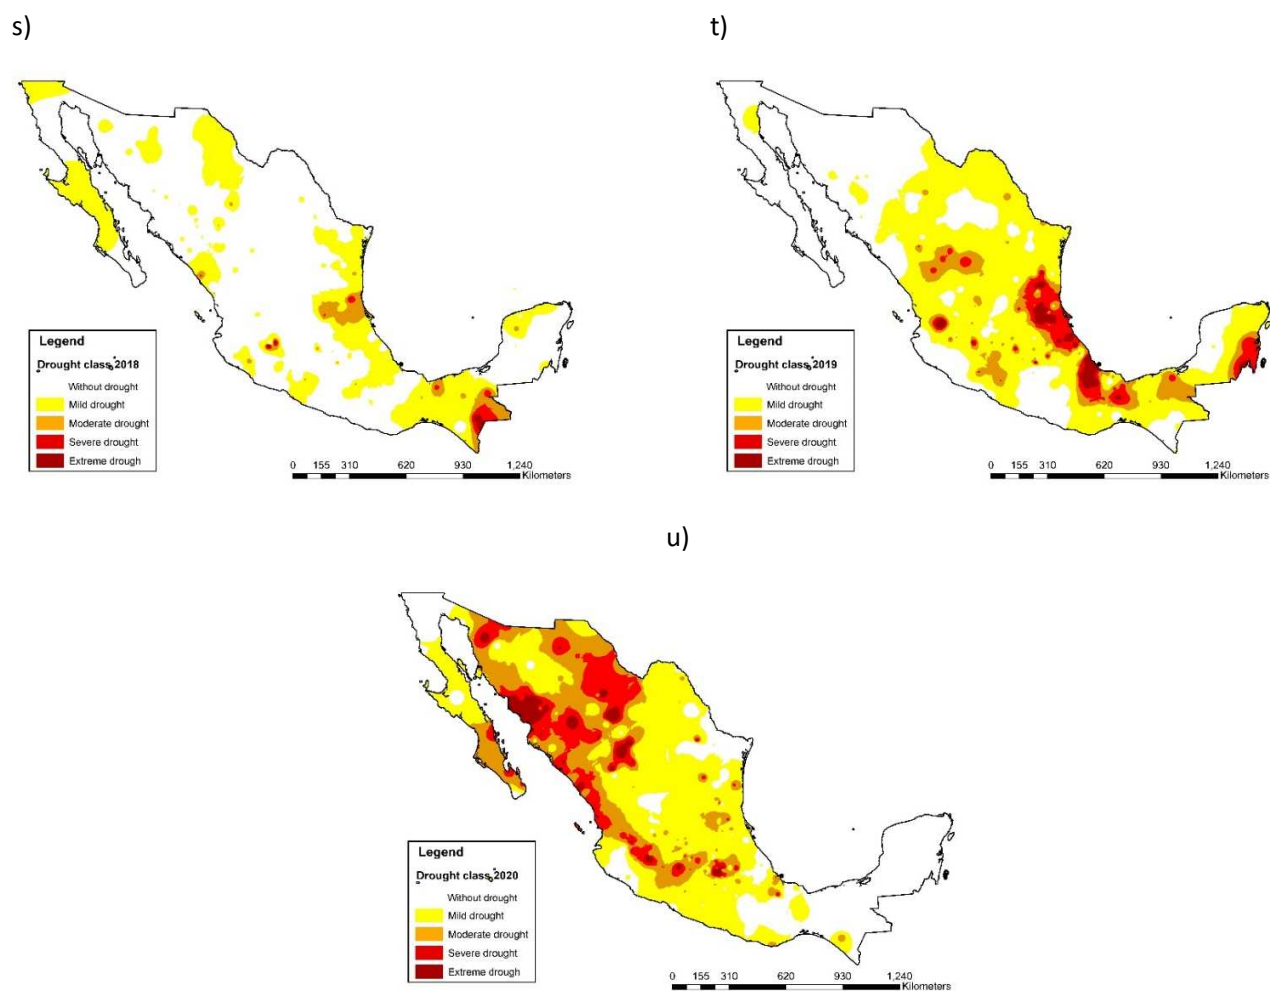

Figure S4. Drought maps for years s) 2018, t) 2019 and u) 2020

## Supplementary Material S2. Statistics of the variables

| Variable                                                                         | Min      | Max      | Mean     | Standard deviation | Source                                                                                                                                                                                                                                                                                                                                                                                 |
|----------------------------------------------------------------------------------|----------|----------|----------|--------------------|----------------------------------------------------------------------------------------------------------------------------------------------------------------------------------------------------------------------------------------------------------------------------------------------------------------------------------------------------------------------------------------|
| Literacy rate (percentage of people over 15 years old)                           | 65%      | 100%     | 92.91%   | 5%                 | Instituto Nacional de Estadística y Geografía ( <a href="https://www.inegi.org.mx/programas/ccpv/2020/">https://www.inegi.org.mx/programas/ccpv/2020/</a> , junio 2022)                                                                                                                                                                                                                |
| Rural population (percentage in municipalities)                                  | 0%       | 100%     | 58%      | 36%                | Instituto Nacional de Estadística y Geografía ( <a href="https://www.inegi.org.mx/programas/ccpv/2020/">https://www.inegi.org.mx/programas/ccpv/2020/</a> , junio 2022)                                                                                                                                                                                                                |
| Life expectancy at birth (in years per municipality)                             | 73.32    | 76.6     | 74.8     | 0.6                | Instituto Nacional de Estadística y Geografía ( <a href="https://www.inegi.org.mx/programas/ccpv/2020/">https://www.inegi.org.mx/programas/ccpv/2020/</a> , junio 2022)                                                                                                                                                                                                                |
| Population aged 15 to 64 (percentage of the municipality)                        | 6%       | 74%      | 61%      | 4%                 | Instituto Nacional de Estadística y Geografía ( <a href="https://www.inegi.org.mx/programas/ccpv/2020/">https://www.inegi.org.mx/programas/ccpv/2020/</a> , junio 2022)                                                                                                                                                                                                                |
| Government effectiveness (dimensionless)                                         | 0.07     | 0.81     | 0.35     | 0.12               | Cid et al., (2020).                                                                                                                                                                                                                                                                                                                                                                    |
| Population below the international poverty line (percentage of the municipality) | 5%       | 100%     | 62%      | 22%                | <a href="https://www.coneval.org.mx/Medicion/Paginas/Pobreza-municipio-2010-2020.aspx">CONEVAL</a> ( <a href="https://www.coneval.org.mx/Medicion/Paginas/Pobreza-municipio-2010-2020.aspx">https://www.coneval.org.mx/Medicion/Paginas/Pobreza-municipio-2010-2020.aspx</a> , julio 2022)                                                                                             |
| Gross Domestic Product per capita                                                | 0.09     | 1.4      | 0.45     | 0.34               | <a href="https://www.inegi.org.mx/app/tabulados/default.aspx?pr=17&amp;vr=7&amp;in=2&amp;tp=20&amp;wr=1&amp;cno=2">INEGI 1980-2021</a> ( <a href="https://www.inegi.org.mx/app/tabulados/default.aspx?pr=17&amp;vr=7&amp;in=2&amp;tp=20&amp;wr=1&amp;cno=2">https://www.inegi.org.mx/app/tabulados/default.aspx?pr=17&amp;vr=7&amp;in=2&amp;tp=20&amp;wr=1&amp;cno=2</a> , julio 2022) |
| Contribution of agriculture to GDP                                               | 1%       | 14%      | 6%       | 3%                 | <a href="https://www.inegi.org.mx/app/tabulados/default.aspx?pr=17&amp;vr=7&amp;in=2&amp;tp=20&amp;wr=1&amp;cno=2">INEGI 1980-2021</a> ( <a href="https://www.inegi.org.mx/app/tabulados/default.aspx?pr=17&amp;vr=7&amp;in=2&amp;tp=20&amp;wr=1&amp;cno=2">https://www.inegi.org.mx/app/tabulados/default.aspx?pr=17&amp;vr=7&amp;in=2&amp;tp=20&amp;wr=1&amp;cno=2</a> , julio 2022) |
| Energy consumption (kilograms of oil equivalent per capita)                      | 1559.119 | 1559.119 | 1559.119 | 0                  | <a href="https://data.worldbank.org/indicator/EG.USE.PCAP.KG.OE">Banco Mundial</a> ( <a href="https://data.worldbank.org/indicator/EG.USE.PCAP.KG.OE">https://data.worldbank.org/indicator/EG.USE.PCAP.KG.OE</a> , julio, 2022).                                                                                                                                                       |

|                                                                              |      |        |         |         |                                                                                                                                                                                                                                                                   |
|------------------------------------------------------------------------------|------|--------|---------|---------|-------------------------------------------------------------------------------------------------------------------------------------------------------------------------------------------------------------------------------------------------------------------|
| Population that has drinking water services (percentage of the municipality) | 0%   | 100%   | 73%     | 21%     | <a href="https://www.inegi.org.mx/programas/ccpv/2020/">Censos de población y vivienda de INEGI para los años 2000, 2005, 2010 y 2020 (https://www.inegi.org.mx/programas/ccpv/2020/ julio, 2022)</a>                                                             |
| Total renewable water resources per capita (m3/inhab/year)                   | 142  | 18375  | 4936.92 | 4375.3  | <a href="https://www.gob.mx/conagua/acciones-y-programas/publicaciones-estadisticas-y-geograficas-60692">CONAGUA en las "Estadísticas del agua" (https://www.gob.mx/conagua/acciones-y-programas/publicaciones-estadisticas-y-geograficas-60692, julio, 2022)</a> |
| Cultivated area equipped with irrigation (percentage of the municipality)    | 0%   | 96.98% | 8.25%   | 15.82%  | <a href="http://www.conabio.gob.mx/informacion/gis/">INEGI (http://www.conabio.gob.mx/informacion/gis/, julio, 2022)</a>                                                                                                                                          |
| Infiltration (hm3/year)                                                      | 1641 | 25316  | 6874.8  | 6463.13 | <a href="https://www.gob.mx/conagua/acciones-y-programas/publicaciones-estadisticas-y-geograficas-60692">CONAGUA (https://www.gob.mx/conagua/acciones-y-programas/publicaciones-estadisticas-y-geograficas-60692, julio, 2022)</a>                                |

**Supplementary Material S3. Value of variables and indices for all municipalities.**

| Estado                 | Municipio                      | VS   | VE   | VI   | IV<br>promedio | IV<br>estandarizado | Clases<br>de IV | ClaseSequía | Factor<br>de<br>efecto | Morans | Clase Final |
|------------------------|--------------------------------|------|------|------|----------------|---------------------|-----------------|-------------|------------------------|--------|-------------|
| Aguascalientes         | Aguascalientes                 | 0.92 | 0.44 | 0.54 | 0.64           | 0.16                | 1               | 4 d         | HL                     |        | 5dHL        |
| Aguascalientes         | Asientos                       | 0.65 | 0.33 | 0.52 | 0.50           | 0.39                | 2               | 3 d         | NS                     |        | 5dNS        |
| Aguascalientes         | Calvillo                       | 0.78 | 0.32 | 0.51 | 0.54           | 0.33                | 1               | 5 d         | NS                     |        | 6dNS        |
| Aguascalientes         | Cosío                          | 0.70 | 0.37 | 0.64 | 0.57           | 0.27                | 1               | 5 d         | NS                     |        | 6dNS        |
| Aguascalientes         | Jesús María<br>Pabellón de     | 0.78 | 0.42 | 0.52 | 0.57           | 0.27                | 1               | 4 d         | HL                     |        | 5dHL        |
| Aguascalientes         | Arteaga                        | 0.81 | 0.39 | 0.64 | 0.61           | 0.20                | 1               | 5 d         | HL                     |        | 6dHL        |
| Aguascalientes         | Rincón de Romos<br>San José de | 0.78 | 0.36 | 0.58 | 0.58           | 0.26                | 1               | 5 d         | HL                     |        | 6dHL        |
| Aguascalientes         | Gracia                         | 0.69 | 0.32 | 0.45 | 0.49           | 0.41                | 2               | 5 d         | HL                     |        | 7dHL        |
| Aguascalientes         | Tepezalá                       | 0.64 | 0.34 | 0.54 | 0.51           | 0.37                | 2               | 5 d         | HL                     |        | 7dHL        |
| Aguascalientes         | El Llano<br>San Francisco de   | 0.59 | 0.33 | 0.47 | 0.46           | 0.45                | 2               | 4 d         | HL                     |        | 6dHL        |
| Aguascalientes         | los Romo                       | 0.78 | 0.40 | 0.60 | 0.59           | 0.23                | 1               | 5 d         | HL                     |        | 6dHL        |
| Baja California        | Ensenada                       | 0.87 | 0.51 | 0.32 | 0.57           | 0.28                | 1               | 3 d         | LL                     |        | 4dLL        |
| Baja California        | Mexicali                       | 0.89 | 0.53 | 0.39 | 0.60           | 0.22                | 1               | 4 d         | HL                     |        | 5dHL        |
| Baja California        | Tecate                         | 0.84 | 0.53 | 0.28 | 0.55           | 0.31                | 1               | 4 d         | HL                     |        | 5dHL        |
| Baja California        | Tijuana                        | 0.87 | 0.52 | 0.33 | 0.57           | 0.27                | 1               | 4 d         | HL                     |        | 5dHL        |
| Baja California        | Playas de Rosarito             | 0.84 | 0.48 | 0.25 | 0.53           | 0.34                | 1               | 4 d         | HL                     |        | 5dHL        |
| Baja California        | San Quintín                    | 0.85 | 0.50 | 0.29 | 0.55           | 0.31                | 1               | 3 d         | LL                     |        | 4dLL        |
| Baja California<br>Sur | Comondú                        | 0.75 | 0.40 | 0.35 | 0.50           | 0.39                | 2               | 4 d         | HL                     |        | 6dHL        |
| Baja California<br>Sur | Mulegé                         | 0.73 | 0.42 | 0.29 | 0.48           | 0.42                | 2               | 3 d         | LL                     |        | 5dLL        |
| Baja California<br>Sur | La Paz                         | 0.91 | 0.46 | 0.33 | 0.56           | 0.28                | 1               | 5 d         | HL                     |        | 6dHL        |
| Baja California<br>Sur | Los Cabos                      | 0.87 | 0.44 | 0.29 | 0.53           | 0.33                | 1               | 4 d         | HL                     |        | 5dHL        |



|                 |                  |      |      |      |      |      |   |     |    |      |
|-----------------|------------------|------|------|------|------|------|---|-----|----|------|
| Baja California |                  |      |      |      |      |      |   |     |    |      |
| Sur             | Loreto           | 0.89 | 0.40 | 0.32 | 0.53 | 0.33 | 1 | 4 d | HL | 5dHL |
| Campeche        | Calkiní          | 0.67 | 0.51 | 0.75 | 0.64 | 0.15 | 1 | 2 d | LL | 3dLL |
| Campeche        | Campeche         | 0.80 | 0.61 | 0.78 | 0.73 | 0.00 | 1 | 4 d | HL | 5dHL |
| Campeche        | Carmen           | 0.69 | 0.61 | 0.69 | 0.66 | 0.12 | 1 | 3 d | LL | 4dLL |
| Campeche        | Champotón        | 0.62 | 0.51 | 0.72 | 0.62 | 0.19 | 1 | 3 d | LL | 4dLL |
| Campeche        | Hecelchakán      | 0.70 | 0.50 | 0.74 | 0.65 | 0.14 | 1 | 2 d | LL | 3dLL |
| Campeche        | Hopelchén        | 0.61 | 0.46 | 0.72 | 0.60 | 0.23 | 1 | 2 d | LL | 3dLL |
| Campeche        | Palizada         | 0.55 | 0.51 | 0.64 | 0.57 | 0.28 | 1 | 4 d | HL | 5dHL |
| Campeche        | Tenabo           | 0.70 | 0.51 | 0.74 | 0.65 | 0.14 | 1 | 2 d | LL | 3dLL |
| Campeche        | Escárcega        | 0.65 | 0.49 | 0.74 | 0.63 | 0.18 | 1 | 3 d | LL | 4dLL |
| Campeche        | Calakmul         | 0.40 | 0.44 | 0.54 | 0.46 | 0.45 | 2 | 2 b | LL | 4bLL |
| Campeche        | Candelaria       | 0.43 | 0.47 | 0.68 | 0.53 | 0.34 | 1 | 3 d | LL | 4dLL |
| Campeche        | Seybaplaya       | 0.63 | 0.52 | 0.72 | 0.62 | 0.18 | 1 | 3 d | LL | 4dLL |
| Coahuila        | Abasolo          | 0.51 | 0.49 | 0.42 | 0.47 | 0.43 | 2 | 3 d | LL | 5dLL |
| Coahuila        | Acuña            | 0.81 | 0.51 | 0.40 | 0.57 | 0.26 | 1 | 3 d | LL | 4dLL |
| Coahuila        | Allende          | 0.80 | 0.49 | 0.48 | 0.59 | 0.23 | 1 | 2 d | LL | 3dLL |
| Coahuila        | Arteaga          | 0.61 | 0.49 | 0.36 | 0.48 | 0.41 | 2 | 4 d | HL | 6dHL |
| Coahuila        | Candela          | 0.48 | 0.44 | 0.39 | 0.44 | 0.49 | 2 | 4 d | HL | 6dHL |
| Coahuila        | Castaños         | 0.79 | 0.49 | 0.38 | 0.55 | 0.30 | 1 | 5 d | HL | 6dHL |
| Coahuila        | Morelos          | 0.78 | 0.47 | 0.41 | 0.55 | 0.30 | 1 | 2 d | LL | 3dLL |
| Coahuila        | Múzquiz          | 0.79 | 0.47 | 0.42 | 0.56 | 0.28 | 1 | 3 d | LL | 4dLL |
| Coahuila        | Cuatro Ciénegas  | 0.74 | 0.44 | 0.37 | 0.52 | 0.36 | 2 | 4 d | HL | 6dHL |
| Coahuila        | Escobedo         | 0.51 | 0.39 | 0.41 | 0.44 | 0.49 | 2 | 2 b | LL | 4bLL |
|                 | Francisco I.     |      |      |      |      |      |   |     |    |      |
| Coahuila        | Madero           | 0.72 | 0.45 | 0.42 | 0.53 | 0.33 | 1 | 3 d | NS | 4dNS |
| Coahuila        | Nadadores        | 0.72 | 0.47 | 0.40 | 0.53 | 0.34 | 1 | 4 d | HL | 5dHL |
| Coahuila        | Frontera         | 0.83 | 0.51 | 0.41 | 0.59 | 0.24 | 1 | 5 d | HL | 6dHL |
| Coahuila        | General Cepeda   | 0.61 | 0.45 | 0.38 | 0.48 | 0.42 | 2 | 5 d | HL | 7dHL |
| Coahuila        | Guerrero         | 0.48 | 0.43 | 0.34 | 0.42 | 0.52 | 2 | 3 d | LL | 5dLL |
| Coahuila        | Sacramento       | 0.57 | 0.46 | 0.43 | 0.49 | 0.41 | 2 | 5 d | HL | 7dHL |
| Coahuila        | Saltillo         | 0.83 | 0.53 | 0.60 | 0.65 | 0.13 | 1 | 4 d | NS | 5dNS |
| Coahuila        | San Buenaventura | 0.82 | 0.51 | 0.42 | 0.58 | 0.25 | 1 | 4 d | HL | 5dHL |



|          |                     |      |      |      |      |      |   |     |    |      |
|----------|---------------------|------|------|------|------|------|---|-----|----|------|
| Coahuila | San Juan de Sabinas | 0.78 | 0.53 | 0.45 | 0.59 | 0.24 | 1 | 4 d | HL | 5dHL |
| Coahuila | San Pedro           | 0.69 | 0.43 | 0.40 | 0.51 | 0.38 | 2 | 4 d | HL | 6dHL |
| Coahuila | Hidalgo             | 0.50 | 0.43 | 0.42 | 0.45 | 0.47 | 2 | 3 d | LL | 5dLL |
| Coahuila | Jiménez             | 0.58 | 0.40 | 0.37 | 0.45 | 0.47 | 2 | 5 d | HL | 7dHL |
| Coahuila | Juárez              | 0.48 | 0.44 | 0.34 | 0.42 | 0.52 | 2 | 4 d | HL | 6dHL |
| Coahuila | Lamadrid            | 0.51 | 0.46 | 0.37 | 0.44 | 0.48 | 2 | 4 d | HL | 6dHL |
| Coahuila | Matamoros           | 0.69 | 0.46 | 0.45 | 0.53 | 0.33 | 1 | 4 d | HL | 5dHL |
| Coahuila | Monclova            | 0.88 | 0.53 | 0.41 | 0.61 | 0.21 | 1 | 5 d | HL | 6dHL |
| Coahuila | Nava                | 0.84 | 0.50 | 0.41 | 0.58 | 0.25 | 1 | 2 d | LL | 3dLL |
| Coahuila | Ocampo              | 0.61 | 0.44 | 0.33 | 0.46 | 0.45 | 2 | 3 d | LL | 5dLL |
| Coahuila | Parras              | 0.73 | 0.46 | 0.42 | 0.54 | 0.32 | 1 | 4 d | HL | 5dHL |
| Coahuila | Piedras Negras      | 0.81 | 0.51 | 0.41 | 0.58 | 0.26 | 1 | 3 d | LL | 4dLL |
| Coahuila | Progreso            | 0.47 | 0.44 | 0.37 | 0.43 | 0.50 | 2 | 3 d | LL | 5dLL |
| Coahuila | Ramos Arizpe        | 0.80 | 0.53 | 0.42 | 0.58 | 0.25 | 1 | 5 d | HL | 6dHL |
| Coahuila | Sabinas             | 0.79 | 0.52 | 0.40 | 0.57 | 0.27 | 1 | 5 d | HL | 6dHL |
| Coahuila | Sierra Mojada       | 0.67 | 0.50 | 0.33 | 0.50 | 0.39 | 2 | 4 d | HL | 6dHL |
| Coahuila | Torreón             | 0.92 | 0.49 | 0.42 | 0.61 | 0.20 | 1 | 4 d | NS | 5dNS |
| Coahuila | Viesca              | 0.58 | 0.39 | 0.36 | 0.44 | 0.48 | 2 | 4 d | HL | 6dHL |
| Coahuila | Villa Unión         | 0.71 | 0.44 | 0.43 | 0.52 | 0.35 | 1 | 3 d | LL | 4dLL |
| Coahuila | Zaragoza            | 0.72 | 0.47 | 0.39 | 0.53 | 0.34 | 1 | 3 d | LL | 4dLL |
| Colima   | Armería             | 0.69 | 0.33 | 0.58 | 0.53 | 0.34 | 1 | 3 d | LL | 4dLL |
| Colima   | Colima              | 0.85 | 0.39 | 0.49 | 0.58 | 0.26 | 1 | 3 d | LL | 4dLL |
| Colima   | Comala              | 0.75 | 0.32 | 0.45 | 0.51 | 0.38 | 2 | 5 d | HL | 7dHL |
| Colima   | Coquimatlán         | 0.67 | 0.34 | 0.51 | 0.51 | 0.37 | 2 | 3 d | LL | 5dLL |
| Colima   | Cuauhtémoc          | 0.82 | 0.36 | 0.45 | 0.54 | 0.31 | 1 | 5 d | HL | 6dHL |
| Colima   | Ixtlahuacán         | 0.61 | 0.29 | 0.47 | 0.46 | 0.45 | 2 | 3 d | LL | 5dLL |
| Colima   | Manzanillo          | 0.87 | 0.39 | 0.48 | 0.58 | 0.25 | 1 | 2 d | LL | 3dLL |
| Colima   | Minatitlán          | 0.69 | 0.32 | 0.43 | 0.48 | 0.41 | 2 | 3 d | NS | 5dNS |
| Colima   | Tecomán             | 0.78 | 0.33 | 0.63 | 0.58 | 0.25 | 1 | 4 d | HL | 5dHL |
| Colima   | Villa de Álvarez    | 0.86 | 0.41 | 0.48 | 0.58 | 0.25 | 1 | 4 d | HL | 5dHL |
| Chiapas  | Acacoyagua          | 0.49 | 0.16 | 0.82 | 0.49 | 0.40 | 2 | 4 d | NS | 6dNS |
| Chiapas  | Acala               | 0.49 | 0.18 | 0.89 | 0.52 | 0.35 | 2 | 5 d | HL | 7dHL |

|         |                           |      |      |      |      |      |   |     |    |      |
|---------|---------------------------|------|------|------|------|------|---|-----|----|------|
| Chiapas | Acapetahua                | 0.42 | 0.20 | 0.69 | 0.44 | 0.49 | 2 | 5 d | NS | 7dNS |
| Chiapas | Altamirano                | 0.36 | 0.15 | 0.78 | 0.43 | 0.51 | 2 | 4 d | NS | 6dNS |
| Chiapas | Amatán                    | 0.35 | 0.13 | 0.77 | 0.42 | 0.52 | 2 | 5 d | HL | 7dHL |
| Chiapas | Amatenango de la Frontera | 0.39 | 0.16 | 0.85 | 0.47 | 0.44 | 2 | 4 d | NS | 6dNS |
| Chiapas | Amatenango del Valle      | 0.36 | 0.12 | 0.78 | 0.42 | 0.52 | 2 | 3 d | NS | 5dNS |
| Chiapas | Ángel Albino Corzo        | 0.38 | 0.14 | 0.85 | 0.46 | 0.46 | 2 | 2 b | NS | 4bNS |
| Chiapas | Arriaga                   | 0.59 | 0.23 | 0.78 | 0.53 | 0.33 | 1 | 2 d | NS | 3dNS |
| Chiapas | Bejucal de Ocampo         | 0.35 | 0.13 | 0.68 | 0.39 | 0.57 | 3 | 4 d | NS | 7dNS |
| Chiapas | Pichucalco                | 0.50 | 0.24 | 0.80 | 0.51 | 0.37 | 2 | 3 d | NS | 5dNS |
| Chiapas | Pijijiapan                | 0.59 | 0.21 | 0.70 | 0.50 | 0.39 | 2 | 3 d | NS | 5dNS |
| Chiapas | Bella Vista               | 0.40 | 0.14 | 0.77 | 0.44 | 0.49 | 2 | 4 d | NS | 6dNS |
| Chiapas | Berriozábal               | 0.56 | 0.21 | 0.78 | 0.52 | 0.35 | 2 | 3 d | LL | 5dLL |
| Chiapas | Bochil                    | 0.43 | 0.17 | 0.85 | 0.48 | 0.42 | 2 | 3 d | NS | 5dNS |
| Chiapas | El Bosque                 | 0.33 | 0.12 | 0.84 | 0.43 | 0.51 | 2 | 3 d | NS | 5dNS |
| Chiapas | Cacahoatán                | 0.47 | 0.21 | 0.87 | 0.52 | 0.35 | 2 | 5 d | HL | 7dHL |
| Chiapas | Catazajá                  | 0.47 | 0.20 | 0.80 | 0.49 | 0.40 | 2 | 4 d | HL | 6dHL |
| Chiapas | Cintalapa                 | 0.55 | 0.20 | 0.83 | 0.53 | 0.34 | 1 | 2 d | NS | 3dNS |
| Chiapas | Coapilla                  | 0.41 | 0.14 | 0.89 | 0.48 | 0.42 | 2 | 3 d | LL | 5dLL |
| Chiapas | Comitán de Domínguez      | 0.65 | 0.23 | 0.83 | 0.57 | 0.27 | 1 | 5 d | NS | 6dNS |
| Chiapas | La Concordia              | 0.38 | 0.16 | 0.80 | 0.45 | 0.47 | 2 | 3 d | NS | 5dNS |
| Chiapas | Copainalá                 | 0.46 | 0.19 | 0.88 | 0.51 | 0.37 | 2 | 3 d | NS | 5dNS |
| Chiapas | Chalchihuitán             | 0.22 | 0.11 | 0.63 | 0.32 | 0.69 | 3 | 3 b | NS | 6bNS |
| Chiapas | Chamula                   | 0.22 | 0.12 | 0.73 | 0.35 | 0.63 | 3 | 3 b | NS | 6bNS |
| Chiapas | Chanal                    | 0.35 | 0.11 | 0.70 | 0.39 | 0.57 | 3 | 3 b | NS | 6bNS |
| Chiapas | Chapultenango             | 0.41 | 0.15 | 0.87 | 0.47 | 0.43 | 2 | 3 d | NS | 5dNS |
| Chiapas | Chenalhó                  | 0.33 | 0.11 | 0.75 | 0.40 | 0.56 | 3 | 3 b | NS | 6bNS |
| Chiapas | Chiapa de Corzo           | 0.56 | 0.24 | 0.84 | 0.55 | 0.31 | 1 | 4 d | NS | 5dNS |
| Chiapas | Chiapilla                 | 0.50 | 0.16 | 0.92 | 0.53 | 0.34 | 1 | 5 d | NS | 6dNS |
| Chiapas | Chicoasén                 | 0.52 | 0.18 | 0.88 | 0.53 | 0.34 | 1 | 3 d | NS | 4dNS |
| Chiapas | Chicomuselo               | 0.45 | 0.15 | 0.78 | 0.46 | 0.46 | 2 | 3 d | NS | 5dNS |

|         |                                   |      |      |      |      |      |   |     |    |      |
|---------|-----------------------------------|------|------|------|------|------|---|-----|----|------|
| Chiapas | Chilón                            | 0.33 | 0.12 | 0.81 | 0.42 | 0.52 | 2 | 3 d | NS | 5dNS |
| Chiapas | Escuintla                         | 0.48 | 0.18 | 0.85 | 0.50 | 0.38 | 2 | 5 d | NS | 7dNS |
| Chiapas | Francisco León<br>Frontera        | 0.27 | 0.13 | 0.85 | 0.42 | 0.52 | 2 | 2 b | NS | 4bNS |
| Chiapas | Comalapa                          | 0.50 | 0.20 | 0.85 | 0.51 | 0.36 | 2 | 5 d | NS | 7dNS |
| Chiapas | Frontera Hidalgo                  | 0.48 | 0.22 | 0.78 | 0.49 | 0.40 | 2 | 5 d | HL | 7dHL |
| Chiapas | La Grandeza                       | 0.35 | 0.14 | 0.75 | 0.41 | 0.53 | 2 | 4 d | NS | 6dNS |
| Chiapas | Huehuetán                         | 0.52 | 0.21 | 0.67 | 0.47 | 0.44 | 2 | 5 d | HL | 7dHL |
| Chiapas | Huixtán                           | 0.27 | 0.12 | 0.72 | 0.37 | 0.60 | 3 | 3 b | NS | 6bNS |
| Chiapas | Huitiupán                         | 0.33 | 0.13 | 0.79 | 0.42 | 0.53 | 2 | 4 d | NS | 6dNS |
| Chiapas | Huixtla                           | 0.51 | 0.23 | 0.78 | 0.51 | 0.38 | 2 | 5 d | NS | 7dNS |
| Chiapas | La Independencia                  | 0.51 | 0.13 | 0.83 | 0.49 | 0.40 | 2 | 4 d | NS | 6dNS |
| Chiapas | Ixhuatán                          | 0.39 | 0.15 | 0.90 | 0.48 | 0.42 | 2 | 3 d | NS | 5dNS |
| Chiapas | Ixtacomitán                       | 0.47 | 0.19 | 0.83 | 0.49 | 0.40 | 2 | 3 d | NS | 5dNS |
| Chiapas | Ixtapa                            | 0.46 | 0.15 | 0.88 | 0.50 | 0.39 | 2 | 3 d | NS | 5dNS |
| Chiapas | Ixtapangajoyá                     | 0.34 | 0.20 | 0.78 | 0.44 | 0.49 | 2 | 4 d | HL | 6dHL |
| Chiapas | Jiquipilas                        | 0.43 | 0.21 | 0.81 | 0.49 | 0.41 | 2 | 3 d | LL | 5dLL |
| Chiapas | Jitotol                           | 0.44 | 0.13 | 0.88 | 0.48 | 0.42 | 2 | 3 d | NS | 5dNS |
| Chiapas | Juárez                            | 0.48 | 0.24 | 0.74 | 0.48 | 0.41 | 2 | 3 d | LL | 5dLL |
| Chiapas | Larráinzar                        | 0.27 | 0.12 | 0.74 | 0.37 | 0.60 | 3 | 3 b | NS | 6bNS |
| Chiapas | La Libertad                       | 0.36 | 0.26 | 0.78 | 0.47 | 0.44 | 2 | 4 d | HL | 6dHL |
| Chiapas | Mapastepec                        | 0.47 | 0.21 | 0.78 | 0.49 | 0.41 | 2 | 2 b | NS | 4bNS |
| Chiapas | Las Margaritas                    | 0.40 | 0.13 | 0.80 | 0.44 | 0.48 | 2 | 4 d | NS | 6dNS |
| Chiapas | El Porvenir<br>Mazapa de          | 0.36 | 0.13 | 0.64 | 0.38 | 0.59 | 3 | 3 b | NS | 6bNS |
| Chiapas | Madero                            | 0.40 | 0.16 | 0.79 | 0.45 | 0.47 | 2 | 4 d | NS | 6dNS |
| Chiapas | Mazatán                           | 0.55 | 0.22 | 0.62 | 0.46 | 0.45 | 2 | 5 d | NS | 7dNS |
| Chiapas | Villa Comaltitlán<br>Pueblo Nuevo | 0.45 | 0.20 | 0.72 | 0.46 | 0.46 | 2 | 5 d | NS | 7dNS |
| Chiapas | Solistahuacán                     | 0.41 | 0.14 | 0.88 | 0.47 | 0.43 | 2 | 4 d | NS | 6dNS |
| Chiapas | Metapa                            | 0.49 | 0.22 | 0.78 | 0.50 | 0.39 | 2 | 5 d | HL | 7dHL |
| Chiapas | Mitontic                          | 0.16 | 0.12 | 0.70 | 0.33 | 0.68 | 3 | 3 b | NS | 6bNS |
| Chiapas | Motozintla                        | 0.48 | 0.18 | 0.78 | 0.48 | 0.42 | 2 | 5 d | NS | 7dNS |
| Chiapas | Nicolás Ruíz                      | 0.55 | 0.11 | 0.83 | 0.50 | 0.39 | 2 | 4 d | HL | 6dHL |

|         |                    |      |      |      |      |      |   |     |    |      |
|---------|--------------------|------|------|------|------|------|---|-----|----|------|
| Chiapas | Ocosingo           | 0.35 | 0.15 | 0.79 | 0.43 | 0.51 | 2 | 3 d | NS | 5dNS |
| Chiapas | Ocotepec           | 0.30 | 0.12 | 0.86 | 0.43 | 0.51 | 2 | 2 b | NS | 4bNS |
| Chiapas | Ocozocoautla de    |      |      |      |      |      |   |     |    |      |
| Chiapas | Espinosa           | 0.48 | 0.19 | 0.83 | 0.50 | 0.38 | 2 | 3 d | LL | 5dLL |
| Chiapas | Ostuacán           | 0.40 | 0.20 | 0.75 | 0.45 | 0.46 | 2 | 2 b | NS | 4bNS |
| Chiapas | Osumacinta         | 0.37 | 0.21 | 0.91 | 0.50 | 0.39 | 2 | 3 d | LL | 5dLL |
| Chiapas | Oxchuc             | 0.34 | 0.12 | 0.65 | 0.37 | 0.61 | 3 | 3 b | NS | 6bNS |
| Chiapas | Palenque           | 0.45 | 0.18 | 0.82 | 0.48 | 0.41 | 2 | 4 d | HL | 6dHL |
| Chiapas | Pantelhó           | 0.26 | 0.12 | 0.82 | 0.40 | 0.56 | 3 | 3 b | NS | 6bNS |
| Chiapas | Pantepec           | 0.28 | 0.14 | 0.86 | 0.42 | 0.51 | 2 | 2 b | NS | 4bNS |
| Chiapas | Rayón              | 0.47 | 0.14 | 0.84 | 0.48 | 0.42 | 2 | 3 d | NS | 5dNS |
| Chiapas | Reforma            | 0.66 | 0.26 | 0.85 | 0.59 | 0.24 | 1 | 2 d | LL | 3dLL |
| Chiapas | Las Rosas          | 0.50 | 0.15 | 0.86 | 0.50 | 0.38 | 2 | 4 d | NS | 6dNS |
| Chiapas | Sabanilla          | 0.35 | 0.12 | 0.80 | 0.42 | 0.51 | 2 | 5 d | NS | 7dNS |
| Chiapas | Salto de Agua      | 0.37 | 0.13 | 0.83 | 0.45 | 0.48 | 2 | 3 d | NS | 5dNS |
| Chiapas | San Cristóbal de   |      |      |      |      |      |   |     |    |      |
| Chiapas | las Casas          | 0.67 | 0.24 | 0.86 | 0.59 | 0.24 | 1 | 4 d | NS | 5dNS |
| Chiapas | San Fernando       | 0.49 | 0.20 | 0.83 | 0.51 | 0.38 | 2 | 3 d | LL | 5dLL |
| Chiapas | Siltepec           | 0.39 | 0.13 | 0.76 | 0.43 | 0.50 | 2 | 3 d | NS | 5dNS |
| Chiapas | Simojovel          | 0.35 | 0.13 | 0.81 | 0.43 | 0.51 | 2 | 4 d | NS | 6dNS |
| Chiapas | Sitalá             | 0.20 | 0.12 | 0.71 | 0.34 | 0.66 | 3 | 3 b | NS | 6bNS |
| Chiapas | Socoltenango       | 0.45 | 0.17 | 0.89 | 0.50 | 0.38 | 2 | 4 d | HL | 6dHL |
| Chiapas | Solosuchiapa       | 0.38 | 0.17 | 0.86 | 0.47 | 0.44 | 2 | 3 d | NS | 5dNS |
| Chiapas | Soyaló             | 0.57 | 0.14 | 0.89 | 0.53 | 0.33 | 1 | 3 d | NS | 4dNS |
| Chiapas | Suchiapa           | 0.61 | 0.20 | 0.87 | 0.56 | 0.29 | 1 | 3 d | LL | 4dLL |
| Chiapas | Suchiate           | 0.52 | 0.20 | 0.90 | 0.54 | 0.32 | 1 | 5 d | HL | 6dHL |
| Chiapas | Sunuapa            | 0.38 | 0.19 | 0.76 | 0.44 | 0.48 | 2 | 3 d | NS | 5dNS |
| Chiapas | Tapachula          | 0.67 | 0.25 | 0.81 | 0.58 | 0.26 | 1 | 5 d | NS | 6dNS |
| Chiapas | Tapalapa           | 0.31 | 0.16 | 0.88 | 0.45 | 0.47 | 2 | 2 b | NS | 4bNS |
| Chiapas | Capitán Luis Ángel |      |      |      |      |      |   |     |    |      |
| Chiapas | Vidal              | 0.38 | 0.13 | 0.76 | 0.43 | 0.51 | 2 | 2 b | NS | 4bNS |
| Chiapas | Tapilula           | 0.50 | 0.18 | 0.89 | 0.52 | 0.35 | 1 | 3 d | NS | 4dNS |
| Chiapas | Tecpatán           | 0.40 | 0.17 | 0.84 | 0.47 | 0.44 | 2 | 3 d | NS | 5dNS |
| Chiapas | Tenejapa           | 0.31 | 0.12 | 0.86 | 0.43 | 0.51 | 2 | 3 d | NS | 5dNS |

|         |                    |      |      |      |      |      |   |     |    |      |
|---------|--------------------|------|------|------|------|------|---|-----|----|------|
| Chiapas | Teopisca           | 0.47 | 0.15 | 0.86 | 0.49 | 0.40 | 2 | 4 d | HL | 6dHL |
| Chiapas | Tila               | 0.42 | 0.12 | 0.80 | 0.45 | 0.47 | 2 | 4 d | NS | 6dNS |
| Chiapas | Tonalá             | 0.57 | 0.21 | 0.74 | 0.51 | 0.38 | 2 | 2 b | NS | 4bNS |
| Chiapas | Totolapa           | 0.52 | 0.12 | 0.93 | 0.52 | 0.35 | 1 | 5 d | HL | 6dHL |
| Chiapas | La Trinitaria      | 0.51 | 0.15 | 0.77 | 0.48 | 0.43 | 2 | 5 d | HL | 7dHL |
| Chiapas | Tumbalá            | 0.30 | 0.12 | 0.78 | 0.40 | 0.55 | 3 | 3 b | NS | 6bNS |
| Chiapas | Tuxtla Gutiérrez   | 0.74 | 0.31 | 0.86 | 0.64 | 0.16 | 1 | 3 d | LL | 4dLL |
| Chiapas | Tuxtla Chico       | 0.48 | 0.24 | 0.72 | 0.48 | 0.42 | 2 | 5 d | HL | 7dHL |
| Chiapas | Tuzantán           | 0.47 | 0.18 | 0.84 | 0.50 | 0.39 | 2 | 5 d | HL | 7dHL |
| Chiapas | Tzimol             | 0.48 | 0.16 | 0.85 | 0.50 | 0.39 | 2 | 5 d | HL | 7dHL |
| Chiapas | Unión Juárez       | 0.51 | 0.19 | 0.92 | 0.54 | 0.32 | 1 | 5 d | HL | 6dHL |
|         | Venustiano         |      |      |      |      |      |   |     |    |      |
| Chiapas | Carranza           | 0.49 | 0.16 | 0.88 | 0.51 | 0.37 | 2 | 3 d | LL | 5dLL |
| Chiapas | Villa Corzo        | 0.57 | 0.16 | 0.81 | 0.52 | 0.36 | 2 | 3 d | LL | 5dLL |
| Chiapas | Villaflores        | 0.60 | 0.19 | 0.83 | 0.54 | 0.32 | 1 | 2 d | LL | 3dLL |
| Chiapas | Yajalón            | 0.50 | 0.16 | 0.84 | 0.50 | 0.39 | 2 | 3 d | NS | 5dNS |
| Chiapas | San Lucas          | 0.46 | 0.13 | 0.90 | 0.50 | 0.39 | 2 | 5 d | NS | 7dNS |
| Chiapas | Zinacantán         | 0.35 | 0.12 | 0.76 | 0.41 | 0.54 | 3 | 4 d | NS | 7dNS |
| Chiapas | San Juan Cancuc    | 0.31 | 0.11 | 0.75 | 0.39 | 0.57 | 3 | 3 b | NS | 6bNS |
| Chiapas | Aldama             | 0.16 | 0.11 | 0.71 | 0.33 | 0.68 | 3 | 3 b | NS | 6bNS |
|         | Benemérito de las  |      |      |      |      |      |   |     |    |      |
| Chiapas | Américas           | 0.36 | 0.17 | 0.67 | 0.40 | 0.55 | 3 | 3 b | NS | 6bNS |
| Chiapas | Maravilla Tenejapa | 0.23 | 0.12 | 0.77 | 0.37 | 0.60 | 3 | 4 d | NS | 7dNS |
|         | Marqués de         |      |      |      |      |      |   |     |    |      |
| Chiapas | Comillas           | 0.35 | 0.16 | 0.66 | 0.39 | 0.57 | 3 | 3 b | NS | 6bNS |
|         | Montecristo de     |      |      |      |      |      |   |     |    |      |
| Chiapas | Guerrero           | 0.37 | 0.12 | 0.83 | 0.44 | 0.48 | 2 | 2 b | NS | 4bNS |
|         | San Andrés         |      |      |      |      |      |   |     |    |      |
| Chiapas | Duraznal           | 0.29 | 0.12 | 0.87 | 0.42 | 0.51 | 2 | 3 d | NS | 5dNS |
| Chiapas | Santiago el Pinar  | 0.12 | 0.11 | 0.77 | 0.33 | 0.66 | 3 | 3 b | NS | 6bNS |
|         | Rincón Chamula     |      |      |      |      |      |   |     |    |      |
| Chiapas | San Pedro          | 0.41 | 0.14 | 0.89 | 0.48 | 0.42 | 2 | 3 d | NS | 5dNS |
| Chiapas | El Parral          | 0.56 | 0.17 | 0.82 | 0.52 | 0.36 | 2 | 3 d | LL | 5dLL |
| Chiapas | Emiliano Zapata    | 0.50 | 0.18 | 0.88 | 0.52 | 0.36 | 2 | 5 d | HL | 7dHL |
| Chiapas | Mezcalapa          | 0.40 | 0.17 | 0.83 | 0.47 | 0.44 | 2 | 2 b | NS | 4bNS |

|           |                                 |      |      |      |      |      |   |     |    |      |
|-----------|---------------------------------|------|------|------|------|------|---|-----|----|------|
| Chiapas   | Honduras de la Sierra           | 0.38 | 0.13 | 0.78 | 0.43 | 0.50 | 2 | 2 b | NS | 4bNS |
| Chihuahua | Ahumada                         | 0.68 | 0.38 | 0.39 | 0.49 | 0.41 | 2 | 3 d | LL | 5dLL |
| Chihuahua | Aldama                          | 0.80 | 0.41 | 0.40 | 0.54 | 0.32 | 1 | 5 d | HL | 6dHL |
| Chihuahua | Allende                         | 0.65 | 0.41 | 0.42 | 0.49 | 0.40 | 2 | 4 d | HL | 6dHL |
| Chihuahua | Aquiles Serdán                  | 0.53 | 0.45 | 0.33 | 0.44 | 0.49 | 2 | 4 d | HL | 6dHL |
| Chihuahua | Ascensión                       | 0.75 | 0.34 | 0.39 | 0.49 | 0.40 | 2 | 4 d | HL | 6dHL |
| Chihuahua | Bachíniva                       | 0.54 | 0.45 | 0.37 | 0.45 | 0.46 | 2 | 2 b | NS | 4bNS |
| Chihuahua | Balleza                         | 0.36 | 0.28 | 0.18 | 0.27 | 0.76 | 4 | 5 d | NS | 9dNS |
| Chihuahua | Batopilas de Manuel Gómez Morín | 0.34 | 0.20 | 0.16 | 0.24 | 0.83 | 4 | 4 b | HH | 8bHH |
| Chihuahua | Bocoyna                         | 0.61 | 0.31 | 0.29 | 0.40 | 0.55 | 3 | 5 d | NS | 8dNS |
| Chihuahua | Buenaventura                    | 0.68 | 0.34 | 0.42 | 0.48 | 0.42 | 2 | 4 d | HL | 6dHL |
| Chihuahua | Camargo                         | 0.77 | 0.40 | 0.41 | 0.53 | 0.34 | 1 | 4 d | HL | 5dHL |
| Chihuahua | Carichí                         | 0.43 | 0.32 | 0.24 | 0.33 | 0.68 | 3 | 3 b | NS | 6bNS |
| Chihuahua | Casas Grandes                   | 0.67 | 0.40 | 0.38 | 0.48 | 0.41 | 2 | 5 d | NS | 7dNS |
| Chihuahua | Coronado                        | 0.51 | 0.41 | 0.38 | 0.43 | 0.50 | 2 | 5 d | NS | 7dNS |
| Chihuahua | Coyame del Sotol                | 0.45 | 0.44 | 0.34 | 0.41 | 0.53 | 2 | 5 d | HL | 7dHL |
| Chihuahua | La Cruz                         | 0.63 | 0.42 | 0.40 | 0.48 | 0.41 | 2 | 4 d | HL | 6dHL |
| Chihuahua | Cuauhtémoc                      | 0.76 | 0.42 | 0.49 | 0.56 | 0.29 | 1 | 3 d | NS | 4dNS |
| Chihuahua | Cusihuiachi                     | 0.51 | 0.43 | 0.39 | 0.44 | 0.48 | 2 | 3 d | NS | 5dNS |
| Chihuahua | Chihuahua                       | 0.85 | 0.46 | 0.42 | 0.58 | 0.26 | 1 | 4 d | HL | 5dHL |
| Chihuahua | Chínipas                        | 0.42 | 0.26 | 0.29 | 0.33 | 0.68 | 3 | 5 d | HH | 8dHH |
| Chihuahua | Delicias                        | 0.81 | 0.45 | 0.62 | 0.63 | 0.17 | 1 | 5 d | HL | 6dHL |
| Chihuahua | Dr. Belisario Domínguez         | 0.48 | 0.40 | 0.36 | 0.41 | 0.53 | 2 | 4 d | NS | 6dNS |
| Chihuahua | Galeana                         | 0.57 | 0.41 | 0.42 | 0.47 | 0.44 | 2 | 5 d | HL | 7dHL |
| Chihuahua | Santa Isabel                    | 0.56 | 0.39 | 0.40 | 0.45 | 0.47 | 2 | 4 d | NS | 6dNS |
| Chihuahua | Gómez Farías                    | 0.67 | 0.40 | 0.40 | 0.49 | 0.40 | 2 | 5 d | NS | 7dNS |
| Chihuahua | Gran Morelos                    | 0.50 | 0.41 | 0.37 | 0.43 | 0.51 | 2 | 3 d | NS | 5dNS |
| Chihuahua | Guachochi                       | 0.50 | 0.28 | 0.22 | 0.33 | 0.66 | 3 | 4 d | HH | 7dHH |
| Chihuahua | Guadalupe                       | 0.61 | 0.40 | 0.39 | 0.46 | 0.45 | 2 | 3 d | LL | 5dLL |
| Chihuahua | Guadalupe y Calvo               | 0.44 | 0.23 | 0.20 | 0.29 | 0.74 | 4 | 4 b | HH | 8bHH |

|           |                    |      |      |      |      |      |   |     |    |      |
|-----------|--------------------|------|------|------|------|------|---|-----|----|------|
| Chihuahua | Guazapares         | 0.38 | 0.28 | 0.28 | 0.31 | 0.70 | 3 | 4 d | HH | 7dHH |
| Chihuahua | Guerrero           | 0.65 | 0.37 | 0.37 | 0.46 | 0.45 | 2 | 4 d | NS | 6dNS |
| Chihuahua | Hidalgo del Parral | 0.85 | 0.41 | 0.41 | 0.56 | 0.29 | 1 | 4 d | HL | 5dHL |
| Chihuahua | Huejotitán         | 0.50 | 0.33 | 0.29 | 0.37 | 0.60 | 3 | 4 d | NS | 7dNS |
| Chihuahua | Ignacio Zaragoza   | 0.71 | 0.39 | 0.39 | 0.49 | 0.40 | 2 | 5 d | NS | 7dNS |
| Chihuahua | Janos              | 0.54 | 0.37 | 0.37 | 0.43 | 0.51 | 2 | 4 d | HL | 6dHL |
| Chihuahua | Jiménez            | 0.76 | 0.38 | 0.41 | 0.52 | 0.36 | 2 | 4 d | NS | 6dNS |
| Chihuahua | Juárez             | 0.88 | 0.43 | 0.40 | 0.57 | 0.27 | 1 | 3 d | LL | 4dLL |
| Chihuahua | Julimes            | 0.59 | 0.44 | 0.41 | 0.48 | 0.42 | 2 | 4 d | HL | 6dHL |
| Chihuahua | López              | 0.51 | 0.44 | 0.42 | 0.46 | 0.45 | 2 | 5 d | HL | 7dHL |
| Chihuahua | Madera             | 0.75 | 0.34 | 0.37 | 0.49 | 0.41 | 2 | 5 d | NS | 7dNS |
| Chihuahua | Maguarichi         | 0.42 | 0.29 | 0.31 | 0.34 | 0.65 | 3 | 5 d | NS | 8dNS |
| Chihuahua | Manuel Benavides   | 0.45 | 0.44 | 0.25 | 0.38 | 0.59 | 3 | 5 d | HL | 8dHL |
| Chihuahua | Matachí            | 0.61 | 0.40 | 0.39 | 0.47 | 0.44 | 2 | 3 d | NS | 5dNS |
| Chihuahua | Matamoros          | 0.60 | 0.40 | 0.39 | 0.46 | 0.45 | 2 | 5 d | HL | 7dHL |
| Chihuahua | Meoqui             | 0.74 | 0.42 | 0.72 | 0.63 | 0.18 | 1 | 5 d | HL | 6dHL |
| Chihuahua | Morelos            | 0.38 | 0.24 | 0.21 | 0.28 | 0.76 | 4 | 4 b | HH | 8bHH |
| Chihuahua | Moris              | 0.46 | 0.28 | 0.33 | 0.35 | 0.63 | 3 | 3 b | NS | 6bNS |
| Chihuahua | Namiquipa          | 0.63 | 0.42 | 0.40 | 0.48 | 0.42 | 2 | 4 d | HL | 6dHL |
| Chihuahua | Nonoava            | 0.49 | 0.33 | 0.35 | 0.39 | 0.57 | 3 | 3 b | NS | 6bNS |
| Chihuahua | Nuevo Casas        |      |      |      |      |      |   |     |    |      |
| Chihuahua | Grandes            | 0.77 | 0.41 | 0.44 | 0.54 | 0.32 | 1 | 5 d | NS | 6dNS |
| Chihuahua | Ocampo             | 0.48 | 0.37 | 0.28 | 0.38 | 0.60 | 3 | 3 b | NS | 6bNS |
| Chihuahua | Ojinaga            | 0.78 | 0.36 | 0.41 | 0.52 | 0.36 | 2 | 5 d | HL | 7dHL |
| Chihuahua | Praxedis G.        |      |      |      |      |      |   |     |    |      |
| Chihuahua | Guerrero           | 0.65 | 0.43 | 0.51 | 0.53 | 0.34 | 1 | 3 d | NS | 4dNS |
| Chihuahua | Riva Palacio       | 0.52 | 0.43 | 0.33 | 0.43 | 0.51 | 2 | 3 d | NS | 5dNS |
| Chihuahua | Rosales            | 0.66 | 0.42 | 0.44 | 0.51 | 0.37 | 2 | 4 d | HL | 6dHL |
| Chihuahua | Rosario            | 0.48 | 0.35 | 0.33 | 0.39 | 0.58 | 3 | 3 b | NS | 6bNS |
| Chihuahua | San Francisco de   |      |      |      |      |      |   |     |    |      |
| Chihuahua | Borja              | 0.56 | 0.41 | 0.38 | 0.45 | 0.47 | 2 | 3 d | NS | 5dNS |
| Chihuahua | San Francisco de   |      |      |      |      |      |   |     |    |      |
| Chihuahua | Conchos            | 0.55 | 0.46 | 0.40 | 0.47 | 0.44 | 2 | 3 d | LL | 5dLL |



|           |                           |      |      |      |      |      |   |     |    |      |
|-----------|---------------------------|------|------|------|------|------|---|-----|----|------|
| Chihuahua | San Francisco del Oro     | 0.80 | 0.42 | 0.39 | 0.53 | 0.33 | 1 | 4 d | NS | 5dNS |
| Chihuahua | Santa Bárbara             | 0.85 | 0.44 | 0.38 | 0.56 | 0.29 | 1 | 5 d | NS | 6dNS |
| Chihuahua | Satevó                    | 0.55 | 0.37 | 0.35 | 0.42 | 0.52 | 2 | 3 d | NS | 5dNS |
| Chihuahua | Saucillo                  | 0.77 | 0.44 | 0.43 | 0.54 | 0.31 | 1 | 4 d | HL | 5dHL |
| Chihuahua | Temósachic                | 0.53 | 0.37 | 0.33 | 0.41 | 0.53 | 2 | 2 b | NS | 4bNS |
| Chihuahua | El Tule                   | 0.48 | 0.35 | 0.37 | 0.40 | 0.55 | 3 | 3 b | NS | 6bNS |
| Chihuahua | Urique                    | 0.35 | 0.29 | 0.26 | 0.30 | 0.72 | 4 | 4 b | NS | 8bNS |
| Chihuahua | Uruachi                   | 0.39 | 0.23 | 0.21 | 0.28 | 0.76 | 4 | 4 b | NS | 8bNS |
| Chihuahua | Valle de Zaragoza         | 0.58 | 0.38 | 0.35 | 0.44 | 0.49 | 2 | 3 d | NS | 5dNS |
| CDMX      | Azcapotzalco              | 0.91 | 0.84 | 0.35 | 0.70 | 0.06 | 1 | 5 d | HL | 6dHL |
| CDMX      | Coyoacán                  | 0.96 | 0.84 | 0.35 | 0.71 | 0.03 | 1 | 5 d | HL | 6dHL |
| CDMX      | Cuajimalpa de Morelos     | 0.93 | 0.79 | 0.34 | 0.69 | 0.07 | 1 | 5 d | HL | 6dHL |
| CDMX      | Gustavo A. Madero         | 0.98 | 0.80 | 0.35 | 0.71 | 0.04 | 1 | 5 d | HL | 6dHL |
| CDMX      | Iztacalco                 | 0.95 | 0.82 | 0.35 | 0.71 | 0.04 | 1 | 5 d | HL | 6dHL |
| CDMX      | Iztapalapa                | 0.90 | 0.77 | 0.35 | 0.67 | 0.10 | 1 | 5 d | HL | 6dHL |
| CDMX      | La Magdalena Contreras    | 0.95 | 0.79 | 0.34 | 0.69 | 0.07 | 1 | 5 d | HL | 6dHL |
| CDMX      | Milpa Alta                | 0.87 | 0.72 | 0.31 | 0.63 | 0.17 | 1 | 3 d | LL | 4dLL |
| CDMX      | Álvaro Obregón            | 0.95 | 0.80 | 0.35 | 0.70 | 0.05 | 1 | 5 d | HL | 6dHL |
| CDMX      | Tláhuac                   | 0.88 | 0.76 | 0.43 | 0.69 | 0.07 | 1 | 5 d | HL | 6dHL |
| CDMX      | Tlalpan                   | 0.93 | 0.79 | 0.30 | 0.67 | 0.10 | 1 | 5 d | HL | 6dHL |
| CDMX      | Xochimilco                | 0.96 | 0.76 | 0.36 | 0.69 | 0.06 | 1 | 5 d | HL | 6dHL |
| CDMX      | Benito Juárez             | 0.91 | 0.89 | 0.34 | 0.72 | 0.03 | 1 | 5 d | HL | 6dHL |
| CDMX      | Cuauhtémoc                | 0.94 | 0.84 | 0.34 | 0.71 | 0.04 | 1 | 5 d | HL | 6dHL |
| CDMX      | Miguel Hidalgo Venustiano | 0.87 | 0.87 | 0.34 | 0.69 | 0.06 | 1 | 5 d | HL | 6dHL |
| CDMX      | Carranza                  | 0.88 | 0.81 | 0.35 | 0.68 | 0.08 | 1 | 5 d | HL | 6dHL |
| Durango   | Canatlán                  | 0.59 | 0.21 | 0.42 | 0.41 | 0.54 | 3 | 5 d | NS | 8dNS |
| Durango   | Canelas                   | 0.38 | 0.12 | 0.27 | 0.26 | 0.79 | 4 | 3 v | LH | 7vLH |
| Durango   | Coneto de Comonfort       | 0.44 | 0.13 | 0.31 | 0.29 | 0.73 | 4 | 4 b | NS | 8bNS |
| Durango   | Cuencamé                  | 0.65 | 0.22 | 0.34 | 0.40 | 0.55 | 3 | 4 d | NS | 7dNS |

|         |                    |      |      |      |      |      |   |     |    |      |
|---------|--------------------|------|------|------|------|------|---|-----|----|------|
| Durango | Durango            | 0.84 | 0.27 | 0.45 | 0.52 | 0.35 | 2 | 5 d | NS | 7dNS |
|         | General Simón      |      |      |      |      |      |   |     |    |      |
| Durango | Bolívar            | 0.55 | 0.21 | 0.34 | 0.36 | 0.62 | 3 | 4 d | NS | 7dNS |
| Durango | Gómez Palacio      | 0.78 | 0.27 | 0.63 | 0.56 | 0.29 | 1 | 4 d | HL | 5dHL |
| Durango | Guadalupe Victoria | 0.67 | 0.21 | 0.43 | 0.44 | 0.49 | 2 | 4 d | NS | 6dNS |
| Durango | Guanaceví          | 0.46 | 0.17 | 0.22 | 0.28 | 0.75 | 4 | 4 b | NS | 8bNS |
| Durango | Hidalgo            | 0.48 | 0.19 | 0.27 | 0.31 | 0.70 | 3 | 4 d | NS | 7dNS |
| Durango | Indé               | 0.48 | 0.17 | 0.31 | 0.32 | 0.69 | 3 | 4 d | HH | 7dHH |
| Durango | Lerdo              | 0.72 | 0.26 | 0.41 | 0.46 | 0.45 | 2 | 5 d | NS | 7dNS |
| Durango | Mapimí             | 0.63 | 0.21 | 0.37 | 0.41 | 0.54 | 3 | 4 d | NS | 7dNS |
| Durango | Mezquital          | 0.36 | 0.07 | 0.17 | 0.20 | 0.88 | 4 | 3 v | NS | 7vNS |
| Durango | Nazas              | 0.53 | 0.19 | 0.37 | 0.37 | 0.61 | 3 | 5 d | NS | 8dNS |
| Durango | Nombre de Dios     | 0.58 | 0.19 | 0.45 | 0.41 | 0.54 | 3 | 5 d | NS | 8dNS |
| Durango | Ocampo             | 0.54 | 0.20 | 0.33 | 0.36 | 0.63 | 3 | 4 d | NS | 7dNS |
| Durango | El Oro             | 0.67 | 0.22 | 0.33 | 0.40 | 0.55 | 3 | 5 d | NS | 8dNS |
| Durango | Otáez              | 0.39 | 0.09 | 0.30 | 0.26 | 0.79 | 4 | 3 v | LH | 7vLH |
|         | Pánuco de          |      |      |      |      |      |   |     |    |      |
| Durango | Coronado           | 0.63 | 0.20 | 0.42 | 0.42 | 0.53 | 2 | 5 d | NS | 7dNS |
| Durango | Peñón Blanco       | 0.64 | 0.17 | 0.26 | 0.36 | 0.62 | 3 | 4 d | NS | 7dNS |
| Durango | Poanas             | 0.62 | 0.18 | 0.45 | 0.42 | 0.52 | 2 | 5 d | NS | 7dNS |
| Durango | Pueblo Nuevo       | 0.56 | 0.18 | 0.34 | 0.36 | 0.62 | 3 | 3 b | NS | 6bNS |
| Durango | Rodeo              | 0.56 | 0.22 | 0.35 | 0.38 | 0.59 | 3 | 5 d | NS | 8dNS |
| Durango | San Bernardo       | 0.46 | 0.19 | 0.25 | 0.30 | 0.72 | 4 | 4 b | NS | 8bNS |
| Durango | San Dimas          | 0.52 | 0.16 | 0.31 | 0.33 | 0.67 | 3 | 3 b | NS | 6bNS |
|         | San Juan de        |      |      |      |      |      |   |     |    |      |
| Durango | Guadalupe          | 0.41 | 0.15 | 0.23 | 0.26 | 0.79 | 4 | 4 b | NS | 8bNS |
| Durango | San Juan del Río   | 0.51 | 0.19 | 0.33 | 0.34 | 0.65 | 3 | 5 d | NS | 8dNS |
| Durango | Súchil             | 0.58 | 0.15 | 0.38 | 0.37 | 0.60 | 3 | 4 d | NS | 7dNS |
| Durango | Tamazula           | 0.40 | 0.11 | 0.16 | 0.23 | 0.84 | 4 | 3 v | LH | 7vLH |
| Durango | Tepehuanes         | 0.54 | 0.16 | 0.27 | 0.32 | 0.68 | 3 | 3 b | LH | 6bLH |
|         | San Luis del       |      |      |      |      |      |   |     |    |      |
| Durango | Cordero            | 0.44 | 0.18 | 0.34 | 0.32 | 0.68 | 3 | 5 d | NS | 8dNS |
|         | San Pedro del      |      |      |      |      |      |   |     |    |      |
| Durango | Gallo              | 0.48 | 0.19 | 0.35 | 0.34 | 0.66 | 3 | 5 d | NS | 8dNS |

|            |                    |      |      |      |      |      |   |     |    |      |
|------------|--------------------|------|------|------|------|------|---|-----|----|------|
| Durango    | Santa Clara        | 0.61 | 0.13 | 0.37 | 0.37 | 0.61 | 3 | 4 d | NS | 7dNS |
|            | Santiago           |      |      |      |      |      |   |     |    |      |
| Durango    | Papasquiario       | 0.64 | 0.20 | 0.31 | 0.38 | 0.58 | 3 | 2 v | LH | 5vLH |
| Durango    | Tlahualilo         | 0.65 | 0.24 | 0.40 | 0.43 | 0.51 | 2 | 4 d | NS | 6dNS |
| Durango    | Topia              | 0.47 | 0.12 | 0.29 | 0.29 | 0.73 | 4 | 3 v | LH | 7vLH |
| Durango    | Vicente Guerrero   | 0.78 | 0.21 | 0.47 | 0.49 | 0.41 | 2 | 4 d | NS | 6dNS |
| Durango    | Nuevo Ideal        | 0.60 | 0.20 | 0.41 | 0.40 | 0.55 | 3 | 4 d | NS | 7dNS |
| Guanajuato | Abasolo            | 0.56 | 0.38 | 0.62 | 0.52 | 0.35 | 1 | 3 d | LL | 4dLL |
| Guanajuato | Acámbaro           | 0.68 | 0.40 | 0.53 | 0.54 | 0.33 | 1 | 4 d | NS | 5dNS |
|            | San Miguel de      |      |      |      |      |      |   |     |    |      |
| Guanajuato | Allende            | 0.70 | 0.41 | 0.43 | 0.51 | 0.37 | 2 | 3 d | LL | 5dLL |
| Guanajuato | Apaseo el Alto     | 0.64 | 0.40 | 0.52 | 0.52 | 0.35 | 2 | 4 d | HL | 6dHL |
| Guanajuato | Apaseo el Grande   | 0.66 | 0.43 | 0.56 | 0.55 | 0.30 | 1 | 3 d | LL | 4dLL |
| Guanajuato | Atarjea            | 0.42 | 0.32 | 0.22 | 0.32 | 0.69 | 3 | 3 b | NS | 6bNS |
| Guanajuato | Celaya             | 0.83 | 0.47 | 0.65 | 0.65 | 0.13 | 1 | 4 d | HL | 5dHL |
| Guanajuato | Manuel Doblado     | 0.62 | 0.39 | 0.49 | 0.50 | 0.38 | 2 | 5 d | HL | 7dHL |
| Guanajuato | Comonfort          | 0.59 | 0.38 | 0.42 | 0.47 | 0.44 | 2 | 4 d | HL | 6dHL |
| Guanajuato | Coroneo            | 0.61 | 0.38 | 0.42 | 0.47 | 0.44 | 2 | 4 d | NS | 6dNS |
| Guanajuato | Cortazar           | 0.77 | 0.43 | 0.64 | 0.62 | 0.19 | 1 | 3 d | LL | 4dLL |
| Guanajuato | Cuerámaro          | 0.66 | 0.37 | 0.57 | 0.53 | 0.33 | 1 | 5 d | HL | 6dHL |
| Guanajuato | Doctor Mora        | 0.51 | 0.39 | 0.49 | 0.47 | 0.44 | 2 | 3 d | NS | 5dNS |
|            | Dolores Hidalgo    |      |      |      |      |      |   |     |    |      |
|            | Cuna de la         |      |      |      |      |      |   |     |    |      |
|            | Independencia      |      |      |      |      |      |   |     |    |      |
| Guanajuato | Nacional           | 0.57 | 0.39 | 0.45 | 0.47 | 0.44 | 2 | 4 d | NS | 6dNS |
| Guanajuato | Guanajuato         | 0.73 | 0.48 | 0.41 | 0.54 | 0.32 | 1 | 4 d | HL | 5dHL |
| Guanajuato | Huanímaro          | 0.60 | 0.38 | 0.60 | 0.53 | 0.34 | 1 | 3 d | LL | 4dLL |
| Guanajuato | Irapuato           | 0.78 | 0.46 | 0.61 | 0.62 | 0.19 | 1 | 3 d | LL | 4dLL |
| Guanajuato | Jaral del Progreso | 0.67 | 0.40 | 0.70 | 0.59 | 0.24 | 1 | 4 d | HL | 5dHL |
| Guanajuato | Jerécuaro          | 0.56 | 0.34 | 0.37 | 0.42 | 0.51 | 2 | 4 d | NS | 6dNS |
| Guanajuato | León               | 0.91 | 0.47 | 0.50 | 0.63 | 0.18 | 1 | 5 d | HL | 6dHL |
| Guanajuato | Moroleón           | 0.78 | 0.42 | 0.45 | 0.55 | 0.30 | 1 | 5 d | NS | 6dNS |
| Guanajuato | Ocampo             | 0.53 | 0.38 | 0.39 | 0.43 | 0.50 | 2 | 3 d | NS | 5dNS |
| Guanajuato | Pénjamo            | 0.60 | 0.38 | 0.52 | 0.50 | 0.39 | 2 | 4 d | NS | 6dNS |

|            |                                  |      |      |      |      |      |   |     |    |      |
|------------|----------------------------------|------|------|------|------|------|---|-----|----|------|
| Guanajuato | Pueblo Nuevo Purísima del Rincón | 0.53 | 0.41 | 0.69 | 0.54 | 0.31 | 1 | 4 d | HL | 5dHL |
| Guanajuato | Romita                           | 0.73 | 0.44 | 0.59 | 0.59 | 0.24 | 1 | 5 d | HL | 6dHL |
| Guanajuato | Salamanca                        | 0.65 | 0.40 | 0.56 | 0.54 | 0.32 | 1 | 4 d | HL | 5dHL |
| Guanajuato | Salvatierra                      | 0.75 | 0.45 | 0.62 | 0.61 | 0.21 | 1 | 3 d | LL | 4dLL |
| Guanajuato | San Diego de la Unión            | 0.68 | 0.38 | 0.58 | 0.55 | 0.31 | 1 | 5 d | HL | 6dHL |
| Guanajuato | San Felipe                       | 0.52 | 0.36 | 0.41 | 0.43 | 0.50 | 2 | 3 d | NS | 5dNS |
| Guanajuato | San Francisco del Rincón         | 0.53 | 0.37 | 0.37 | 0.43 | 0.51 | 2 | 4 d | NS | 6dNS |
| Guanajuato | San José Iturbide                | 0.73 | 0.45 | 0.56 | 0.58 | 0.26 | 1 | 5 d | HL | 6dHL |
| Guanajuato | San Luis de la Paz               | 0.63 | 0.47 | 0.48 | 0.53 | 0.34 | 1 | 3 d | NS | 4dNS |
| Guanajuato | Santa Catarina                   | 0.62 | 0.40 | 0.43 | 0.49 | 0.41 | 2 | 3 d | NS | 5dNS |
| Guanajuato | Santa Cruz de Juventino Rosas    | 0.41 | 0.36 | 0.37 | 0.38 | 0.58 | 3 | 3 b | NS | 6bNS |
| Guanajuato | Santiago Maravatío               | 0.66 | 0.36 | 0.52 | 0.51 | 0.36 | 2 | 3 d | LL | 5dLL |
| Guanajuato | Silao de la Victoria             | 0.57 | 0.36 | 0.58 | 0.50 | 0.38 | 2 | 4 d | HL | 6dHL |
| Guanajuato | Tarandacuao                      | 0.71 | 0.42 | 0.53 | 0.55 | 0.30 | 1 | 3 d | LL | 4dLL |
| Guanajuato | Tarimoro                         | 0.61 | 0.40 | 0.52 | 0.51 | 0.37 | 2 | 4 d | NS | 6dNS |
| Guanajuato | Tierra Blanca                    | 0.55 | 0.39 | 0.52 | 0.49 | 0.41 | 2 | 3 d | LL | 5dLL |
| Guanajuato | Uriangato                        | 0.43 | 0.35 | 0.35 | 0.38 | 0.59 | 3 | 3 b | NS | 6bNS |
| Guanajuato | Valle de Santiago                | 0.72 | 0.39 | 0.48 | 0.53 | 0.34 | 1 | 5 d | NS | 6dNS |
| Guanajuato | Victoria                         | 0.63 | 0.40 | 0.56 | 0.53 | 0.34 | 1 | 3 d | LL | 4dLL |
| Guanajuato | Villagrán                        | 0.45 | 0.36 | 0.32 | 0.38 | 0.59 | 3 | 3 b | NS | 6bNS |
| Guanajuato | Xichú                            | 0.65 | 0.44 | 0.74 | 0.61 | 0.20 | 1 | 4 d | HL | 5dHL |
| Guanajuato | Yuriria                          | 0.41 | 0.33 | 0.29 | 0.34 | 0.65 | 3 | 3 b | NS | 6bNS |
| Guanajuato | Acapulco de Juárez               | 0.57 | 0.39 | 0.50 | 0.48 | 0.41 | 2 | 5 d | HL | 7dHL |
| Guerrero   | Ahuacuotzingo                    | 0.63 | 0.33 | 0.36 | 0.44 | 0.49 | 2 | 2 b | LH | 4bLH |
| Guerrero   | Ajuchitlán del Progreso          | 0.18 | 0.18 | 0.26 | 0.21 | 0.87 | 4 | 3 v | LH | 7vLH |
| Guerrero   | Alcozauca de Guerrero            | 0.31 | 0.23 | 0.14 | 0.22 | 0.85 | 4 | 2 v | LH | 6vLH |
| Guerrero   |                                  | 0.08 | 0.17 | 0.26 | 0.17 | 0.94 | 4 | 2 v | LH | 6vLH |

|          |                                         |      |      |      |      |      |   |     |    |      |
|----------|-----------------------------------------|------|------|------|------|------|---|-----|----|------|
| Guerrero | Alpoyeca                                | 0.38 | 0.23 | 0.40 | 0.34 | 0.66 | 3 | 3 b | LH | 6bLH |
| Guerrero | Apaxtla                                 | 0.36 | 0.25 | 0.29 | 0.30 | 0.72 | 4 | 2 v | LH | 6vLH |
| Guerrero | Arcelia                                 | 0.44 | 0.28 | 0.26 | 0.33 | 0.68 | 3 | 2 v | LH | 5vLH |
| Guerrero | Atenango del Río<br>Atlamajalcingo del  | 0.31 | 0.23 | 0.17 | 0.24 | 0.83 | 4 | 2 v | LH | 6vLH |
| Guerrero | Monte                                   | 0.13 | 0.16 | 0.28 | 0.19 | 0.90 | 4 | 2 v | LH | 6vLH |
| Guerrero | Atlixac                                 | 0.23 | 0.16 | 0.22 | 0.20 | 0.88 | 4 | 3 v | LH | 7vLH |
| Guerrero | Atoyac de Álvarez<br>Ayutla de los      | 0.54 | 0.28 | 0.35 | 0.39 | 0.57 | 3 | 2 v | LH | 5vLH |
| Guerrero | Libres                                  | 0.31 | 0.20 | 0.32 | 0.28 | 0.76 | 4 | 4 b | HH | 8bHH |
| Guerrero | Azoyú                                   | 0.32 | 0.24 | 0.27 | 0.28 | 0.75 | 4 | 3 v | LH | 7vLH |
| Guerrero | Benito Juárez<br>Buenavista de          | 0.45 | 0.35 | 0.32 | 0.37 | 0.60 | 3 | 2 v | NS | 5vNS |
| Guerrero | Cuéllar<br>Coahuayutla de<br>José María | 0.47 | 0.31 | 0.37 | 0.38 | 0.58 | 3 | 2 v | NS | 5vNS |
| Guerrero | Izazaga                                 | 0.22 | 0.22 | 0.15 | 0.19 | 0.90 | 4 | 3 v | LH | 7vLH |
| Guerrero | Cocula                                  | 0.33 | 0.30 | 0.34 | 0.32 | 0.68 | 3 | 2 v | LH | 5vLH |
| Guerrero | Copala                                  | 0.36 | 0.25 | 0.37 | 0.33 | 0.67 | 3 | 2 v | LH | 5vLH |
| Guerrero | Copalillo                               | 0.31 | 0.17 | 0.09 | 0.19 | 0.90 | 4 | 2 v | LH | 6vLH |
| Guerrero | Copanatoyac                             | 0.18 | 0.17 | 0.23 | 0.19 | 0.90 | 4 | 2 v | LH | 6vLH |
| Guerrero | Coyuca de Benítez                       | 0.41 | 0.28 | 0.26 | 0.32 | 0.69 | 3 | 2 v | NS | 5vNS |
| Guerrero | Coyuca de Catalán                       | 0.33 | 0.25 | 0.15 | 0.24 | 0.82 | 4 | 3 v | LH | 7vLH |
| Guerrero | Cuajinicuilapa                          | 0.37 | 0.26 | 0.29 | 0.30 | 0.71 | 4 | 3 v | LH | 7vLH |
| Guerrero | San Luis Acatlán                        | 0.32 | 0.19 | 0.33 | 0.28 | 0.75 | 4 | 2 v | LH | 6vLH |
| Guerrero | San Marcos<br>San Miguel                | 0.39 | 0.26 | 0.22 | 0.29 | 0.74 | 4 | 2 v | LH | 6vLH |
| Guerrero | Totolapan                               | 0.28 | 0.18 | 0.15 | 0.21 | 0.88 | 4 | 2 v | LH | 6vLH |
| Guerrero | Taxco de Alarcón                        | 0.49 | 0.27 | 0.31 | 0.36 | 0.63 | 3 | 2 v | NS | 5vNS |
| Guerrero | Tecoanapa<br>Técpán de                  | 0.34 | 0.22 | 0.36 | 0.31 | 0.71 | 4 | 3 v | LH | 7vLH |
| Guerrero | Galeana                                 | 0.47 | 0.30 | 0.35 | 0.38 | 0.60 | 3 | 3 b | LH | 6bLH |
| Guerrero | Teloloapan<br>Tepecoacuilco de          | 0.38 | 0.25 | 0.18 | 0.27 | 0.77 | 4 | 2 v | LH | 6vLH |
| Guerrero | Trujano                                 | 0.37 | 0.28 | 0.24 | 0.30 | 0.72 | 4 | 2 v | LH | 6vLH |

|          |                      |      |      |      |      |      |   |     |    |      |
|----------|----------------------|------|------|------|------|------|---|-----|----|------|
| Guerrero | Tetipac              | 0.28 | 0.23 | 0.25 | 0.25 | 0.80 | 4 | 2 v | NS | 6vNS |
| Guerrero | Tixtla de Guerrero   | 0.49 | 0.27 | 0.37 | 0.38 | 0.59 | 3 | 3 b | LH | 6bLH |
| Guerrero | Tlacoachistlahuaca   | 0.19 | 0.19 | 0.41 | 0.26 | 0.78 | 4 | 2 v | LH | 6vLH |
| Guerrero | Tlacoapa             | 0.26 | 0.17 | 0.31 | 0.25 | 0.80 | 4 | 2 v | LH | 6vLH |
| Guerrero | Tlalchapa            | 0.31 | 0.28 | 0.13 | 0.24 | 0.82 | 4 | 3 v | LH | 7vLH |
| Guerrero | Tlapa de             |      |      |      |      |      |   |     |    |      |
| Guerrero | Comonfort            | 0.39 | 0.24 | 0.27 | 0.30 | 0.72 | 4 | 3 v | LH | 7vLH |
| Guerrero | Tlapehuala           | 0.42 | 0.28 | 0.21 | 0.31 | 0.71 | 4 | 3 v | LH | 7vLH |
| Guerrero | La Unión de          |      |      |      |      |      |   |     |    |      |
| Guerrero | Isidoro Montes de    |      |      |      |      |      |   |     |    |      |
| Guerrero | Oca                  | 0.35 | 0.30 | 0.20 | 0.28 | 0.75 | 4 | 2 v | LH | 6vLH |
| Guerrero | Xalpatláhuac         | 0.26 | 0.17 | 0.11 | 0.18 | 0.92 | 4 | 2 v | LH | 6vLH |
| Guerrero | Xochihuehuetlán      | 0.34 | 0.21 | 0.19 | 0.25 | 0.80 | 4 | 3 v | LH | 7vLH |
| Guerrero | Xochistlahuaca       | 0.27 | 0.19 | 0.41 | 0.29 | 0.74 | 4 | 2 v | LH | 6vLH |
| Guerrero | Zapotitlán Tablas    | 0.17 | 0.18 | 0.33 | 0.23 | 0.84 | 4 | 2 v | LH | 6vLH |
| Guerrero | Zirándaro            | 0.31 | 0.22 | 0.16 | 0.23 | 0.84 | 4 | 5 d | HH | 9dHH |
| Guerrero | Zitlala              | 0.31 | 0.18 | 0.18 | 0.22 | 0.85 | 4 | 2 v | LH | 6vLH |
| Guerrero | Eduardo Neri         | 0.49 | 0.25 | 0.26 | 0.33 | 0.66 | 3 | 2 v | LH | 5vLH |
| Guerrero | Acatepec             | 0.22 | 0.16 | 0.27 | 0.22 | 0.86 | 4 | 3 v | LH | 7vLH |
| Guerrero | Cualác               | 0.21 | 0.21 | 0.21 | 0.21 | 0.87 | 4 | 4 b | HH | 8bHH |
| Guerrero | Cuautepec            | 0.27 | 0.21 | 0.35 | 0.27 | 0.76 | 4 | 3 v | LH | 7vLH |
| Guerrero | Cuetzala del         |      |      |      |      |      |   |     |    |      |
| Guerrero | Progreso             | 0.18 | 0.21 | 0.29 | 0.23 | 0.84 | 4 | 2 v | LH | 6vLH |
| Guerrero | Cutzamala de         |      |      |      |      |      |   |     |    |      |
| Guerrero | Pinzón               | 0.32 | 0.28 | 0.19 | 0.26 | 0.79 | 4 | 3 v | LH | 7vLH |
| Guerrero | Chilapa de Álvarez   | 0.27 | 0.21 | 0.23 | 0.24 | 0.83 | 4 | 2 v | LH | 6vLH |
| Guerrero | Chilpancingo de      |      |      |      |      |      |   |     |    |      |
| Guerrero | los Bravo            | 0.60 | 0.33 | 0.35 | 0.43 | 0.51 | 2 | 2 b | NS | 4bNS |
| Guerrero | Florencio Villarreal | 0.42 | 0.26 | 0.31 | 0.33 | 0.67 | 3 | 3 b | LH | 6bLH |
| Guerrero | General Canuto A.    |      |      |      |      |      |   |     |    |      |
| Guerrero | Neri                 | 0.23 | 0.19 | 0.12 | 0.18 | 0.91 | 4 | 2 v | LH | 6vLH |
| Guerrero | General Heliodoro    |      |      |      |      |      |   |     |    |      |
| Guerrero | Castillo             | 0.28 | 0.17 | 0.19 | 0.21 | 0.86 | 4 | 2 v | LH | 6vLH |
| Guerrero | Huamuxtitlán         | 0.39 | 0.26 | 0.31 | 0.32 | 0.69 | 3 | 3 b | LH | 6bLH |

|          |                             |      |      |      |      |      |   |     |    |      |
|----------|-----------------------------|------|------|------|------|------|---|-----|----|------|
| Guerrero | Huitzuc de los Figueroa     | 0.46 | 0.26 | 0.23 | 0.32 | 0.69 | 3 | 3 b | NS | 6bNS |
| Guerrero | Iguala de la Independencia  | 0.58 | 0.34 | 0.32 | 0.41 | 0.53 | 2 | 2 b | LH | 4bLH |
| Guerrero | Igualapa                    | 0.33 | 0.21 | 0.37 | 0.30 | 0.72 | 4 | 3 v | LH | 7vLH |
| Guerrero | Ixcateopan de Cuauhtémoc    | 0.33 | 0.22 | 0.22 | 0.26 | 0.79 | 4 | 2 v | LH | 6vLH |
| Guerrero | Zihuatanejo de Azueta       | 0.61 | 0.35 | 0.34 | 0.43 | 0.50 | 2 | 3 d | LH | 5dLH |
| Guerrero | Juan R. Escudero            | 0.34 | 0.25 | 0.32 | 0.30 | 0.72 | 4 | 2 v | LH | 6vLH |
| Guerrero | Leonardo Bravo              | 0.49 | 0.19 | 0.38 | 0.35 | 0.63 | 3 | 2 v | LH | 5vLH |
| Guerrero | Malinaltepec                | 0.21 | 0.17 | 0.25 | 0.21 | 0.87 | 4 | 2 v | LH | 6vLH |
| Guerrero | Mártir de Cuilapan          | 0.25 | 0.21 | 0.28 | 0.25 | 0.81 | 4 | 2 v | LH | 6vLH |
| Guerrero | Metlatónoc                  | 0.09 | 0.16 | 0.40 | 0.21 | 0.86 | 4 | 2 v | LH | 6vLH |
| Guerrero | Mochitlán                   | 0.38 | 0.25 | 0.44 | 0.36 | 0.63 | 3 | 2 v | LH | 5vLH |
| Guerrero | Olinalá                     | 0.29 | 0.21 | 0.12 | 0.21 | 0.87 | 4 | 3 v | LH | 7vLH |
| Guerrero | Ometepec                    | 0.37 | 0.25 | 0.31 | 0.31 | 0.70 | 3 | 3 b | LH | 6bLH |
| Guerrero | Pedro Ascencio Alquisiras   | 0.22 | 0.18 | 0.09 | 0.17 | 0.95 | 4 | 2 v | LH | 6vLH |
| Guerrero | Petatlán                    | 0.53 | 0.29 | 0.36 | 0.39 | 0.56 | 3 | 3 b | LH | 6bLH |
| Guerrero | Pilcaya                     | 0.48 | 0.27 | 0.32 | 0.36 | 0.63 | 3 | 2 v | NS | 5vNS |
| Guerrero | Pungarabato                 | 0.49 | 0.32 | 0.31 | 0.37 | 0.60 | 3 | 4 d | HH | 7dHH |
| Guerrero | Quechultenango              | 0.27 | 0.19 | 0.35 | 0.27 | 0.77 | 4 | 2 v | LH | 6vLH |
| Guerrero | Tlalixtaquilla de Maldonado | 0.20 | 0.23 | 0.23 | 0.22 | 0.86 | 4 | 3 v | LH | 7vLH |
| Guerrero | Marquelia                   | 0.40 | 0.27 | 0.27 | 0.32 | 0.69 | 3 | 2 v | LH | 5vLH |
| Guerrero | Cochoapa el Grande          | 0.03 | 0.15 | 0.22 | 0.13 | 1.00 | 4 | 2 v | LH | 6vLH |
| Guerrero | José Joaquín de Herrera     | 0.20 | 0.17 | 0.24 | 0.20 | 0.89 | 4 | 2 v | LH | 6vLH |
| Guerrero | Juchitán                    | 0.34 | 0.23 | 0.25 | 0.27 | 0.77 | 4 | 3 v | LH | 7vLH |
| Guerrero | Iliatenco                   | 0.22 | 0.20 | 0.23 | 0.22 | 0.86 | 4 | 2 v | LH | 6vLH |
| Hidalgo  | Acatlán                     | 0.42 | 0.32 | 0.40 | 0.38 | 0.59 | 3 | 3 b | NS | 6bNS |
| Hidalgo  | Acaxochitlán                | 0.48 | 0.27 | 0.37 | 0.37 | 0.60 | 3 | 3 b | NS | 6bNS |
| Hidalgo  | Actopan                     | 0.74 | 0.35 | 0.37 | 0.48 | 0.41 | 2 | 3 d | NS | 5dNS |



|         |                         |      |      |      |      |      |   |     |    |      |
|---------|-------------------------|------|------|------|------|------|---|-----|----|------|
| Hidalgo | Agua Blanca de Iturbide | 0.43 | 0.29 | 0.43 | 0.38 | 0.59 | 3 | 3 b | NS | 6bNS |
| Hidalgo | Ajacuba                 | 0.60 | 0.35 | 0.38 | 0.44 | 0.48 | 2 | 3 d | LL | 5dLL |
| Hidalgo | Alfajayucan             | 0.47 | 0.31 | 0.37 | 0.38 | 0.58 | 3 | 2 v | NS | 5vNS |
| Hidalgo | Almoleya                | 0.65 | 0.33 | 0.32 | 0.44 | 0.49 | 2 | 3 d | NS | 5dNS |
| Hidalgo | Apan                    | 0.70 | 0.35 | 0.33 | 0.46 | 0.45 | 2 | 3 d | LL | 5dLL |
| Hidalgo | El Arenal               | 0.58 | 0.33 | 0.26 | 0.39 | 0.57 | 3 | 3 b | NS | 6bNS |
| Hidalgo | Atitalaquia             | 0.70 | 0.41 | 0.50 | 0.54 | 0.32 | 1 | 3 d | NS | 4dNS |
| Hidalgo | Atlaxco                 | 0.43 | 0.28 | 0.28 | 0.33 | 0.67 | 3 | 4 d | HH | 7dHH |
| Hidalgo | Atotonilco el Grande    | 0.57 | 0.33 | 0.39 | 0.43 | 0.50 | 2 | 2 b | NS | 4bNS |
| Hidalgo | Atotonilco de Tula      | 0.79 | 0.42 | 0.34 | 0.52 | 0.35 | 2 | 4 d | HL | 6dHL |
| Hidalgo | Calnali                 | 0.50 | 0.26 | 0.36 | 0.37 | 0.60 | 3 | 4 d | HH | 7dHH |
| Hidalgo | Cardonal                | 0.48 | 0.32 | 0.28 | 0.36 | 0.63 | 3 | 3 b | NS | 6bNS |
| Hidalgo | Cuautepec de Hinojosa   | 0.63 | 0.30 | 0.41 | 0.45 | 0.47 | 2 | 3 d | NS | 5dNS |
| Hidalgo | Chapantongo             | 0.54 | 0.32 | 0.29 | 0.39 | 0.58 | 3 | 3 b | NS | 6bNS |
| Hidalgo | Chapulhuacán            | 0.49 | 0.27 | 0.31 | 0.36 | 0.62 | 3 | 4 d | HH | 7dHH |
| Hidalgo | Chilcuautila            | 0.50 | 0.31 | 0.39 | 0.40 | 0.55 | 3 | 3 b | LL | 6bLL |
| Hidalgo | Eloxochitlán            | 0.44 | 0.26 | 0.41 | 0.37 | 0.60 | 3 | 3 b | LH | 6bLH |
| Hidalgo | Emiliano Zapata         | 0.71 | 0.38 | 0.34 | 0.48 | 0.43 | 2 | 4 d | HL | 6dHL |
| Hidalgo | Epazoyucan              | 0.56 | 0.40 | 0.31 | 0.42 | 0.51 | 2 | 3 d | NS | 5dNS |
| Hidalgo | Francisco I. Madero     | 0.70 | 0.35 | 0.57 | 0.54 | 0.33 | 1 | 3 d | NS | 4dNS |
| Hidalgo | Huasca de Ocampo        | 0.53 | 0.34 | 0.41 | 0.43 | 0.51 | 2 | 3 d | NS | 5dNS |
| Hidalgo | Huautla                 | 0.45 | 0.26 | 0.21 | 0.31 | 0.71 | 4 | 4 b | HH | 8bHH |
| Hidalgo | Huazalingo              | 0.43 | 0.22 | 0.33 | 0.33 | 0.68 | 3 | 4 d | NS | 7dNS |
| Hidalgo | Huehuetla               | 0.43 | 0.24 | 0.30 | 0.32 | 0.68 | 3 | 4 d | HH | 7dHH |
| Hidalgo | Huejutla de Reyes       | 0.58 | 0.31 | 0.31 | 0.40 | 0.56 | 3 | 5 d | NS | 8dNS |
| Hidalgo | Huichapan               | 0.63 | 0.37 | 0.40 | 0.46 | 0.45 | 2 | 2 b | NS | 4bNS |
| Hidalgo | Ixmiquilpan             | 0.58 | 0.34 | 0.40 | 0.44 | 0.48 | 2 | 4 d | NS | 6dNS |
| Hidalgo | Jacala de Ledezma       | 0.54 | 0.31 | 0.30 | 0.38 | 0.58 | 3 | 3 b | LH | 6bLH |
| Hidalgo | Jaltocán                | 0.50 | 0.25 | 0.33 | 0.36 | 0.62 | 3 | 4 d | NS | 7dNS |

|         |                   |      |      |      |      |      |   |     |    |      |
|---------|-------------------|------|------|------|------|------|---|-----|----|------|
| Hidalgo | Juárez Hidalgo    | 0.41 | 0.28 | 0.38 | 0.35 | 0.63 | 3 | 3 b | LH | 6bLH |
| Hidalgo | Lolotla           | 0.40 | 0.27 | 0.31 | 0.33 | 0.68 | 3 | 4 d | HH | 7dHH |
| Hidalgo | Metepéc           | 0.51 | 0.33 | 0.44 | 0.43 | 0.51 | 2 | 3 d | NS | 5dNS |
| Hidalgo | San Agustín       |      |      |      |      |      |   |     |    |      |
| Hidalgo | Metzquitlán       | 0.47 | 0.32 | 0.42 | 0.40 | 0.55 | 3 | 4 d | NS | 7dNS |
| Hidalgo | Metztitlán        | 0.48 | 0.31 | 0.35 | 0.38 | 0.58 | 3 | 2 v | NS | 5vNS |
| Hidalgo | Mineral del Chico | 0.47 | 0.35 | 0.33 | 0.38 | 0.59 | 3 | 3 b | NS | 6bNS |
| Hidalgo | Mineral del Monte | 0.78 | 0.36 | 0.28 | 0.48 | 0.43 | 2 | 3 d | NS | 5dNS |
| Hidalgo | La Misión         | 0.37 | 0.24 | 0.17 | 0.26 | 0.79 | 4 | 4 b | HH | 8bHH |
| Hidalgo | Mixquiahuala de   |      |      |      |      |      |   |     |    |      |
| Hidalgo | Juárez            | 0.69 | 0.36 | 0.57 | 0.54 | 0.32 | 1 | 3 d | NS | 4dNS |
| Hidalgo | Molango de        |      |      |      |      |      |   |     |    |      |
| Hidalgo | Escamilla         | 0.53 | 0.30 | 0.33 | 0.38 | 0.58 | 3 | 3 b | LH | 6bLH |
| Hidalgo | Nicolás Flores    | 0.45 | 0.25 | 0.31 | 0.34 | 0.66 | 3 | 2 v | LH | 5vLH |
| Hidalgo | Nopala de         |      |      |      |      |      |   |     |    |      |
| Hidalgo | Villagrán         | 0.49 | 0.35 | 0.44 | 0.42 | 0.51 | 2 | 2 b | LL | 4bLL |
| Hidalgo | Omitlán de Juárez | 0.57 | 0.34 | 0.38 | 0.43 | 0.50 | 2 | 3 d | NS | 5dNS |
| Hidalgo | San Felipe        |      |      |      |      |      |   |     |    |      |
| Hidalgo | Orizatlán         | 0.45 | 0.24 | 0.34 | 0.34 | 0.65 | 3 | 4 d | HH | 7dHH |
| Hidalgo | Pacula            | 0.40 | 0.27 | 0.21 | 0.30 | 0.73 | 4 | 2 v | LH | 6vLH |
| Hidalgo | Pachuca de Soto   | 0.85 | 0.43 | 0.34 | 0.54 | 0.32 | 1 | 2 d | NS | 3dNS |
| Hidalgo | Pisaflores        | 0.43 | 0.26 | 0.29 | 0.33 | 0.67 | 3 | 5 d | HH | 8dHH |
| Hidalgo | Progreso de       |      |      |      |      |      |   |     |    |      |
| Hidalgo | Obregón           | 0.74 | 0.38 | 0.48 | 0.53 | 0.33 | 1 | 3 d | NS | 4dNS |
| Hidalgo | Mineral de la     |      |      |      |      |      |   |     |    |      |
| Hidalgo | Reforma           | 0.80 | 0.47 | 0.37 | 0.55 | 0.31 | 1 | 3 d | NS | 4dNS |
| Hidalgo | San Agustín       |      |      |      |      |      |   |     |    |      |
| Hidalgo | Tlaxiaca          | 0.65 | 0.37 | 0.29 | 0.43 | 0.50 | 2 | 2 b | NS | 4bNS |
| Hidalgo | San Bartolo       |      |      |      |      |      |   |     |    |      |
| Hidalgo | Tutotepec         | 0.37 | 0.27 | 0.35 | 0.33 | 0.67 | 3 | 4 d | HH | 7dHH |
| Hidalgo | San Salvador      | 0.57 | 0.34 | 0.48 | 0.46 | 0.45 | 2 | 2 b | NS | 4bNS |
| Hidalgo | Santiago de Anaya | 0.49 | 0.34 | 0.33 | 0.39 | 0.58 | 3 | 3 b | NS | 6bNS |
| Hidalgo | Santiago          |      |      |      |      |      |   |     |    |      |
| Hidalgo | Tulantepec de     |      |      |      |      |      |   |     |    |      |
| Hidalgo | Lugo Guerrero     | 0.65 | 0.39 | 0.45 | 0.50 | 0.39 | 2 | 3 d | NS | 5dNS |
| Hidalgo | Singuilucan       | 0.56 | 0.32 | 0.30 | 0.39 | 0.57 | 3 | 3 b | LL | 6bLL |

|         |                          |      |      |      |      |      |   |     |    |      |
|---------|--------------------------|------|------|------|------|------|---|-----|----|------|
| Hidalgo | Tasquillo                | 0.51 | 0.31 | 0.38 | 0.40 | 0.55 | 3 | 2 v | NS | 5vNS |
| Hidalgo | Tecozautla               | 0.53 | 0.32 | 0.40 | 0.42 | 0.52 | 2 | 2 b | NS | 4bNS |
| Hidalgo | Tenango de Doria         | 0.45 | 0.28 | 0.39 | 0.37 | 0.60 | 3 | 4 d | NS | 7dNS |
| Hidalgo | Tepeapulco               | 0.76 | 0.39 | 0.35 | 0.50 | 0.39 | 2 | 3 d | NS | 5dNS |
| Hidalgo | Tepehuacán de Guerrero   | 0.38 | 0.22 | 0.23 | 0.28 | 0.76 | 4 | 4 b | NS | 8bNS |
| Hidalgo | Tepeji del Río de Ocampo | 0.73 | 0.40 | 0.31 | 0.48 | 0.42 | 2 | 4 d | HL | 6dHL |
| Hidalgo | Tepetitlán               | 0.54 | 0.37 | 0.35 | 0.42 | 0.52 | 2 | 3 d | NS | 5dNS |
| Hidalgo | Zempoala                 | 0.58 | 0.40 | 0.49 | 0.49 | 0.41 | 2 | 3 d | LL | 5dLL |
| Hidalgo | Zimapán                  | 0.57 | 0.34 | 0.29 | 0.40 | 0.55 | 3 | 2 v | NS | 5vNS |
| Hidalgo | Tetepango                | 0.70 | 0.30 | 0.55 | 0.52 | 0.35 | 2 | 3 d | LL | 5dLL |
| Hidalgo | Villa de Tezontepec      | 0.73 | 0.34 | 0.35 | 0.47 | 0.43 | 2 | 3 d | LL | 5dLL |
| Hidalgo | Tezontepec de Aldama     | 0.70 | 0.32 | 0.38 | 0.47 | 0.44 | 2 | 3 d | LL | 5dLL |
| Hidalgo | Tianguistengo            | 0.38 | 0.25 | 0.52 | 0.38 | 0.58 | 3 | 3 b | LH | 6bLH |
| Hidalgo | Tizayuca                 | 0.81 | 0.40 | 0.35 | 0.52 | 0.35 | 2 | 4 d | HL | 6dHL |
| Hidalgo | Tlahuelilpan             | 0.76 | 0.32 | 0.34 | 0.48 | 0.43 | 2 | 3 d | NS | 5dNS |
| Hidalgo | Tlahuiltepa              | 0.39 | 0.25 | 0.27 | 0.31 | 0.71 | 4 | 3 v | LH | 7vLH |
| Hidalgo | Tlanalapa                | 0.68 | 0.38 | 0.62 | 0.56 | 0.29 | 1 | 3 d | NS | 4dNS |
| Hidalgo | Tlanchinol               | 0.44 | 0.23 | 0.31 | 0.33 | 0.67 | 3 | 4 d | HH | 7dHH |
| Hidalgo | Tlaxcoapan               | 0.81 | 0.33 | 0.41 | 0.52 | 0.36 | 2 | 3 d | LL | 5dLL |
| Hidalgo | Tolcayuca                | 0.73 | 0.36 | 0.46 | 0.52 | 0.36 | 2 | 3 d | LL | 5dLL |
| Hidalgo | Tula de Allende          | 0.76 | 0.41 | 0.30 | 0.49 | 0.40 | 2 | 3 d | LL | 5dLL |
| Hidalgo | Tulancingo de Bravo      | 0.84 | 0.35 | 0.40 | 0.53 | 0.33 | 1 | 3 d | NS | 4dNS |
| Hidalgo | Xochiatipan              | 0.41 | 0.21 | 0.21 | 0.28 | 0.76 | 4 | 4 b | HH | 8bHH |
| Hidalgo | Xochicoatlán             | 0.45 | 0.27 | 0.39 | 0.37 | 0.60 | 3 | 3 b | NS | 6bNS |
| Hidalgo | Yahualica                | 0.40 | 0.21 | 0.23 | 0.28 | 0.75 | 4 | 4 b | HH | 8bHH |
| Hidalgo | Zacualtipán de Ángeles   | 0.72 | 0.33 | 0.38 | 0.48 | 0.43 | 2 | 5 d | NS | 7dNS |
| Hidalgo | Zapotlán de Juárez       | 0.75 | 0.33 | 0.33 | 0.47 | 0.44 | 2 | 3 d | LL | 5dLL |
| Jalisco | Acatic                   | 0.65 | 0.49 | 0.40 | 0.52 | 0.36 | 2 | 4 d | HL | 6dHL |
| Jalisco | Acatlán de Juárez        | 0.76 | 0.51 | 0.48 | 0.58 | 0.25 | 1 | 5 d | HL | 6dHL |

|         |                               |      |      |      |      |      |   |     |    |      |
|---------|-------------------------------|------|------|------|------|------|---|-----|----|------|
| Jalisco | Ahualulco de Mercado          | 0.81 | 0.50 | 0.51 | 0.60 | 0.21 | 1 | 3 d | LL | 4dLL |
| Jalisco | Amacueca                      | 0.70 | 0.44 | 0.52 | 0.55 | 0.30 | 1 | 4 d | HL | 5dHL |
| Jalisco | Amatitán                      | 0.73 | 0.49 | 0.46 | 0.56 | 0.29 | 1 | 5 d | HL | 6dHL |
| Jalisco | Ameca                         | 0.74 | 0.50 | 0.47 | 0.57 | 0.27 | 1 | 3 d | LL | 4dLL |
| Jalisco | San Juanito de Escobedo       | 0.63 | 0.46 | 0.50 | 0.53 | 0.33 | 1 | 3 d | LL | 4dLL |
| Jalisco | Arandas                       | 0.74 | 0.48 | 0.40 | 0.54 | 0.32 | 1 | 4 d | HL | 5dHL |
| Jalisco | El Arenal                     | 0.73 | 0.50 | 0.57 | 0.60 | 0.22 | 1 | 4 d | HL | 5dHL |
| Jalisco | Atemajac de Brizuela          | 0.69 | 0.36 | 0.43 | 0.49 | 0.40 | 2 | 3 d | LL | 5dLL |
| Jalisco | Atengo                        | 0.50 | 0.40 | 0.44 | 0.45 | 0.48 | 2 | 4 d | HL | 6dHL |
| Jalisco | Atenguillo                    | 0.52 | 0.54 | 0.44 | 0.50 | 0.39 | 2 | 3 d | NS | 5dNS |
| Jalisco | Atotonilco el Alto            | 0.71 | 0.49 | 0.48 | 0.56 | 0.29 | 1 | 4 d | HL | 5dHL |
| Jalisco | Atoyac                        | 0.72 | 0.43 | 0.46 | 0.54 | 0.32 | 1 | 4 d | HL | 5dHL |
| Jalisco | Autlán de Navarro             | 0.80 | 0.51 | 0.49 | 0.60 | 0.22 | 1 | 3 d | LL | 4dLL |
| Jalisco | Ayotlán                       | 0.72 | 0.43 | 0.54 | 0.56 | 0.28 | 1 | 4 d | HL | 5dHL |
| Jalisco | Ayutla                        | 0.65 | 0.43 | 0.42 | 0.50 | 0.38 | 2 | 5 d | HL | 7dHL |
| Jalisco | La Barca                      | 0.69 | 0.45 | 0.63 | 0.59 | 0.23 | 1 | 4 d | HL | 5dHL |
| Jalisco | Bolaños                       | 0.45 | 0.41 | 0.31 | 0.39 | 0.57 | 3 | 3 b | NS | 6bNS |
| Jalisco | Cabo Corrientes               | 0.68 | 0.42 | 0.34 | 0.48 | 0.42 | 2 | 4 d | HL | 6dHL |
| Jalisco | Casimiro Castillo             | 0.73 | 0.48 | 0.49 | 0.57 | 0.28 | 1 | 3 d | LL | 4dLL |
| Jalisco | Cihuatlán                     | 0.84 | 0.46 | 0.47 | 0.59 | 0.24 | 1 | 5 d | HL | 6dHL |
| Jalisco | Zapotlán el Grande            | 0.88 | 0.52 | 0.60 | 0.67 | 0.11 | 1 | 5 d | HL | 6dHL |
| Jalisco | Cocula                        | 0.70 | 0.48 | 0.50 | 0.56 | 0.28 | 1 | 4 d | HL | 5dHL |
| Jalisco | Colotlán                      | 0.78 | 0.48 | 0.45 | 0.57 | 0.27 | 1 | 4 d | NS | 5dNS |
| Jalisco | Concepción de Buenos Aires    | 0.76 | 0.44 | 0.47 | 0.56 | 0.29 | 1 | 4 d | HL | 5dHL |
| Jalisco | Cuautitlán de García Barragán | 0.46 | 0.41 | 0.41 | 0.42 | 0.51 | 2 | 3 d | LL | 5dLL |
| Jalisco | Cuautla                       | 0.54 | 0.47 | 0.43 | 0.48 | 0.42 | 2 | 4 d | HL | 6dHL |
| Jalisco | Cuquío                        | 0.64 | 0.42 | 0.28 | 0.45 | 0.48 | 2 | 4 d | HL | 6dHL |
| Jalisco | Chapala                       | 0.78 | 0.48 | 0.45 | 0.57 | 0.27 | 1 | 5 d | HL | 6dHL |
| Jalisco | Chimaltitán                   | 0.43 | 0.40 | 0.31 | 0.38 | 0.58 | 3 | 3 b | NS | 6bNS |

|         |                                  |      |      |      |      |      |   |     |    |      |
|---------|----------------------------------|------|------|------|------|------|---|-----|----|------|
| Jalisco | Chiquilistlán                    | 0.62 | 0.37 | 0.45 | 0.48 | 0.42 | 2 | 3 d | LL | 5dLL |
| Jalisco | Degollado                        | 0.72 | 0.45 | 0.45 | 0.54 | 0.32 | 1 | 4 d | NS | 5dNS |
| Jalisco | Ejutla                           | 0.57 | 0.51 | 0.45 | 0.51 | 0.37 | 2 | 4 d | HL | 6dHL |
| Jalisco | Encarnación de<br>Díaz           | 0.71 | 0.46 | 0.51 | 0.56 | 0.29 | 1 | 4 d | HL | 5dHL |
| Jalisco | Etzatlán                         | 0.72 | 0.46 | 0.46 | 0.55 | 0.31 | 1 | 3 d | LL | 4dLL |
| Jalisco | El Grullo                        | 0.79 | 0.49 | 0.54 | 0.60 | 0.21 | 1 | 3 d | LL | 4dLL |
| Jalisco | Guachinango                      | 0.50 | 0.46 | 0.39 | 0.45 | 0.47 | 2 | 3 d | LL | 5dLL |
| Jalisco | Guadalajara                      | 0.98 | 0.55 | 0.46 | 0.66 | 0.11 | 1 | 4 d | HL | 5dHL |
| Jalisco | Hostotipaquillo                  | 0.60 | 0.39 | 0.40 | 0.46 | 0.45 | 2 | 5 d | HL | 7dHL |
| Jalisco | Huejúcar                         | 0.68 | 0.46 | 0.45 | 0.53 | 0.33 | 1 | 4 d | NS | 5dNS |
| Jalisco | Huejuquilla el Alto              | 0.63 | 0.42 | 0.40 | 0.48 | 0.42 | 2 | 5 d | NS | 7dNS |
| Jalisco | La Huerta                        | 0.70 | 0.50 | 0.40 | 0.54 | 0.33 | 1 | 3 d | LL | 4dLL |
| Jalisco | Ixtlahuacán de los<br>Membrillos | 0.76 | 0.52 | 0.61 | 0.63 | 0.17 | 1 | 5 d | HL | 6dHL |
| Jalisco | Ixtlahuacán del Río              | 0.68 | 0.46 | 0.34 | 0.49 | 0.40 | 2 | 3 d | LL | 5dLL |
| Jalisco | Jalostotitlán                    | 0.77 | 0.48 | 0.46 | 0.57 | 0.28 | 1 | 4 d | HL | 5dHL |
| Jalisco | Jamay                            | 0.74 | 0.46 | 0.62 | 0.60 | 0.21 | 1 | 4 d | HL | 5dHL |
| Jalisco | Jesús María                      | 0.66 | 0.47 | 0.40 | 0.51 | 0.37 | 2 | 4 d | HL | 6dHL |
| Jalisco | Jilotlán de los<br>Dolores       | 0.50 | 0.44 | 0.29 | 0.41 | 0.54 | 3 | 4 d | NS | 7dNS |
| Jalisco | Jocotepec                        | 0.75 | 0.46 | 0.46 | 0.55 | 0.30 | 1 | 4 d | HL | 5dHL |
| Jalisco | Juanacatlán                      | 0.75 | 0.53 | 0.50 | 0.59 | 0.23 | 1 | 4 d | HL | 5dHL |
| Jalisco | Juchitlán                        | 0.65 | 0.45 | 0.44 | 0.51 | 0.37 | 2 | 3 d | LL | 5dLL |
| Jalisco | Lagos de Moreno                  | 0.71 | 0.49 | 0.46 | 0.55 | 0.30 | 1 | 5 d | HL | 6dHL |
| Jalisco | El Limón                         | 0.67 | 0.51 | 0.49 | 0.56 | 0.29 | 1 | 3 d | LL | 4dLL |
| Jalisco | Magdalena                        | 0.72 | 0.46 | 0.46 | 0.55 | 0.30 | 1 | 3 d | LL | 4dLL |
| Jalisco | Santa María del<br>Oro           | 0.41 | 0.39 | 0.26 | 0.35 | 0.63 | 3 | 4 d | NS | 7dNS |
| Jalisco | La Manzanilla de<br>la Paz       | 0.75 | 0.46 | 0.45 | 0.55 | 0.30 | 1 | 4 d | HL | 5dHL |
| Jalisco | Mascota                          | 0.75 | 0.48 | 0.43 | 0.56 | 0.29 | 1 | 3 d | NS | 4dNS |
| Jalisco | Mazamitla                        | 0.77 | 0.45 | 0.42 | 0.55 | 0.30 | 1 | 4 d | HL | 5dHL |
| Jalisco | Mexticacán                       | 0.68 | 0.42 | 0.42 | 0.51 | 0.38 | 2 | 5 d | NS | 7dNS |

|         |                                 |      |      |      |      |      |   |     |    |      |
|---------|---------------------------------|------|------|------|------|------|---|-----|----|------|
| Jalisco | Mezquitic                       | 0.49 | 0.38 | 0.27 | 0.38 | 0.59 | 3 | 4 d | NS | 7dNS |
| Jalisco | Mixtlán                         | 0.53 | 0.49 | 0.43 | 0.48 | 0.41 | 2 | 3 d | LL | 5dLL |
| Jalisco | Ocotlán                         | 0.89 | 0.52 | 0.59 | 0.66 | 0.11 | 1 | 3 d | LL | 4dLL |
| Jalisco | Ojuelos de Jalisco              | 0.69 | 0.42 | 0.42 | 0.51 | 0.37 | 2 | 4 d | NS | 6dNS |
| Jalisco | Pihuamo                         | 0.69 | 0.47 | 0.42 | 0.53 | 0.34 | 1 | 3 d | LL | 4dLL |
| Jalisco | Poncitlán                       | 0.69 | 0.46 | 0.47 | 0.54 | 0.32 | 1 | 5 d | HL | 6dHL |
| Jalisco | Puerto Vallarta                 | 0.81 | 0.52 | 0.48 | 0.60 | 0.21 | 1 | 3 d | LL | 4dLL |
| Jalisco | Villa Purificación              | 0.65 | 0.44 | 0.41 | 0.50 | 0.39 | 2 | 3 d | LL | 5dLL |
| Jalisco | Quitupan                        | 0.50 | 0.45 | 0.32 | 0.42 | 0.52 | 2 | 4 d | NS | 6dNS |
| Jalisco | El Salto                        | 0.79 | 0.49 | 0.40 | 0.56 | 0.28 | 1 | 4 d | HL | 5dHL |
| Jalisco | San Cristóbal de la<br>Barranca | 0.49 | 0.45 | 0.34 | 0.43 | 0.51 | 2 | 5 d | NS | 7dNS |
| Jalisco | San Diego de<br>Alejandría      | 0.74 | 0.43 | 0.46 | 0.54 | 0.31 | 1 | 5 d | HL | 6dHL |
| Jalisco | San Juan de los<br>Lagos        | 0.77 | 0.47 | 0.45 | 0.57 | 0.28 | 1 | 4 d | HL | 5dHL |
| Jalisco | San Julián                      | 0.71 | 0.48 | 0.45 | 0.55 | 0.31 | 1 | 5 d | HL | 6dHL |
| Jalisco | San Marcos                      | 0.72 | 0.45 | 0.44 | 0.54 | 0.32 | 1 | 3 d | LL | 4dLL |
| Jalisco | San Martín de<br>Bolaños        | 0.60 | 0.50 | 0.39 | 0.50 | 0.39 | 2 | 4 d | NS | 6dNS |
| Jalisco | San Martín Hidalgo              | 0.68 | 0.49 | 0.53 | 0.57 | 0.27 | 1 | 3 d | LL | 4dLL |
| Jalisco | San Miguel el Alto              | 0.79 | 0.48 | 0.43 | 0.57 | 0.27 | 1 | 5 d | HL | 6dHL |
| Jalisco | Gómez Farías                    | 0.85 | 0.45 | 0.48 | 0.60 | 0.23 | 1 | 5 d | HL | 6dHL |
| Jalisco | San Sebastián del<br>Oeste      | 0.57 | 0.42 | 0.38 | 0.46 | 0.46 | 2 | 3 d | LL | 5dLL |
| Jalisco | Santa María de los<br>Ángeles   | 0.49 | 0.45 | 0.45 | 0.46 | 0.45 | 2 | 4 d | NS | 6dNS |
| Jalisco | Sayula                          | 0.79 | 0.48 | 0.58 | 0.61 | 0.20 | 1 | 5 d | HL | 6dHL |
| Jalisco | Tala                            | 0.77 | 0.51 | 0.52 | 0.60 | 0.22 | 1 | 4 d | HL | 5dHL |
| Jalisco | Talpa de Allende                | 0.71 | 0.43 | 0.37 | 0.50 | 0.39 | 2 | 3 d | LL | 5dLL |
| Jalisco | Tamazula de<br>Gordiano         | 0.75 | 0.51 | 0.45 | 0.57 | 0.27 | 1 | 4 d | HL | 5dHL |
| Jalisco | Tapalpa                         | 0.70 | 0.43 | 0.40 | 0.51 | 0.37 | 2 | 3 d | LL | 5dLL |
| Jalisco | Tecalitlán                      | 0.75 | 0.45 | 0.42 | 0.54 | 0.32 | 1 | 4 d | HL | 5dHL |
| Jalisco | Tecolotlán                      | 0.67 | 0.47 | 0.44 | 0.53 | 0.34 | 1 | 3 d | LL | 4dLL |

|         |                         |      |      |      |      |      |   |     |    |      |
|---------|-------------------------|------|------|------|------|------|---|-----|----|------|
| Jalisco | Techaluta de Montenegro | 0.62 | 0.46 | 0.48 | 0.52 | 0.35 | 2 | 3 d | LL | 5dLL |
| Jalisco | Tenamaxtlán             | 0.75 | 0.44 | 0.45 | 0.55 | 0.31 | 1 | 4 d | HL | 5dHL |
| Jalisco | Teocaltiche             | 0.66 | 0.45 | 0.44 | 0.52 | 0.36 | 2 | 4 d | HL | 6dHL |
| Jalisco | Teocuitatlán de Corona  | 0.65 | 0.44 | 0.48 | 0.52 | 0.35 | 1 | 4 d | HL | 5dHL |
| Jalisco | Tepatitlán de Morelos   | 0.79 | 0.52 | 0.44 | 0.58 | 0.25 | 1 | 3 d | LL | 4dLL |
| Jalisco | Tequila                 | 0.77 | 0.48 | 0.43 | 0.56 | 0.29 | 1 | 4 d | HL | 5dHL |
| Jalisco | Teuchitlán              | 0.65 | 0.51 | 0.53 | 0.56 | 0.28 | 1 | 3 d | LL | 4dLL |
| Jalisco | Tizapán el Alto         | 0.74 | 0.42 | 0.50 | 0.56 | 0.29 | 1 | 5 d | HL | 6dHL |
| Jalisco | Tlajomulco de Zúñiga    | 0.82 | 0.51 | 0.44 | 0.59 | 0.24 | 1 | 4 d | HL | 5dHL |
| Jalisco | San Pedro Tlaquepaque   | 0.85 | 0.52 | 0.52 | 0.63 | 0.17 | 1 | 4 d | HL | 5dHL |
| Jalisco | Tolimán                 | 0.59 | 0.42 | 0.44 | 0.48 | 0.42 | 2 | 3 d | LL | 5dLL |
| Jalisco | Tomatlán                | 0.65 | 0.46 | 0.41 | 0.51 | 0.37 | 2 | 5 d | HL | 7dHL |
| Jalisco | Tonalá                  | 0.80 | 0.50 | 0.41 | 0.57 | 0.27 | 1 | 3 d | LL | 4dLL |
| Jalisco | Tonaya                  | 0.69 | 0.50 | 0.46 | 0.55 | 0.31 | 1 | 3 d | LL | 4dLL |
| Jalisco | Tonila                  | 0.85 | 0.46 | 0.47 | 0.59 | 0.23 | 1 | 4 d | HL | 5dHL |
| Jalisco | Totatiche               | 0.51 | 0.48 | 0.41 | 0.47 | 0.44 | 2 | 5 d | NS | 7dNS |
| Jalisco | Tototlán                | 0.68 | 0.47 | 0.52 | 0.56 | 0.29 | 1 | 4 d | HL | 5dHL |
| Jalisco | Tuxcacuesco             | 0.58 | 0.47 | 0.44 | 0.50 | 0.39 | 2 | 3 d | LL | 5dLL |
| Jalisco | Tuxcueca                | 0.73 | 0.45 | 0.45 | 0.54 | 0.32 | 1 | 5 d | HL | 6dHL |
| Jalisco | Tuxpan                  | 0.80 | 0.46 | 0.52 | 0.59 | 0.23 | 1 | 4 d | HL | 5dHL |
| Jalisco | Unión de San Antonio    | 0.62 | 0.48 | 0.41 | 0.50 | 0.39 | 2 | 5 d | HL | 7dHL |
| Jalisco | Unión de Tula           | 0.71 | 0.47 | 0.48 | 0.55 | 0.30 | 1 | 5 d | HL | 6dHL |
| Jalisco | Valle de Guadalupe      | 0.77 | 0.52 | 0.43 | 0.57 | 0.26 | 1 | 4 d | HL | 5dHL |
| Jalisco | Valle de Juárez         | 0.79 | 0.44 | 0.38 | 0.54 | 0.32 | 1 | 4 d | HL | 5dHL |
| Jalisco | San Gabriel             | 0.68 | 0.47 | 0.45 | 0.53 | 0.33 | 1 | 4 d | HL | 5dHL |
| Jalisco | Villa Corona            | 0.76 | 0.48 | 0.48 | 0.57 | 0.26 | 1 | 5 d | HL | 6dHL |
| Jalisco | Villa Guerrero          | 0.63 | 0.40 | 0.32 | 0.45 | 0.47 | 2 | 4 d | NS | 6dNS |
| Jalisco | Villa Hidalgo           | 0.79 | 0.45 | 0.46 | 0.57 | 0.28 | 1 | 5 d | NS | 6dNS |



|         |                             |      |      |      |      |      |   |     |    |      |
|---------|-----------------------------|------|------|------|------|------|---|-----|----|------|
| Jalisco | Cañadas de Obregón          | 0.59 | 0.47 | 0.42 | 0.49 | 0.40 | 2 | 4 d | NS | 6dNS |
| Jalisco | Yahualica de González Gallo | 0.71 | 0.48 | 0.37 | 0.52 | 0.35 | 2 | 5 d | NS | 7dNS |
| Jalisco | Zacoalco de Torres          | 0.74 | 0.46 | 0.46 | 0.55 | 0.30 | 1 | 4 d | HL | 5dHL |
| Jalisco | Zapopan                     | 0.86 | 0.55 | 0.44 | 0.62 | 0.19 | 1 | 3 d | LL | 4dLL |
| Jalisco | Zapotiltic                  | 0.80 | 0.49 | 0.58 | 0.63 | 0.18 | 1 | 5 d | HL | 6dHL |
| Jalisco | Zapotitlán de Vadillo       | 0.70 | 0.40 | 0.44 | 0.52 | 0.36 | 2 | 4 d | HL | 6dHL |
| Jalisco | Zapotlán del Rey            | 0.60 | 0.46 | 0.55 | 0.54 | 0.33 | 1 | 4 d | HL | 5dHL |
| Jalisco | Zapotlanejo                 | 0.72 | 0.47 | 0.41 | 0.53 | 0.33 | 1 | 4 d | HL | 5dHL |
| Jalisco | San Ignacio Cerro Gordo     | 0.74 | 0.44 | 0.31 | 0.50 | 0.39 | 2 | 4 d | HL | 6dHL |
| México  | Acambay de Ruíz             |      |      |      |      |      |   |     |    |      |
| México  | Castañeda                   | 0.60 | 0.53 | 0.24 | 0.46 | 0.46 | 2 | 4 d | HL | 6dHL |
| México  | Acolman                     | 0.78 | 0.61 | 0.42 | 0.60 | 0.21 | 1 | 5 d | HL | 6dHL |
| México  | Aculco                      | 0.62 | 0.58 | 0.37 | 0.52 | 0.35 | 1 | 4 d | HL | 5dHL |
| México  | Almoloya de Alquisiras      | 0.58 | 0.54 | 0.32 | 0.48 | 0.42 | 2 | 2 b | LL | 4bLL |
| México  | Almoloya de Juárez          | 0.74 | 0.58 | 0.40 | 0.57 | 0.27 | 1 | 3 d | LL | 4dLL |
| México  | Almoloya del Río            | 0.76 | 0.58 | 0.46 | 0.60 | 0.21 | 1 | 3 d | LL | 4dLL |
| México  | Amanalco                    | 0.62 | 0.54 | 0.33 | 0.49 | 0.40 | 2 | 2 b | LL | 4bLL |
| México  | Amatepec                    | 0.49 | 0.55 | 0.15 | 0.40 | 0.56 | 3 | 2 v | LH | 5vLH |
| México  | Amecameca                   | 0.77 | 0.60 | 0.37 | 0.58 | 0.25 | 1 | 3 d | LL | 4dLL |
| México  | Apaxco                      | 0.76 | 0.61 | 0.36 | 0.58 | 0.25 | 1 | 3 d | LL | 4dLL |
| México  | Atenco                      | 0.77 | 0.58 | 0.40 | 0.59 | 0.24 | 1 | 4 d | HL | 5dHL |
| México  | Atizapán                    | 0.76 | 0.57 | 0.46 | 0.59 | 0.23 | 1 | 3 d | LL | 4dLL |
| México  | Atizapán de Zaragoza        | 0.90 | 0.67 | 0.35 | 0.64 | 0.16 | 1 | 4 d | HL | 5dHL |
| México  | Atlacomulco                 | 0.77 | 0.59 | 0.47 | 0.61 | 0.21 | 1 | 3 d | LL | 4dLL |
| México  | Atlautla                    | 0.78 | 0.52 | 0.39 | 0.56 | 0.28 | 1 | 2 d | LL | 3dLL |
| México  | Axapusco                    | 0.67 | 0.58 | 0.32 | 0.52 | 0.35 | 1 | 3 d | LL | 4dLL |
| México  | Ayapango                    | 0.71 | 0.62 | 0.41 | 0.58 | 0.25 | 1 | 3 d | LL | 4dLL |

|        |                         |      |      |      |      |      |   |     |    |      |
|--------|-------------------------|------|------|------|------|------|---|-----|----|------|
| México | Calimaya                | 0.78 | 0.62 | 0.44 | 0.61 | 0.20 | 1 | 3 d | LL | 4dLL |
| México | Capulhuac               | 0.80 | 0.59 | 0.45 | 0.62 | 0.19 | 1 | 3 d | LL | 4dLL |
| México | Coacalco de Berriozábal | 0.88 | 0.70 | 0.38 | 0.65 | 0.13 | 1 | 4 d | HL | 5dHL |
| México | Coatepec Harinas        | 0.59 | 0.58 | 0.44 | 0.54 | 0.32 | 1 | 2 d | LL | 3dLL |
| México | Cocotitlán              | 0.79 | 0.64 | 0.40 | 0.61 | 0.20 | 1 | 4 d | HL | 5dHL |
| México | Coyotepec               | 0.82 | 0.61 | 0.42 | 0.62 | 0.19 | 1 | 4 d | HL | 5dHL |
| México | Cuautitlán              | 0.84 | 0.69 | 0.59 | 0.70 | 0.05 | 1 | 5 d | HL | 6dHL |
| México | Chalco                  | 0.80 | 0.59 | 0.38 | 0.59 | 0.24 | 1 | 4 d | HL | 5dHL |
| México | Chapa de Mota           | 0.61 | 0.55 | 0.28 | 0.48 | 0.42 | 2 | 4 d | HL | 6dHL |
| México | Chapultepec             | 0.85 | 0.64 | 0.45 | 0.65 | 0.14 | 1 | 3 d | LL | 4dLL |
| México | Chiautla                | 0.78 | 0.62 | 0.54 | 0.64 | 0.14 | 1 | 5 d | HL | 6dHL |
| México | Chicoloapan             | 0.80 | 0.65 | 0.35 | 0.60 | 0.22 | 1 | 3 d | LL | 4dLL |
| México | Chiconcuac              | 0.85 | 0.57 | 0.59 | 0.67 | 0.10 | 1 | 5 d | HL | 6dHL |
| México | Chimalhuacán            | 0.84 | 0.56 | 0.32 | 0.57 | 0.27 | 1 | 4 d | HL | 5dHL |
| México | Donato Guerra           | 0.55 | 0.49 | 0.33 | 0.46 | 0.46 | 2 | 2 b | NS | 4bNS |
| México | Ecatepec de Morelos     | 0.93 | 0.64 | 0.35 | 0.64 | 0.15 | 1 | 5 d | HL | 6dHL |
| México | Ecatzingo               | 0.64 | 0.52 | 0.42 | 0.53 | 0.34 | 1 | 2 d | LL | 3dLL |
| México | Huehuetoca              | 0.85 | 0.64 | 0.39 | 0.62 | 0.18 | 1 | 4 d | HL | 5dHL |
| México | Hueypoxtla              | 0.76 | 0.55 | 0.33 | 0.55 | 0.31 | 1 | 3 d | LL | 4dLL |
| México | Huixquilucan            | 0.84 | 0.66 | 0.31 | 0.60 | 0.21 | 1 | 5 d | HL | 6dHL |
| México | Isidro Fabela           | 0.52 | 0.64 | 0.33 | 0.50 | 0.39 | 2 | 4 d | HL | 6dHL |
| México | Ixtapaluca              | 0.80 | 0.64 | 0.33 | 0.59 | 0.24 | 1 | 3 d | LL | 4dLL |
| México | Ixtapan de la Sal       | 0.67 | 0.57 | 0.40 | 0.55 | 0.31 | 1 | 2 d | LL | 3dLL |
| México | Ixtapan del Oro         | 0.49 | 0.49 | 0.35 | 0.44 | 0.48 | 2 | 2 b | NS | 4bNS |
| México | Ixtlahuaca              | 0.69 | 0.53 | 0.50 | 0.57 | 0.26 | 1 | 3 d | LL | 4dLL |
| México | Xalatlaco               | 0.72 | 0.57 | 0.43 | 0.57 | 0.26 | 1 | 3 d | LL | 4dLL |
| México | Jaltenco                | 0.86 | 0.63 | 0.33 | 0.61 | 0.21 | 1 | 5 d | HL | 6dHL |
| México | Jilotepec               | 0.73 | 0.59 | 0.32 | 0.55 | 0.31 | 1 | 3 d | LL | 4dLL |
| México | Jilotzingo              | 0.72 | 0.63 | 0.30 | 0.55 | 0.30 | 1 | 5 d | HL | 6dHL |
| México | Jiquipilco              | 0.66 | 0.54 | 0.51 | 0.57 | 0.27 | 1 | 3 d | LL | 4dLL |
| México | Jocotitlán              | 0.71 | 0.60 | 0.50 | 0.60 | 0.21 | 1 | 3 d | LL | 4dLL |

|        |                             |      |      |      |      |      |   |     |    |      |
|--------|-----------------------------|------|------|------|------|------|---|-----|----|------|
| México | Joquicingo                  | 0.75 | 0.54 | 0.38 | 0.56 | 0.29 | 1 | 2 d | LL | 3dLL |
| México | Juchitepec                  | 0.81 | 0.54 | 0.45 | 0.60 | 0.22 | 1 | 2 d | LL | 3dLL |
| México | Lerma                       | 0.79 | 0.61 | 0.43 | 0.61 | 0.20 | 1 | 4 d | HL | 5dHL |
| México | Malinalco                   | 0.66 | 0.53 | 0.38 | 0.53 | 0.34 | 1 | 2 d | LL | 3dLL |
| México | Papalotla                   | 0.81 | 0.63 | 0.47 | 0.64 | 0.16 | 1 | 4 d | HL | 5dHL |
| México | La Paz                      | 0.81 | 0.59 | 0.39 | 0.60 | 0.22 | 1 | 4 d | HL | 5dHL |
| México | Polotitlán                  | 0.61 | 0.63 | 0.42 | 0.55 | 0.30 | 1 | 4 d | HL | 5dHL |
| México | Rayón                       | 0.77 | 0.64 | 0.37 | 0.59 | 0.23 | 1 | 2 d | LL | 3dLL |
| México | San Antonio la Isla         | 0.86 | 0.63 | 0.36 | 0.61 | 0.20 | 1 | 3 d | LL | 4dLL |
| México | San Felipe del Progreso     | 0.60 | 0.50 | 0.20 | 0.43 | 0.50 | 2 | 3 d | LL | 5dLL |
| México | San Martín de las Pirámides | 0.71 | 0.63 | 0.42 | 0.59 | 0.24 | 1 | 4 d | HL | 5dHL |
| México | Melchor Ocampo              | 0.79 | 0.63 | 0.31 | 0.58 | 0.26 | 1 | 5 d | HL | 6dHL |
| México | Metepec                     | 0.94 | 0.69 | 0.35 | 0.66 | 0.12 | 1 | 3 d | LL | 4dLL |
| México | Teoloyucan                  | 0.80 | 0.61 | 0.42 | 0.61 | 0.20 | 1 | 4 d | HL | 5dHL |
| México | Teotihuacán                 | 0.78 | 0.61 | 0.31 | 0.57 | 0.27 | 1 | 4 d | HL | 5dHL |
| México | Tepetlaoxtoc                | 0.72 | 0.60 | 0.42 | 0.58 | 0.26 | 1 | 4 d | HL | 5dHL |
| México | Tepetlixpa                  | 0.74 | 0.57 | 0.32 | 0.54 | 0.31 | 1 | 2 d | LL | 3dLL |
| México | Tepotzotlán                 | 0.82 | 0.64 | 0.32 | 0.59 | 0.23 | 1 | 4 d | HL | 5dHL |
| México | Tequixquiac                 | 0.82 | 0.57 | 0.50 | 0.63 | 0.18 | 1 | 4 d | HL | 5dHL |
| México | Texcaltitlán                | 0.56 | 0.55 | 0.35 | 0.49 | 0.41 | 2 | 3 d | LL | 5dLL |
| México | Mexicaltzingo               | 0.80 | 0.60 | 0.71 | 0.70 | 0.05 | 1 | 3 d | LL | 4dLL |
| México | Morelos                     | 0.61 | 0.53 | 0.26 | 0.47 | 0.44 | 2 | 3 d | LL | 5dLL |
| México | Naucalpan de Juárez         | 0.91 | 0.66 | 0.53 | 0.70 | 0.06 | 1 | 5 d | HL | 6dHL |
| México | Nezahualcóyotl              | 0.85 | 0.65 | 0.44 | 0.64 | 0.15 | 1 | 5 d | HL | 6dHL |
| México | Nextlalpan                  | 0.75 | 0.60 | 0.38 | 0.58 | 0.25 | 1 | 4 d | HL | 5dHL |
| México | Nicolás Romero              | 0.85 | 0.63 | 0.44 | 0.64 | 0.15 | 1 | 4 d | HL | 5dHL |
| México | Nopaltepec                  | 0.82 | 0.59 | 0.36 | 0.59 | 0.24 | 1 | 3 d | LL | 4dLL |
| México | Ocoyoacac                   | 0.78 | 0.62 | 0.43 | 0.61 | 0.20 | 1 | 4 d | HL | 5dHL |
| México | Ocuilán                     | 0.60 | 0.56 | 0.34 | 0.50 | 0.38 | 2 | 2 b | LL | 4bLL |
| México | El Oro                      | 0.56 | 0.54 | 0.33 | 0.48 | 0.43 | 2 | 3 d | NS | 5dNS |
| México | Otumba                      | 0.66 | 0.58 | 0.35 | 0.53 | 0.34 | 1 | 4 d | HL | 5dHL |

|        |                                           |      |      |      |      |      |   |     |    |      |
|--------|-------------------------------------------|------|------|------|------|------|---|-----|----|------|
| México | Otzoalapan                                | 0.52 | 0.51 | 0.36 | 0.46 | 0.45 | 2 | 2 b | NS | 4bNS |
| México | Otzoalotepec                              | 0.71 | 0.56 | 0.44 | 0.57 | 0.27 | 1 | 4 d | HL | 5dHL |
| México | Ozumba                                    | 0.76 | 0.55 | 0.35 | 0.55 | 0.30 | 1 | 2 d | LL | 3dLL |
| México | Timilpan                                  | 0.58 | 0.60 | 0.31 | 0.50 | 0.39 | 2 | 3 d | LL | 5dLL |
| México | Tlalmanalco                               | 0.77 | 0.63 | 0.33 | 0.58 | 0.26 | 1 | 4 d | HL | 5dHL |
| México | Tlalnepantla de<br>Baz                    | 0.83 | 0.67 | 0.50 | 0.67 | 0.11 | 1 | 4 d | HL | 5dHL |
| México | Tlatlaya                                  | 0.44 | 0.52 | 0.17 | 0.38 | 0.59 | 3 | 2 v | LH | 5vLH |
| México | Toluca                                    | 0.93 | 0.63 | 0.53 | 0.70 | 0.05 | 1 | 3 d | LL | 4dLL |
| México | Tonatico                                  | 0.71 | 0.60 | 0.40 | 0.57 | 0.27 | 1 | 2 d | NS | 3dNS |
| México | Tultepec                                  | 0.86 | 0.63 | 0.39 | 0.63 | 0.17 | 1 | 4 d | HL | 5dHL |
| México | Tultitlán                                 | 0.83 | 0.66 | 0.43 | 0.64 | 0.15 | 1 | 4 d | HL | 5dHL |
| México | Valle de Bravo                            | 0.70 | 0.57 | 0.55 | 0.61 | 0.21 | 1 | 2 d | NS | 3dNS |
| México | Villa de Allende                          | 0.52 | 0.48 | 0.36 | 0.45 | 0.46 | 2 | 2 b | NS | 4bNS |
| México | Villa del Carbón                          | 0.66 | 0.54 | 0.29 | 0.50 | 0.39 | 2 | 3 d | LL | 5dLL |
| México | Villa Guerrero                            | 0.66 | 0.56 | 0.41 | 0.54 | 0.31 | 1 | 2 d | LL | 3dLL |
| México | Villa Victoria                            | 0.57 | 0.54 | 0.20 | 0.44 | 0.49 | 2 | 2 b | LL | 4bLL |
| México | Xonacatlán                                | 0.76 | 0.58 | 0.41 | 0.58 | 0.25 | 1 | 4 d | HL | 5dHL |
| México | Zacazonapan                               | 0.69 | 0.54 | 0.39 | 0.54 | 0.32 | 1 | 2 d | NS | 3dNS |
| México | Zacualpan                                 | 0.54 | 0.51 | 0.28 | 0.44 | 0.48 | 2 | 2 b | NS | 4bNS |
| México | Zinacantepec                              | 0.80 | 0.59 | 0.37 | 0.58 | 0.25 | 1 | 3 d | LL | 4dLL |
| México | Zumpahuacán                               | 0.53 | 0.51 | 0.51 | 0.51 | 0.36 | 2 | 2 b | LL | 4bLL |
| México | Zumpango                                  | 0.81 | 0.62 | 0.39 | 0.61 | 0.21 | 1 | 4 d | HL | 5dHL |
| México | Cuautitlán Izcalli                        | 0.91 | 0.70 | 0.33 | 0.65 | 0.14 | 1 | 4 d | HL | 5dHL |
| México | San Mateo Atenco                          | 0.89 | 0.60 | 0.28 | 0.59 | 0.24 | 1 | 3 d | LL | 4dLL |
| México | San Simón de<br>Guerrero                  | 0.52 | 0.57 | 0.29 | 0.46 | 0.46 | 2 | 2 b | LL | 4bLL |
| México | Santo Tomás<br>Soyaniquilpan de<br>Juárez | 0.59 | 0.58 | 0.35 | 0.51 | 0.38 | 2 | 2 b | NS | 4bNS |
| México | Sultepec                                  | 0.72 | 0.60 | 0.48 | 0.60 | 0.21 | 1 | 3 d | NS | 4dNS |
| México | Tecámac                                   | 0.51 | 0.50 | 0.25 | 0.42 | 0.52 | 2 | 2 b | NS | 4bNS |
| México | Tejupilco                                 | 0.88 | 0.66 | 0.52 | 0.69 | 0.08 | 1 | 5 d | HL | 6dHL |
| México |                                           | 0.57 | 0.53 | 0.30 | 0.47 | 0.44 | 2 | 2 b | NS | 4bNS |

|           |                   |      |      |      |      |      |   |     |    |      |
|-----------|-------------------|------|------|------|------|------|---|-----|----|------|
|           | Valle de Chalco   |      |      |      |      |      |   |     |    |      |
| México    | Solidaridad       | 0.85 | 0.57 | 0.40 | 0.61 | 0.20 | 1 | 5 d | HL | 6dHL |
| México    | Luvianos          | 0.50 | 0.49 | 0.22 | 0.40 | 0.55 | 3 | 2 v | NS | 5vNS |
|           | San José del      |      |      |      |      |      |   |     |    |      |
| México    | Rincón            | 0.59 | 0.50 | 0.18 | 0.42 | 0.51 | 2 | 3 d | NS | 5dNS |
| México    | Temamatla         | 0.69 | 0.65 | 0.47 | 0.60 | 0.21 | 1 | 4 d | HL | 5dHL |
| México    | Temascalapa       | 0.74 | 0.58 | 0.33 | 0.55 | 0.31 | 1 | 4 d | HL | 5dHL |
| México    | Temascalcingo     | 0.64 | 0.52 | 0.42 | 0.53 | 0.34 | 1 | 3 d | NS | 4dNS |
| México    | Temascaltepec     | 0.59 | 0.53 | 0.37 | 0.50 | 0.39 | 2 | 2 b | LL | 4bLL |
| México    | Temoaya           | 0.67 | 0.54 | 0.38 | 0.53 | 0.34 | 1 | 4 d | HL | 5dHL |
| México    | Tenancingo        | 0.70 | 0.58 | 0.46 | 0.58 | 0.26 | 1 | 2 d | LL | 3dLL |
| México    | Tenango del Aire  | 0.74 | 0.61 | 0.41 | 0.59 | 0.24 | 1 | 3 d | LL | 4dLL |
| México    | Tenango del Valle | 0.82 | 0.57 | 0.46 | 0.62 | 0.19 | 1 | 2 d | LL | 3dLL |
| México    | Texcalyacac       | 0.80 | 0.58 | 0.45 | 0.61 | 0.20 | 1 | 3 d | LL | 4dLL |
| México    | Texcoco           | 0.87 | 0.63 | 0.40 | 0.63 | 0.17 | 1 | 3 d | LL | 4dLL |
| México    | Tezoyuca          | 0.76 | 0.58 | 0.26 | 0.54 | 0.33 | 1 | 5 d | HL | 6dHL |
| México    | Tianguistenco     | 0.78 | 0.59 | 0.43 | 0.60 | 0.22 | 1 | 3 d | LL | 4dLL |
| México    | Tonanitla         | 0.78 | 0.62 | 0.57 | 0.66 | 0.13 | 1 | 5 d | HL | 6dHL |
| Michoacán | Acuitzio          | 0.61 | 0.14 | 0.44 | 0.40 | 0.56 | 3 | 5 d | NS | 8dNS |
| Michoacán | Aguililla         | 0.51 | 0.17 | 0.40 | 0.36 | 0.62 | 3 | 3 b | NS | 6bNS |
| Michoacán | Álvaro Obregón    | 0.51 | 0.15 | 0.66 | 0.44 | 0.49 | 2 | 3 d | NS | 5dNS |
| Michoacán | Angamacutiro      | 0.53 | 0.16 | 0.54 | 0.41 | 0.53 | 2 | 4 d | NS | 6dNS |
| Michoacán | Angangueo         | 0.53 | 0.17 | 0.27 | 0.32 | 0.68 | 3 | 3 b | NS | 6bNS |
| Michoacán | Apatzingán        | 0.69 | 0.22 | 0.47 | 0.46 | 0.45 | 2 | 3 d | NS | 5dNS |
| Michoacán | Aporo             | 0.48 | 0.17 | 0.32 | 0.32 | 0.68 | 3 | 4 d | NS | 7dNS |
| Michoacán | Aquila            | 0.36 | 0.16 | 0.23 | 0.25 | 0.80 | 4 | 3 v | NS | 7vNS |
| Michoacán | Ario              | 0.54 | 0.20 | 0.37 | 0.37 | 0.60 | 3 | 5 d | NS | 8dNS |
| Michoacán | Arteaga           | 0.51 | 0.17 | 0.30 | 0.32 | 0.68 | 3 | 2 v | NS | 5vNS |
| Michoacán | Briseñas          | 0.68 | 0.19 | 0.76 | 0.54 | 0.32 | 1 | 5 d | HL | 6dHL |
| Michoacán | Buenavista        | 0.55 | 0.20 | 0.52 | 0.42 | 0.52 | 2 | 3 d | NS | 5dNS |
| Michoacán | Carácuaro         | 0.44 | 0.11 | 0.21 | 0.25 | 0.80 | 4 | 5 d | HH | 9dHH |
| Michoacán | Coahuayana        | 0.55 | 0.20 | 0.55 | 0.43 | 0.50 | 2 | 3 d | NS | 5dNS |
|           | Coalcomán de      |      |      |      |      |      |   |     |    |      |
| Michoacán | Vázquez Pallares  | 0.57 | 0.18 | 0.37 | 0.37 | 0.60 | 3 | 3 b | NS | 6bNS |

|           |                    |      |      |      |      |      |   |     |    |      |
|-----------|--------------------|------|------|------|------|------|---|-----|----|------|
| Michoacán | Coeneo             | 0.47 | 0.16 | 0.47 | 0.36 | 0.61 | 3 | 4 d | NS | 7dNS |
| Michoacán | Contepéc           | 0.40 | 0.16 | 0.43 | 0.33 | 0.67 | 3 | 4 d | NS | 7dNS |
| Michoacán | Copándaro          | 0.48 | 0.15 | 0.40 | 0.35 | 0.65 | 3 | 4 d | NS | 7dNS |
| Michoacán | Cotija             | 0.58 | 0.19 | 0.41 | 0.39 | 0.57 | 3 | 4 d | NS | 7dNS |
| Michoacán | Cuitzeo            | 0.58 | 0.14 | 0.47 | 0.40 | 0.56 | 3 | 4 d | NS | 7dNS |
| Michoacán | Charapan           | 0.50 | 0.11 | 0.36 | 0.32 | 0.68 | 3 | 3 b | NS | 6bNS |
| Michoacán | Charo              | 0.52 | 0.23 | 0.38 | 0.38 | 0.59 | 3 | 4 d | NS | 7dNS |
| Michoacán | Epitacio Huerta    | 0.40 | 0.15 | 0.52 | 0.36 | 0.63 | 3 | 4 d | NS | 7dNS |
| Michoacán | Erongarícuaro      | 0.45 | 0.16 | 0.39 | 0.33 | 0.66 | 3 | 5 d | NS | 8dNS |
| Michoacán | Gabriel Zamora     | 0.55 | 0.18 | 0.44 | 0.39 | 0.57 | 3 | 3 b | NS | 6bNS |
| Michoacán | Hidalgo            | 0.60 | 0.16 | 0.41 | 0.39 | 0.56 | 3 | 4 d | NS | 7dNS |
| Michoacán | La Huacana         | 0.50 | 0.14 | 0.37 | 0.33 | 0.66 | 3 | 3 b | LH | 6bLH |
| Michoacán | Huandacareo        | 0.58 | 0.19 | 0.47 | 0.41 | 0.53 | 2 | 4 d | NS | 6dNS |
| Michoacán | Huaniqueo          | 0.42 | 0.13 | 0.38 | 0.31 | 0.70 | 3 | 3 b | NS | 6bNS |
| Michoacán | Huetamo            | 0.54 | 0.18 | 0.34 | 0.35 | 0.63 | 3 | 5 d | HH | 8dHH |
| Michoacán | Huiramba           | 0.52 | 0.14 | 0.41 | 0.36 | 0.62 | 3 | 5 d | NS | 8dNS |
| Michoacán | Indaparapeo        | 0.59 | 0.16 | 0.42 | 0.39 | 0.57 | 3 | 4 d | NS | 7dNS |
| Michoacán | Irimbo             | 0.58 | 0.16 | 0.47 | 0.40 | 0.55 | 3 | 4 d | NS | 7dNS |
| Michoacán | Ixtlán             | 0.56 | 0.20 | 0.42 | 0.40 | 0.56 | 3 | 4 d | NS | 7dNS |
| Michoacán | Jacona             | 0.67 | 0.21 | 0.41 | 0.43 | 0.51 | 2 | 4 d | NS | 6dNS |
| Michoacán | Jiménez            | 0.50 | 0.19 | 0.48 | 0.39 | 0.57 | 3 | 5 d | NS | 8dNS |
| Michoacán | Jiquilpan          | 0.68 | 0.23 | 0.50 | 0.47 | 0.43 | 2 | 5 d | NS | 7dNS |
| Michoacán | Juárez             | 0.40 | 0.16 | 0.37 | 0.31 | 0.70 | 3 | 3 b | NS | 6bNS |
| Michoacán | Jungapeo           | 0.48 | 0.17 | 0.39 | 0.35 | 0.64 | 3 | 3 b | LH | 6bLH |
| Michoacán | Lagunillas         | 0.41 | 0.19 | 0.52 | 0.37 | 0.60 | 3 | 5 d | NS | 8dNS |
| Michoacán | Madero             | 0.48 | 0.12 | 0.40 | 0.33 | 0.67 | 3 | 4 d | NS | 7dNS |
| Michoacán | Maravatío          | 0.63 | 0.15 | 0.52 | 0.43 | 0.50 | 2 | 4 d | NS | 6dNS |
| Michoacán | Marcos Castellanos | 0.74 | 0.22 | 0.56 | 0.51 | 0.38 | 2 | 5 d | HL | 7dHL |
| Michoacán | Lázaro Cárdenas    | 0.77 | 0.28 | 0.49 | 0.52 | 0.36 | 2 | 3 d | LH | 5dLH |
| Michoacán | Morelia            | 0.71 | 0.27 | 0.48 | 0.49 | 0.41 | 2 | 5 d | NS | 7dNS |
| Michoacán | Nahuatzen          | 0.62 | 0.09 | 0.32 | 0.35 | 0.64 | 3 | 4 d | NS | 7dNS |
| Michoacán | Nocupétaro         | 0.39 | 0.11 | 0.29 | 0.26 | 0.78 | 4 | 5 d | HH | 9dHH |

|           |                       |      |      |      |      |      |   |     |    |      |
|-----------|-----------------------|------|------|------|------|------|---|-----|----|------|
| Michoacán | Nuevo Parangaricutiro | 0.66 | 0.19 | 0.51 | 0.45 | 0.46 | 2 | 3 d | NS | 5dNS |
| Michoacán | Nuevo Urecho          | 0.39 | 0.19 | 0.40 | 0.33 | 0.68 | 3 | 4 d | NS | 7dNS |
| Michoacán | Numarán               | 0.54 | 0.17 | 0.51 | 0.41 | 0.54 | 3 | 4 d | NS | 7dNS |
| Michoacán | Ocampo                | 0.54 | 0.12 | 0.25 | 0.31 | 0.71 | 4 | 3 v | NS | 7vNS |
| Michoacán | Pajacuarán            | 0.53 | 0.16 | 0.43 | 0.37 | 0.60 | 3 | 4 d | NS | 7dNS |
| Michoacán | Panindícuaro          | 0.48 | 0.14 | 0.46 | 0.36 | 0.62 | 3 | 4 d | NS | 7dNS |
| Michoacán | Parácuaro             | 0.53 | 0.15 | 0.45 | 0.37 | 0.60 | 3 | 3 b | NS | 6bNS |
| Michoacán | Paracho               | 0.61 | 0.17 | 0.54 | 0.44 | 0.49 | 2 | 4 d | NS | 6dNS |
| Michoacán | Pátzcuaro             | 0.68 | 0.18 | 0.41 | 0.42 | 0.51 | 2 | 5 d | NS | 7dNS |
| Michoacán | Penjamillo            | 0.50 | 0.15 | 0.36 | 0.33 | 0.66 | 3 | 4 d | NS | 7dNS |
| Michoacán | Peribán               | 0.64 | 0.22 | 0.43 | 0.43 | 0.51 | 2 | 3 d | NS | 5dNS |
| Michoacán | La Piedad             | 0.69 | 0.25 | 0.46 | 0.46 | 0.45 | 2 | 4 d | NS | 6dNS |
| Michoacán | Purépero              | 0.73 | 0.20 | 0.67 | 0.53 | 0.33 | 1 | 5 d | NS | 6dNS |
| Michoacán | Puruándiro            | 0.60 | 0.17 | 0.37 | 0.38 | 0.59 | 3 | 3 b | NS | 6bNS |
| Michoacán | Queréndaro            | 0.55 | 0.15 | 0.68 | 0.46 | 0.45 | 2 | 3 d | NS | 5dNS |
| Michoacán | Quiroga               | 0.60 | 0.15 | 0.48 | 0.41 | 0.53 | 2 | 5 d | NS | 7dNS |
| Michoacán | Cojumatlán de Régules | 0.55 | 0.15 | 0.55 | 0.42 | 0.52 | 2 | 5 d | HL | 7dHL |
| Michoacán | Los Reyes             | 0.61 | 0.22 | 0.36 | 0.39 | 0.56 | 3 | 3 b | NS | 6bNS |
| Michoacán | Sahuayo               | 0.70 | 0.22 | 0.45 | 0.46 | 0.46 | 2 | 5 d | NS | 7dNS |
| Michoacán | San Lucas             | 0.46 | 0.15 | 0.32 | 0.31 | 0.70 | 3 | 4 d | HH | 7dHH |
| Michoacán | Santa Ana Maya        | 0.57 | 0.14 | 0.49 | 0.40 | 0.56 | 3 | 4 d | HL | 7dHL |
| Michoacán | Salvador Escalante    | 0.61 | 0.15 | 0.46 | 0.40 | 0.55 | 3 | 5 d | NS | 8dNS |
| Michoacán | Senguio               | 0.45 | 0.15 | 0.36 | 0.32 | 0.69 | 3 | 4 d | NS | 7dNS |
| Michoacán | Susupuato             | 0.30 | 0.10 | 0.38 | 0.26 | 0.78 | 4 | 2 v | NS | 6vNS |
| Michoacán | Tacámbaro             | 0.56 | 0.20 | 0.46 | 0.41 | 0.54 | 3 | 5 d | NS | 8dNS |
| Michoacán | Tancítaro             | 0.50 | 0.20 | 0.40 | 0.37 | 0.61 | 3 | 3 b | NS | 6bNS |
| Michoacán | Tangamandapio         | 0.58 | 0.15 | 0.46 | 0.40 | 0.56 | 3 | 4 d | NS | 7dNS |
| Michoacán | Tangancícuaro         | 0.55 | 0.20 | 0.42 | 0.39 | 0.57 | 3 | 4 d | NS | 7dNS |
| Michoacán | Tanhuato              | 0.57 | 0.19 | 0.51 | 0.42 | 0.52 | 2 | 4 d | NS | 6dNS |
| Michoacán | Chavinda              | 0.55 | 0.18 | 0.45 | 0.39 | 0.57 | 3 | 4 d | NS | 7dNS |
| Michoacán | Cherán                | 0.77 | 0.12 | 0.58 | 0.49 | 0.40 | 2 | 4 d | NS | 6dNS |



|           |                             |      |      |      |      |      |   |     |    |      |
|-----------|-----------------------------|------|------|------|------|------|---|-----|----|------|
| Michoacán | Chilchota                   | 0.55 | 0.14 | 0.41 | 0.37 | 0.60 | 3 | 4 d | NS | 7dNS |
| Michoacán | Chinicuila                  | 0.44 | 0.14 | 0.39 | 0.32 | 0.68 | 3 | 3 b | NS | 6bNS |
| Michoacán | Chucándiro                  | 0.39 | 0.16 | 0.33 | 0.29 | 0.73 | 4 | 3 v | NS | 7vNS |
| Michoacán | Churintzio                  | 0.49 | 0.18 | 0.44 | 0.37 | 0.60 | 3 | 4 d | NS | 7dNS |
| Michoacán | Churumuco                   | 0.42 | 0.14 | 0.26 | 0.27 | 0.77 | 4 | 5 d | HH | 9dHH |
| Michoacán | Ecuandureo                  | 0.56 | 0.19 | 0.46 | 0.40 | 0.55 | 3 | 4 d | NS | 7dNS |
| Michoacán | Morelos                     | 0.42 | 0.16 | 0.49 | 0.35 | 0.63 | 3 | 3 b | NS | 6bNS |
| Michoacán | Música                      | 0.56 | 0.18 | 0.51 | 0.42 | 0.52 | 2 | 3 d | NS | 5dNS |
| Michoacán | Taretan                     | 0.61 | 0.24 | 0.49 | 0.45 | 0.48 | 2 | 5 d | NS | 7dNS |
| Michoacán | Tarímbaro                   | 0.53 | 0.29 | 0.54 | 0.45 | 0.47 | 2 | 4 d | NS | 6dNS |
| Michoacán | Tepalcatepec                | 0.53 | 0.21 | 0.45 | 0.40 | 0.56 | 3 | 4 d | NS | 7dNS |
| Michoacán | Tingambato                  | 0.72 | 0.15 | 0.42 | 0.43 | 0.50 | 2 | 5 d | NS | 7dNS |
| Michoacán | Tingüindín                  | 0.60 | 0.21 | 0.41 | 0.41 | 0.54 | 3 | 4 d | NS | 7dNS |
| Michoacán | Tiquicheo de Nicolás Romero | 0.38 | 0.13 | 0.22 | 0.24 | 0.82 | 4 | 4 b | HH | 8bHH |
| Michoacán | Tlalpujahua                 | 0.49 | 0.19 | 0.33 | 0.34 | 0.66 | 3 | 4 d | NS | 7dNS |
| Michoacán | Tlazazalca                  | 0.52 | 0.15 | 0.49 | 0.38 | 0.58 | 3 | 4 d | NS | 7dNS |
| Michoacán | Tocumbo                     | 0.63 | 0.24 | 0.42 | 0.43 | 0.50 | 2 | 3 d | NS | 5dNS |
| Michoacán | Tumbiscatío                 | 0.40 | 0.13 | 0.35 | 0.29 | 0.73 | 4 | 2 v | NS | 6vNS |
| Michoacán | Turicato                    | 0.44 | 0.15 | 0.31 | 0.30 | 0.72 | 4 | 5 d | HH | 9dHH |
| Michoacán | Tuxpan                      | 0.59 | 0.18 | 0.41 | 0.39 | 0.56 | 3 | 3 b | LH | 6bLH |
| Michoacán | Tuzantla                    | 0.39 | 0.11 | 0.19 | 0.23 | 0.84 | 4 | 3 v | NS | 7vNS |
| Michoacán | Tzintzuntzan                | 0.56 | 0.16 | 0.40 | 0.37 | 0.60 | 3 | 5 d | NS | 8dNS |
| Michoacán | Tzitzio                     | 0.35 | 0.11 | 0.23 | 0.23 | 0.84 | 4 | 3 v | NS | 7vNS |
| Michoacán | Uruapan                     | 0.73 | 0.22 | 0.41 | 0.45 | 0.46 | 2 | 4 d | NS | 6dNS |
| Michoacán | Venustiano Carranza         | 0.57 | 0.18 | 0.74 | 0.49 | 0.40 | 2 | 5 d | NS | 7dNS |
| Michoacán | Villamar                    | 0.51 | 0.21 | 0.56 | 0.42 | 0.51 | 2 | 5 d | NS | 7dNS |
| Michoacán | Vista Hermosa               | 0.57 | 0.21 | 0.70 | 0.49 | 0.40 | 2 | 5 d | HL | 7dHL |
| Michoacán | Yurécuaro                   | 0.66 | 0.19 | 0.57 | 0.47 | 0.43 | 2 | 4 d | NS | 6dNS |
| Michoacán | Zacapu                      | 0.71 | 0.23 | 0.48 | 0.47 | 0.43 | 2 | 5 d | NS | 7dNS |
| Michoacán | Zamora                      | 0.67 | 0.23 | 0.57 | 0.49 | 0.40 | 2 | 4 d | NS | 6dNS |
| Michoacán | Zináparo                    | 0.39 | 0.23 | 0.53 | 0.38 | 0.58 | 3 | 4 d | NS | 7dNS |

|           |                   |      |      |      |      |      |   |     |    |      |
|-----------|-------------------|------|------|------|------|------|---|-----|----|------|
| Michoacán | Zinapécuaro       | 0.57 | 0.17 | 0.46 | 0.40 | 0.55 | 3 | 4 d | NS | 7dNS |
| Michoacán | Ziracuaretiro     | 0.58 | 0.19 | 0.45 | 0.40 | 0.55 | 3 | 5 d | NS | 8dNS |
| Michoacán | Zitácuaro         | 0.58 | 0.19 | 0.38 | 0.38 | 0.58 | 3 | 2 v | NS | 5vNS |
| Michoacán | José Sixto        |      |      |      |      |      |   |     |    |      |
|           | Verduzco          | 0.52 | 0.17 | 0.66 | 0.45 | 0.47 | 2 | 3 d | NS | 5dNS |
| Morelos   | Amacuzac          | 0.60 | 0.35 | 0.43 | 0.46 | 0.45 | 2 | 2 b | NS | 4bNS |
| Morelos   | Atlatlahucan      | 0.69 | 0.38 | 0.39 | 0.49 | 0.41 | 2 | 2 b | LL | 4bLL |
| Morelos   | Axochiapan        | 0.69 | 0.30 | 0.53 | 0.51 | 0.37 | 2 | 2 b | NS | 4bNS |
| Morelos   | Ayala             | 0.68 | 0.37 | 0.48 | 0.51 | 0.37 | 2 | 2 b | LL | 4bLL |
| Morelos   | Coatlán del Río   | 0.53 | 0.35 | 0.41 | 0.43 | 0.51 | 2 | 2 b | NS | 4bNS |
| Morelos   | Cuautla           | 0.77 | 0.41 | 0.54 | 0.57 | 0.27 | 1 | 4 d | NS | 5dNS |
| Morelos   | Cuernavaca        | 0.87 | 0.46 | 0.38 | 0.57 | 0.27 | 1 | 2 d | LL | 3dLL |
| Morelos   | Emiliano Zapata   | 0.76 | 0.41 | 0.51 | 0.56 | 0.28 | 1 | 2 d | LL | 3dLL |
| Morelos   | Huitzilac         | 0.67 | 0.40 | 0.27 | 0.44 | 0.48 | 2 | 2 b | LL | 4bLL |
| Morelos   | Jantetelco        | 0.67 | 0.35 | 0.41 | 0.48 | 0.42 | 2 | 2 b | NS | 4bNS |
| Morelos   | Jiutepec          | 0.84 | 0.44 | 0.50 | 0.59 | 0.23 | 1 | 2 d | LL | 3dLL |
| Morelos   | Jojutla           | 0.76 | 0.41 | 0.51 | 0.56 | 0.29 | 1 | 2 d | LL | 3dLL |
|           | Jonacatepec de    |      |      |      |      |      |   |     |    |      |
| Morelos   | Leandro Valle     | 0.78 | 0.35 | 0.38 | 0.50 | 0.38 | 2 | 2 b | NS | 4bNS |
| Morelos   | Mazatepec         | 0.62 | 0.40 | 0.48 | 0.50 | 0.39 | 2 | 2 b | NS | 4bNS |
| Morelos   | Miacatlán         | 0.67 | 0.34 | 0.40 | 0.47 | 0.44 | 2 | 2 b | LL | 4bLL |
| Morelos   | Ocuituco          | 0.70 | 0.30 | 0.40 | 0.47 | 0.44 | 2 | 2 b | NS | 4bNS |
| Morelos   | Puente de Ixtla   | 0.76 | 0.33 | 0.41 | 0.50 | 0.39 | 2 | 2 b | NS | 4bNS |
| Morelos   | Temixco           | 0.83 | 0.36 | 0.42 | 0.54 | 0.32 | 1 | 2 d | LL | 3dLL |
| Morelos   | Tepalcingo        | 0.68 | 0.32 | 0.38 | 0.46 | 0.46 | 2 | 2 b | NS | 4bNS |
| Morelos   | Tepoztlán         | 0.69 | 0.41 | 0.26 | 0.45 | 0.47 | 2 | 2 b | LL | 4bLL |
| Morelos   | Tetecala          | 0.68 | 0.38 | 0.45 | 0.50 | 0.38 | 2 | 2 b | NS | 4bNS |
| Morelos   | Tetela del Volcán | 0.78 | 0.28 | 0.38 | 0.48 | 0.42 | 2 | 2 b | NS | 4bNS |
| Morelos   | Tlalnepantla      | 0.61 | 0.32 | 0.18 | 0.37 | 0.60 | 3 | 2 v | LL | 5vLL |
|           | Tlaltizapán de    |      |      |      |      |      |   |     |    |      |
| Morelos   | Zapata            | 0.72 | 0.38 | 0.51 | 0.53 | 0.33 | 1 | 2 d | LL | 3dLL |
| Morelos   | Tlaquitenango     | 0.66 | 0.38 | 0.38 | 0.47 | 0.43 | 2 | 2 b | LL | 4bLL |
| Morelos   | Tlayacapan        | 0.64 | 0.40 | 0.37 | 0.47 | 0.44 | 2 | 2 b | NS | 4bNS |
| Morelos   | Totolapan         | 0.70 | 0.34 | 0.29 | 0.44 | 0.48 | 2 | 2 b | LL | 4bLL |

|            |                    |      |      |      |      |      |   |     |    |      |
|------------|--------------------|------|------|------|------|------|---|-----|----|------|
| Morelos    | Xochitepec         | 0.75 | 0.38 | 0.49 | 0.54 | 0.32 | 1 | 2 d | LL | 3dLL |
| Morelos    | Yautepec           | 0.74 | 0.38 | 0.49 | 0.53 | 0.33 | 1 | 2 d | LL | 3dLL |
| Morelos    | Yecapixtla         | 0.73 | 0.34 | 0.40 | 0.49 | 0.41 | 2 | 2 b | NS | 4bNS |
| Morelos    | Zacatepec          | 0.73 | 0.42 | 0.59 | 0.58 | 0.25 | 1 | 2 d | LL | 3dLL |
|            | Zacualpan de       |      |      |      |      |      |   |     |    |      |
| Morelos    | Amilpas            | 0.76 | 0.33 | 0.27 | 0.45 | 0.46 | 2 | 2 b | NS | 4bNS |
| Morelos    | Temoac             | 0.70 | 0.28 | 0.37 | 0.45 | 0.47 | 2 | 2 b | NS | 4bNS |
| Morelos    | Coatetelco         | 0.63 | 0.38 | 0.43 | 0.48 | 0.42 | 2 | 3 d | LL | 5dLL |
| Morelos    | Xoxocotla          | 0.75 | 0.32 | 0.43 | 0.50 | 0.39 | 2 | 2 b | LL | 4bLL |
| Morelos    | Hueyapan           | 0.78 | 0.27 | 0.37 | 0.47 | 0.43 | 2 | 2 b | NS | 4bNS |
| Nayarit    | Acaponeta          | 0.63 | 0.27 | 0.42 | 0.44 | 0.49 | 2 | 3 d | NS | 5dNS |
| Nayarit    | Ahuacatlán         | 0.61 | 0.30 | 0.48 | 0.46 | 0.45 | 2 | 3 d | NS | 5dNS |
| Nayarit    | Amatlán de Cañas   | 0.56 | 0.29 | 0.47 | 0.44 | 0.49 | 2 | 3 d | NS | 5dNS |
| Nayarit    | Compostela         | 0.71 | 0.29 | 0.46 | 0.49 | 0.41 | 2 | 3 d | LL | 5dLL |
| Nayarit    | Huajicori          | 0.52 | 0.14 | 0.31 | 0.32 | 0.68 | 3 | 3 b | NS | 6bNS |
| Nayarit    | Ixtlán del Río     | 0.72 | 0.26 | 0.45 | 0.47 | 0.43 | 2 | 5 d | HL | 7dHL |
| Nayarit    | Jala               | 0.66 | 0.19 | 0.41 | 0.42 | 0.52 | 2 | 5 d | HL | 7dHL |
| Nayarit    | Xalisco            | 0.70 | 0.34 | 0.45 | 0.49 | 0.40 | 2 | 3 d | NS | 5dNS |
| Nayarit    | Del Nayar          | 0.33 | 0.11 | 0.25 | 0.23 | 0.84 | 4 | 3 v | NS | 7vNS |
| Nayarit    | Rosamorada         | 0.56 | 0.23 | 0.45 | 0.41 | 0.54 | 2 | 4 d | NS | 6dNS |
| Nayarit    | Ruíz               | 0.66 | 0.22 | 0.41 | 0.43 | 0.50 | 2 | 4 d | NS | 6dNS |
| Nayarit    | San Blas           | 0.63 | 0.27 | 0.39 | 0.43 | 0.51 | 2 | 4 d | HL | 6dHL |
|            | San Pedro          |      |      |      |      |      |   |     |    |      |
| Nayarit    | Lagunillas         | 0.62 | 0.28 | 0.46 | 0.45 | 0.47 | 2 | 3 d | NS | 5dNS |
|            | Santa María del    |      |      |      |      |      |   |     |    |      |
| Nayarit    | Oro                | 0.56 | 0.29 | 0.43 | 0.43 | 0.50 | 2 | 3 d | NS | 5dNS |
| Nayarit    | Santiago Ixcuintla | 0.63 | 0.28 | 0.46 | 0.45 | 0.46 | 2 | 4 d | HL | 6dHL |
| Nayarit    | Tecuala            | 0.64 | 0.25 | 0.43 | 0.44 | 0.49 | 2 | 4 d | NS | 6dNS |
| Nayarit    | Tepic              | 0.76 | 0.36 | 0.46 | 0.53 | 0.34 | 1 | 3 d | NS | 4dNS |
| Nayarit    | Tuxpan             | 0.75 | 0.25 | 0.56 | 0.52 | 0.35 | 2 | 4 d | NS | 6dNS |
| Nayarit    | La Yesca           | 0.42 | 0.17 | 0.32 | 0.30 | 0.71 | 4 | 4 b | NS | 8bNS |
| Nayarit    | Bahía de Banderas  | 0.74 | 0.36 | 0.48 | 0.53 | 0.34 | 1 | 3 d | LL | 4dLL |
| Nuevo León | Abasolo            | 0.63 | 0.68 | 0.42 | 0.58 | 0.26 | 1 | 3 d | LL | 4dLL |
| Nuevo León | Agualeguas         | 0.55 | 0.71 | 0.38 | 0.54 | 0.31 | 1 | 4 d | HL | 5dHL |

|            |                   |      |      |      |      |      |   |     |    |      |
|------------|-------------------|------|------|------|------|------|---|-----|----|------|
| Nuevo León | Los Aldamas       | 0.51 | 0.69 | 0.39 | 0.53 | 0.34 | 1 | 4 d | HL | 5dHL |
| Nuevo León | Allende           | 0.80 | 0.69 | 0.39 | 0.63 | 0.18 | 1 | 4 d | HL | 5dHL |
| Nuevo León | Anáhuac           | 0.75 | 0.62 | 0.42 | 0.59 | 0.23 | 1 | 3 d | LL | 4dLL |
| Nuevo León | Apodaca           | 0.88 | 0.72 | 0.53 | 0.71 | 0.04 | 1 | 3 d | LL | 4dLL |
| Nuevo León | General Bravo     | 0.72 | 0.65 | 0.38 | 0.58 | 0.25 | 1 | 4 d | HL | 5dHL |
| Nuevo León | General Escobedo  | 0.89 | 0.68 | 0.41 | 0.66 | 0.12 | 1 | 3 d | LL | 4dLL |
| Nuevo León | General Terán     | 0.70 | 0.65 | 0.39 | 0.58 | 0.25 | 1 | 4 d | HL | 5dHL |
| Nuevo León | General Treviño   | 0.50 | 0.69 | 0.40 | 0.53 | 0.34 | 1 | 4 d | HL | 5dHL |
| Nuevo León | General Zaragoza  | 0.56 | 0.54 | 0.27 | 0.46 | 0.46 | 2 | 3 d | NS | 5dNS |
| Nuevo León | General Zuazua    | 0.78 | 0.70 | 0.41 | 0.63 | 0.17 | 1 | 4 d | HL | 5dHL |
| Nuevo León | Guadalupe         | 0.91 | 0.71 | 0.41 | 0.68 | 0.09 | 1 | 3 d | LL | 4dLL |
| Nuevo León | Los Herreras      | 0.55 | 0.69 | 0.38 | 0.54 | 0.32 | 1 | 4 d | HL | 5dHL |
| Nuevo León | Higueras          | 0.53 | 0.69 | 0.39 | 0.54 | 0.33 | 1 | 4 d | HL | 5dHL |
| Nuevo León | Aramberri         | 0.59 | 0.52 | 0.31 | 0.47 | 0.44 | 2 | 3 d | NS | 5dNS |
| Nuevo León | Bustamante        | 0.78 | 0.62 | 0.42 | 0.61 | 0.21 | 1 | 4 d | HL | 5dHL |
| Nuevo León | Cadereyta         |      |      |      |      |      |   |     |    |      |
| Nuevo León | Jiménez           | 0.86 | 0.69 | 0.38 | 0.64 | 0.15 | 1 | 4 d | HL | 5dHL |
| Nuevo León | El Carmen         | 0.81 | 0.67 | 0.40 | 0.63 | 0.18 | 1 | 3 d | LL | 4dLL |
| Nuevo León | Cerralvo          | 0.77 | 0.65 | 0.39 | 0.60 | 0.22 | 1 | 4 d | HL | 5dHL |
| Nuevo León | Ciénega de Flores | 0.82 | 0.70 | 0.43 | 0.65 | 0.14 | 1 | 5 d | HL | 6dHL |
| Nuevo León | China             | 0.75 | 0.67 | 0.41 | 0.61 | 0.20 | 1 | 4 d | HL | 5dHL |
| Nuevo León | Doctor Arroyo     | 0.62 | 0.52 | 0.26 | 0.47 | 0.44 | 2 | 2 b | NS | 4bNS |
| Nuevo León | Doctor Coss       | 0.50 | 0.68 | 0.34 | 0.51 | 0.37 | 2 | 4 d | HL | 6dHL |
| Nuevo León | Doctor González   | 0.57 | 0.69 | 0.38 | 0.55 | 0.31 | 1 | 4 d | HL | 5dHL |
| Nuevo León | Galeana           | 0.58 | 0.55 | 0.29 | 0.48 | 0.43 | 2 | 4 d | NS | 6dNS |
| Nuevo León | García            | 0.79 | 0.68 | 0.39 | 0.62 | 0.18 | 1 | 4 d | HL | 5dHL |
| Nuevo León | San Pedro Garza   |      |      |      |      |      |   |     |    |      |
| Nuevo León | García            | 0.92 | 0.75 | 0.40 | 0.69 | 0.07 | 1 | 3 d | LL | 4dLL |
| Nuevo León | Hualahuises       | 0.80 | 0.63 | 0.49 | 0.64 | 0.16 | 1 | 3 d | LL | 4dLL |
| Nuevo León | Iturbide          | 0.52 | 0.57 | 0.31 | 0.47 | 0.44 | 2 | 3 d | LL | 5dLL |
| Nuevo León | Juárez            | 0.79 | 0.68 | 0.38 | 0.62 | 0.19 | 1 | 3 d | LL | 4dLL |
| Nuevo León | Lampazos de       |      |      |      |      |      |   |     |    |      |
| Nuevo León | Naranjo           | 0.74 | 0.62 | 0.39 | 0.58 | 0.25 | 1 | 3 d | LL | 4dLL |
| Nuevo León | Linares           | 0.82 | 0.66 | 0.41 | 0.63 | 0.17 | 1 | 3 d | LL | 4dLL |

|            |                    |      |      |      |      |      |   |     |    |      |
|------------|--------------------|------|------|------|------|------|---|-----|----|------|
| Nuevo León | Marín              | 0.71 | 0.69 | 0.40 | 0.60 | 0.22 | 1 | 3 d | LL | 4dLL |
| Nuevo León | Melchor Ocampo     | 0.54 | 0.72 | 0.40 | 0.55 | 0.30 | 1 | 4 d | HL | 5dHL |
| Nuevo León | Mier y Noriega     | 0.43 | 0.48 | 0.27 | 0.39 | 0.57 | 3 | 4 d | NS | 7dNS |
| Nuevo León | Mina               | 0.75 | 0.62 | 0.36 | 0.58 | 0.26 | 1 | 4 d | HL | 5dHL |
| Nuevo León | Montemorelos       | 0.80 | 0.70 | 0.41 | 0.64 | 0.16 | 1 | 4 d | HL | 5dHL |
| Nuevo León | Monterrey          | 0.91 | 0.70 | 0.41 | 0.67 | 0.10 | 1 | 3 d | LL | 4dLL |
| Nuevo León | Parás              | 0.52 | 0.71 | 0.37 | 0.53 | 0.33 | 1 | 4 d | HL | 5dHL |
| Nuevo León | Pesquería          | 0.71 | 0.66 | 0.51 | 0.63 | 0.17 | 1 | 3 d | LL | 4dLL |
| Nuevo León | Los Ramones        | 0.53 | 0.65 | 0.36 | 0.51 | 0.36 | 2 | 4 d | HL | 6dHL |
| Nuevo León | Rayones            | 0.51 | 0.57 | 0.32 | 0.47 | 0.44 | 2 | 4 d | HL | 6dHL |
| Nuevo León | Sabinas Hidalgo    | 0.78 | 0.67 | 0.42 | 0.62 | 0.18 | 1 | 3 d | LL | 4dLL |
| Nuevo León | Salinas Victoria   | 0.73 | 0.63 | 0.31 | 0.56 | 0.29 | 1 | 4 d | HL | 5dHL |
| Nuevo León | San Nicolás de los |      |      |      |      |      |   |     |    |      |
| Nuevo León | Garza              | 0.87 | 0.74 | 0.42 | 0.68 | 0.09 | 1 | 3 d | LL | 4dLL |
| Nuevo León | Hidalgo            | 0.82 | 0.67 | 0.40 | 0.63 | 0.17 | 1 | 4 d | HL | 5dHL |
| Nuevo León | Santa Catarina     | 0.86 | 0.71 | 0.40 | 0.66 | 0.13 | 1 | 3 d | LL | 4dLL |
| Nuevo León | Santiago           | 0.78 | 0.72 | 0.36 | 0.62 | 0.19 | 1 | 4 d | HL | 5dHL |
| Nuevo León | Vallecillo         | 0.50 | 0.68 | 0.35 | 0.51 | 0.37 | 2 | 4 d | HL | 6dHL |
| Nuevo León | Villaldama         | 0.68 | 0.64 | 0.41 | 0.58 | 0.26 | 1 | 4 d | HL | 5dHL |
| Oaxaca     | Abejones           | 0.23 | 0.16 | 0.40 | 0.27 | 0.78 | 4 | 4 b | HH | 8bHH |
| Oaxaca     | Acatlán de Pérez   |      |      |      |      |      |   |     |    |      |
| Oaxaca     | Figueroa           | 0.47 | 0.27 | 0.43 | 0.39 | 0.57 | 3 | 5 d | NS | 8dNS |
| Oaxaca     | Santa Cruz         |      |      |      |      |      |   |     |    |      |
| Oaxaca     | Papalutla          | 0.29 | 0.25 | 0.42 | 0.32 | 0.69 | 3 | 3 b | LH | 6bLH |
| Oaxaca     | Asunción           |      |      |      |      |      |   |     |    |      |
| Oaxaca     | Cacalotepec        | 0.24 | 0.16 | 0.37 | 0.26 | 0.79 | 4 | 3 v | LH | 7vLH |
| Oaxaca     | Asunción           |      |      |      |      |      |   |     |    |      |
| Oaxaca     | Cuyotepeji         | 0.32 | 0.27 | 0.37 | 0.32 | 0.69 | 3 | 3 b | LH | 6bLH |
| Oaxaca     | Asunción           |      |      |      |      |      |   |     |    |      |
| Oaxaca     | Ixtaltepec         | 0.41 | 0.33 | 0.40 | 0.38 | 0.58 | 3 | 5 d | NS | 8dNS |
| Oaxaca     | Asunción           |      |      |      |      |      |   |     |    |      |
| Oaxaca     | Nochixtlán         | 0.53 | 0.27 | 0.65 | 0.48 | 0.41 | 2 | 2 b | LH | 4bLH |
| Oaxaca     | Asunción Ocotlán   | 0.39 | 0.18 | 0.29 | 0.29 | 0.74 | 4 | 2 v | LH | 6vLH |
| Oaxaca     | Asunción           |      |      |      |      |      |   |     |    |      |
| Oaxaca     | Tlacolulita        | 0.26 | 0.21 | 0.41 | 0.30 | 0.73 | 4 | 3 v | LH | 7vLH |

|        |                    |      |      |      |      |      |   |     |    |      |
|--------|--------------------|------|------|------|------|------|---|-----|----|------|
| Oaxaca | Ayotzintepc        | 0.49 | 0.16 | 0.45 | 0.37 | 0.61 | 3 | 4 d | HH | 7dHH |
| Oaxaca | El Barrio de la    |      |      |      |      |      |   |     |    |      |
| Oaxaca | Soledad            | 0.40 | 0.40 | 0.48 | 0.42 | 0.51 | 2 | 5 d | NS | 7dNS |
| Oaxaca | Calihualá          | 0.18 | 0.20 | 0.31 | 0.23 | 0.83 | 4 | 3 v | LH | 7vLH |
| Oaxaca | Candelaria Loxicha | 0.21 | 0.19 | 0.50 | 0.30 | 0.72 | 4 | 4 b | HH | 8bHH |
| Oaxaca | Ciudad Ixtepec     | 0.60 | 0.36 | 0.45 | 0.47 | 0.44 | 2 | 5 d | NS | 7dNS |
| Oaxaca | Coatecas Altas     | 0.28 | 0.16 | 0.16 | 0.20 | 0.89 | 4 | 3 v | LH | 7vLH |
| Oaxaca | Coicoyán de las    |      |      |      |      |      |   |     |    |      |
| Oaxaca | Flores             | 0.12 | 0.15 | 0.30 | 0.19 | 0.90 | 4 | 2 v | LH | 6vLH |
| Oaxaca | Ciénega de         |      |      |      |      |      |   |     |    |      |
| Oaxaca | Zimatlán           | 0.56 | 0.24 | 0.44 | 0.42 | 0.53 | 2 | 2 b | NS | 4bNS |
| Oaxaca | Cosolapa           | 0.51 | 0.29 | 0.45 | 0.42 | 0.53 | 2 | 5 d | NS | 7dNS |
| Oaxaca | La Compañía        | 0.24 | 0.18 | 0.31 | 0.24 | 0.82 | 4 | 2 v | LH | 6vLH |
| Oaxaca | Concepción         |      |      |      |      |      |   |     |    |      |
| Oaxaca | Buenavista         | 0.28 | 0.20 | 0.46 | 0.31 | 0.70 | 3 | 2 v | LH | 5vLH |
| Oaxaca | San Andrés         |      |      |      |      |      |   |     |    |      |
| Oaxaca | Sinaxtla           | 0.35 | 0.31 | 0.46 | 0.37 | 0.60 | 3 | 2 v | LH | 5vLH |
| Oaxaca | Concepción         |      |      |      |      |      |   |     |    |      |
| Oaxaca | Pápalo             | 0.28 | 0.16 | 0.50 | 0.31 | 0.70 | 3 | 4 d | HH | 7dHH |
| Oaxaca | Constancia del     |      |      |      |      |      |   |     |    |      |
| Oaxaca | Rosario            | 0.18 | 0.22 | 0.43 | 0.28 | 0.76 | 4 | 2 v | LH | 6vLH |
| Oaxaca | Cosoltepec         | 0.32 | 0.23 | 0.30 | 0.28 | 0.75 | 4 | 3 v | LH | 7vLH |
| Oaxaca | Cuicápam de        |      |      |      |      |      |   |     |    |      |
| Oaxaca | Guerrero           | 0.61 | 0.28 | 0.51 | 0.47 | 0.44 | 2 | 2 b | LH | 4bLH |
| Oaxaca | San Andrés         |      |      |      |      |      |   |     |    |      |
| Oaxaca | Solaga             | 0.27 | 0.20 | 0.48 | 0.32 | 0.69 | 3 | 3 b | LH | 6bLH |
| Oaxaca | San Andrés         |      |      |      |      |      |   |     |    |      |
| Oaxaca | Teotilápam         | 0.27 | 0.16 | 0.39 | 0.27 | 0.76 | 4 | 5 d | HH | 9dHH |
| Oaxaca | Cuyamecalco Villa  |      |      |      |      |      |   |     |    |      |
| Oaxaca | de Zaragoza        | 0.18 | 0.17 | 0.34 | 0.23 | 0.84 | 4 | 4 b | HH | 8bHH |
| Oaxaca | Chahuities         | 0.51 | 0.25 | 0.52 | 0.42 | 0.51 | 2 | 3 d | NS | 5dNS |
| Oaxaca | Chalcatongo de     |      |      |      |      |      |   |     |    |      |
| Oaxaca | Hidalgo            | 0.29 | 0.21 | 0.43 | 0.31 | 0.70 | 3 | 2 v | LH | 5vLH |
| Oaxaca | Chiquihuitlán de   |      |      |      |      |      |   |     |    |      |
| Oaxaca | Benito Juárez      | 0.19 | 0.18 | 0.33 | 0.23 | 0.83 | 4 | 4 b | HH | 8bHH |
| Oaxaca | Heroica Ciudad de  |      |      |      |      |      |   |     |    |      |
| Oaxaca | Ejutla de Crespo   | 0.40 | 0.24 | 0.32 | 0.32 | 0.69 | 3 | 2 v | LH | 5vLH |

|        |                    |      |      |      |      |      |   |     |    |      |
|--------|--------------------|------|------|------|------|------|---|-----|----|------|
| Oaxaca | El Espinal         | 0.53 | 0.38 | 0.64 | 0.52 | 0.36 | 2 | 5 d | NS | 7dNS |
| Oaxaca | Tamazulápam del    |      |      |      |      |      |   |     |    |      |
| Oaxaca | Espíritu Santo     | 0.24 | 0.20 | 0.35 | 0.26 | 0.78 | 4 | 3 v | LH | 7vLH |
| Oaxaca | San Andrés         |      |      |      |      |      |   |     |    |      |
| Oaxaca | Tepetlapa          | 0.18 | 0.16 | 0.28 | 0.21 | 0.88 | 4 | 3 v | LH | 7vLH |
| Oaxaca | Eloxochitlán de    |      |      |      |      |      |   |     |    |      |
| Oaxaca | Flores Magón       | 0.13 | 0.17 | 0.19 | 0.16 | 0.95 | 4 | 4 b | HH | 8bHH |
| Oaxaca | Fresnillo de       |      |      |      |      |      |   |     |    |      |
| Oaxaca | Trujano            | 0.18 | 0.22 | 0.24 | 0.21 | 0.87 | 4 | 3 v | LH | 7vLH |
| Oaxaca | Magdalena          |      |      |      |      |      |   |     |    |      |
| Oaxaca | Ocotlán            | 0.32 | 0.24 | 0.35 | 0.30 | 0.71 | 4 | 2 v | LH | 6vLH |
| Oaxaca | Guadalupe Etla     | 0.35 | 0.39 | 0.46 | 0.40 | 0.56 | 3 | 3 b | NS | 6bNS |
| Oaxaca | Magdalena          |      |      |      |      |      |   |     |    |      |
| Oaxaca | Peñasco            | 0.21 | 0.16 | 0.33 | 0.23 | 0.83 | 4 | 2 v | LH | 6vLH |
| Oaxaca | Guadalupe de       |      |      |      |      |      |   |     |    |      |
| Oaxaca | Ramírez            | 0.25 | 0.23 | 0.25 | 0.25 | 0.81 | 4 | 3 v | LH | 7vLH |
| Oaxaca | Guelatao de        |      |      |      |      |      |   |     |    |      |
| Oaxaca | Juárez             | 0.42 | 0.39 | 0.40 | 0.40 | 0.55 | 3 | 3 b | NS | 6bNS |
| Oaxaca | Guevea de          |      |      |      |      |      |   |     |    |      |
| Oaxaca | Humboldt           | 0.24 | 0.18 | 0.46 | 0.29 | 0.73 | 4 | 3 v | LH | 7vLH |
| Oaxaca | Magdalena          |      |      |      |      |      |   |     |    |      |
| Oaxaca | Teitipac           | 0.39 | 0.16 | 0.25 | 0.27 | 0.77 | 4 | 3 v | LH | 7vLH |
| Oaxaca | Magdalena          |      |      |      |      |      |   |     |    |      |
| Oaxaca | Tequisistlán       | 0.44 | 0.27 | 0.51 | 0.41 | 0.54 | 3 | 3 b | LH | 6bLH |
| Oaxaca | Mesones Hidalgo    | 0.22 | 0.18 | 0.41 | 0.27 | 0.77 | 4 | 2 v | LH | 6vLH |
| Oaxaca | San Antonio Acutla | 0.25 | 0.21 | 0.39 | 0.28 | 0.75 | 4 | 3 v | LH | 7vLH |
| Oaxaca | Villa Hidalgo      | 0.23 | 0.20 | 0.43 | 0.29 | 0.74 | 4 | 3 v | LH | 7vLH |
| Oaxaca | Heroica Ciudad de  |      |      |      |      |      |   |     |    |      |
| Oaxaca | Huajuapán de       |      |      |      |      |      |   |     |    |      |
| Oaxaca | León               | 0.62 | 0.35 | 0.30 | 0.43 | 0.51 | 2 | 4 d | HH | 6dHH |
| Oaxaca | Huautepec          | 0.08 | 0.15 | 0.22 | 0.15 | 0.97 | 4 | 4 b | HH | 8bHH |
| Oaxaca | Huautla de         |      |      |      |      |      |   |     |    |      |
| Oaxaca | Jiménez            | 0.40 | 0.23 | 0.24 | 0.29 | 0.74 | 4 | 4 b | HH | 8bHH |
| Oaxaca | Ixtlán de Juárez   | 0.39 | 0.22 | 0.41 | 0.34 | 0.65 | 3 | 4 d | HH | 7dHH |
| Oaxaca | Juchitán de        |      |      |      |      |      |   |     |    |      |
| Oaxaca | Zaragoza           | 0.54 | 0.32 | 0.43 | 0.43 | 0.50 | 2 | 5 d | NS | 7dNS |
| Oaxaca | Loma Bonita        | 0.52 | 0.29 | 0.43 | 0.41 | 0.53 | 2 | 4 d | NS | 6dNS |

|        |                   |      |      |      |      |      |   |     |    |      |
|--------|-------------------|------|------|------|------|------|---|-----|----|------|
| Oaxaca | Magdalena Apasco  | 0.42 | 0.37 | 0.41 | 0.40 | 0.55 | 3 | 3 b | NS | 6bNS |
| Oaxaca | Magdalena         |      |      |      |      |      |   |     |    |      |
| Oaxaca | Jaltepec          | 0.27 | 0.19 | 0.27 | 0.24 | 0.82 | 4 | 2 v | LH | 6vLH |
| Oaxaca | Santa Magdalena   |      |      |      |      |      |   |     |    |      |
| Oaxaca | Jicotlán          | 0.26 | 0.20 | 0.51 | 0.32 | 0.68 | 3 | 3 b | LH | 6bLH |
| Oaxaca | Magdalena         |      |      |      |      |      |   |     |    |      |
| Oaxaca | Tlacotepec        | 0.37 | 0.34 | 0.45 | 0.39 | 0.57 | 3 | 5 d | NS | 8dNS |
| Oaxaca | Magdalena         |      |      |      |      |      |   |     |    |      |
| Oaxaca | Zahuatlán         | 0.26 | 0.21 | 0.43 | 0.30 | 0.72 | 4 | 2 v | LH | 6vLH |
| Oaxaca | Mariscala de      |      |      |      |      |      |   |     |    |      |
| Oaxaca | Juárez            | 0.24 | 0.24 | 0.34 | 0.27 | 0.77 | 4 | 3 v | LH | 7vLH |
| Oaxaca | Santo Domingo     |      |      |      |      |      |   |     |    |      |
| Oaxaca | Chihuitán         | 0.29 | 0.35 | 0.46 | 0.37 | 0.61 | 3 | 5 d | NS | 8dNS |
| Oaxaca | Magdalena         |      |      |      |      |      |   |     |    |      |
| Oaxaca | Mixtepec          | 0.21 | 0.15 | 0.32 | 0.23 | 0.84 | 4 | 2 v | LH | 6vLH |
| Oaxaca | Santo Domingo de  |      |      |      |      |      |   |     |    |      |
| Oaxaca | Morelos           | 0.19 | 0.19 | 0.43 | 0.27 | 0.78 | 4 | 4 b | HH | 8bHH |
| Oaxaca | Mártires de       |      |      |      |      |      |   |     |    |      |
| Oaxaca | Tacubaya          | 0.28 | 0.23 | 0.41 | 0.30 | 0.71 | 4 | 3 v | LH | 7vLH |
| Oaxaca | Matías Romero     |      |      |      |      |      |   |     |    |      |
| Oaxaca | Avendaño          | 0.46 | 0.26 | 0.37 | 0.36 | 0.61 | 3 | 4 d | NS | 7dNS |
| Oaxaca | Mazatlán Villa de |      |      |      |      |      |   |     |    |      |
| Oaxaca | Flores            | 0.17 | 0.16 | 0.22 | 0.19 | 0.91 | 4 | 4 b | HH | 8bHH |
| Oaxaca | Miahuatlán de     |      |      |      |      |      |   |     |    |      |
| Oaxaca | Porfirio Díaz     | 0.49 | 0.27 | 0.26 | 0.34 | 0.66 | 3 | 3 b | LH | 6bLH |
| Oaxaca | Natividad         | 0.32 | 0.31 | 0.51 | 0.38 | 0.58 | 3 | 4 d | NS | 7dNS |
| Oaxaca | Mixistlán de la   |      |      |      |      |      |   |     |    |      |
| Oaxaca | Reforma           | 0.24 | 0.16 | 0.46 | 0.29 | 0.74 | 4 | 3 v | LH | 7vLH |
| Oaxaca | Monjas            | 0.22 | 0.21 | 0.12 | 0.18 | 0.91 | 4 | 3 v | LH | 7vLH |
| Oaxaca | Pinotepa de Don   |      |      |      |      |      |   |     |    |      |
| Oaxaca | Luis              | 0.43 | 0.20 | 0.32 | 0.32 | 0.69 | 3 | 2 v | LH | 5vLH |
| Oaxaca | Nazareno Etla     | 0.59 | 0.32 | 0.24 | 0.38 | 0.58 | 3 | 3 b | NS | 6bNS |
| Oaxaca | Nejapa de Madero  | 0.32 | 0.23 | 0.40 | 0.32 | 0.69 | 3 | 3 b | LH | 6bLH |
| Oaxaca | La Pe             | 0.30 | 0.17 | 0.42 | 0.30 | 0.73 | 4 | 2 v | LH | 6vLH |
| Oaxaca | Pluma Hidalgo     | 0.21 | 0.21 | 0.31 | 0.24 | 0.82 | 4 | 4 b | HH | 8bHH |
| Oaxaca | Ixpantepec Nieves | 0.19 | 0.20 | 0.34 | 0.24 | 0.82 | 4 | 3 v | LH | 7vLH |
| Oaxaca | Santiago Niltepec | 0.37 | 0.24 | 0.65 | 0.42 | 0.52 | 2 | 4 d | HH | 6dHH |



|        |                    |      |      |      |      |      |   |     |    |      |
|--------|--------------------|------|------|------|------|------|---|-----|----|------|
| Oaxaca | Oaxaca de Juárez   | 0.67 | 0.38 | 0.44 | 0.50 | 0.39 | 2 | 3 d | NS | 5dNS |
| Oaxaca | Ocotlán de         |      |      |      |      |      |   |     |    |      |
| Oaxaca | Morelos            | 0.57 | 0.29 | 0.25 | 0.37 | 0.60 | 3 | 2 v | LH | 5vLH |
| Oaxaca | San José del       |      |      |      |      |      |   |     |    |      |
| Oaxaca | Progreso           | 0.36 | 0.19 | 0.19 | 0.25 | 0.81 | 4 | 2 v | LH | 6vLH |
| Oaxaca | Putla Villa de     |      |      |      |      |      |   |     |    |      |
| Oaxaca | Guerrero           | 0.41 | 0.26 | 0.45 | 0.38 | 0.59 | 3 | 2 v | LH | 5vLH |
| Oaxaca | Santa Catarina     |      |      |      |      |      |   |     |    |      |
| Oaxaca | Quioquitani        | 0.24 | 0.15 | 0.45 | 0.28 | 0.75 | 4 | 3 v | LH | 7vLH |
| Oaxaca | Reforma de         |      |      |      |      |      |   |     |    |      |
| Oaxaca | Pineda             | 0.51 | 0.24 | 0.45 | 0.40 | 0.55 | 3 | 3 b | NS | 6bNS |
| Oaxaca | La Reforma         | 0.31 | 0.21 | 0.42 | 0.31 | 0.70 | 3 | 2 v | LH | 5vLH |
| Oaxaca | Santo Domingo      |      |      |      |      |      |   |     |    |      |
| Oaxaca | Tonaltepec         | 0.22 | 0.17 | 0.18 | 0.19 | 0.90 | 4 | 2 v | LH | 6vLH |
| Oaxaca | Reyes Etla         | 0.36 | 0.32 | 0.25 | 0.31 | 0.70 | 3 | 3 b | NS | 6bNS |
| Oaxaca | Rojas de           |      |      |      |      |      |   |     |    |      |
| Oaxaca | Cuauhtémoc         | 0.33 | 0.36 | 0.40 | 0.36 | 0.61 | 3 | 2 v | NS | 5vNS |
| Oaxaca | San Agustín        |      |      |      |      |      |   |     |    |      |
| Oaxaca | Atenango           | 0.18 | 0.23 | 0.32 | 0.24 | 0.81 | 4 | 3 v | LH | 7vLH |
| Oaxaca | Salina Cruz        | 0.64 | 0.38 | 0.44 | 0.49 | 0.41 | 2 | 4 d | NS | 6dNS |
| Oaxaca | Yaxe               | 0.39 | 0.17 | 0.37 | 0.31 | 0.71 | 3 | 2 v | LH | 5vLH |
| Oaxaca | San Agustín        |      |      |      |      |      |   |     |    |      |
| Oaxaca | Amatengo           | 0.18 | 0.20 | 0.41 | 0.27 | 0.78 | 4 | 3 v | LH | 7vLH |
| Oaxaca | San Agustín Etla   | 0.63 | 0.36 | 0.49 | 0.49 | 0.40 | 2 | 3 d | NS | 5dNS |
| Oaxaca | San Agustín        |      |      |      |      |      |   |     |    |      |
| Oaxaca | Loxicha            | 0.23 | 0.16 | 0.29 | 0.23 | 0.84 | 4 | 4 b | HH | 8bHH |
| Oaxaca | San Agustín        |      |      |      |      |      |   |     |    |      |
| Oaxaca | Chayuco            | 0.23 | 0.18 | 0.35 | 0.25 | 0.80 | 4 | 2 v | LH | 6vLH |
| Oaxaca | San Agustín        |      |      |      |      |      |   |     |    |      |
| Oaxaca | Tlacotepec         | 0.26 | 0.19 | 0.38 | 0.28 | 0.76 | 4 | 2 v | LH | 6vLH |
| Oaxaca | Magdalena          |      |      |      |      |      |   |     |    |      |
| Oaxaca | Yodocono de        |      |      |      |      |      |   |     |    |      |
| Oaxaca | Porfirio Díaz      | 0.34 | 0.22 | 0.47 | 0.34 | 0.65 | 3 | 2 v | LH | 5vLH |
| Oaxaca | San Agustín de las |      |      |      |      |      |   |     |    |      |
| Oaxaca | Juntas             | 0.56 | 0.31 | 0.40 | 0.43 | 0.51 | 2 | 2 b | NS | 4bNS |
| Oaxaca | Zapotitlán Palmas  | 0.21 | 0.20 | 0.23 | 0.22 | 0.86 | 4 | 4 b | HH | 8bHH |

|        |                                     |      |      |      |      |      |   |     |    |      |
|--------|-------------------------------------|------|------|------|------|------|---|-----|----|------|
| Oaxaca | San Agustín<br>Yatareni             | 0.56 | 0.22 | 0.25 | 0.34 | 0.65 | 3 | 3 b | NS | 6bNS |
| Oaxaca | San Andrés<br>Cabecera Nueva        | 0.26 | 0.17 | 0.36 | 0.26 | 0.78 | 4 | 2 v | LH | 6vLH |
| Oaxaca | San Andrés<br>Dinicuiti             | 0.28 | 0.21 | 0.43 | 0.31 | 0.71 | 4 | 4 b | HH | 8bHH |
| Oaxaca | San Andrés<br>Huaxpaltepec          | 0.47 | 0.22 | 0.20 | 0.30 | 0.72 | 4 | 2 v | LH | 6vLH |
| Oaxaca | San Andrés<br>Huayápam              | 0.62 | 0.39 | 0.65 | 0.56 | 0.29 | 1 | 3 d | NS | 4dNS |
| Oaxaca | San Andrés<br>Ixtlahuaca            | 0.34 | 0.28 | 0.27 | 0.30 | 0.73 | 4 | 2 v | NS | 6vNS |
| Oaxaca | San Andrés<br>Lagunas               | 0.27 | 0.18 | 0.40 | 0.28 | 0.75 | 4 | 3 v | LH | 7vLH |
| Oaxaca | San Andrés<br>Nuxiño                | 0.29 | 0.16 | 0.27 | 0.24 | 0.82 | 4 | 2 v | LH | 6vLH |
| Oaxaca | San Andrés<br>Paxtlán               | 0.23 | 0.15 | 0.23 | 0.20 | 0.88 | 4 | 3 v | LH | 7vLH |
| Oaxaca | San Andrés Yaá<br>San Andrés        | 0.16 | 0.20 | 0.46 | 0.27 | 0.77 | 4 | 3 v | LH | 7vLH |
| Oaxaca | Zabache<br>San Baltazar             | 0.20 | 0.19 | 0.44 | 0.28 | 0.76 | 4 | 2 v | LH | 6vLH |
| Oaxaca | Chichicápam<br>San Baltazar         | 0.42 | 0.22 | 0.42 | 0.35 | 0.63 | 3 | 2 v | LH | 5vLH |
| Oaxaca | Loxicha                             | 0.32 | 0.20 | 0.32 | 0.28 | 0.76 | 4 | 3 v | LH | 7vLH |
| Oaxaca | San Andrés Zautla<br>San Dionisio   | 0.38 | 0.34 | 0.39 | 0.37 | 0.60 | 3 | 3 b | NS | 6bNS |
| Oaxaca | Ocotepes<br>San Antonino            | 0.48 | 0.19 | 0.38 | 0.35 | 0.64 | 3 | 2 v | LH | 5vLH |
| Oaxaca | Castillo Velasco<br>San Antonino el | 0.58 | 0.22 | 0.20 | 0.33 | 0.67 | 3 | 2 v | LH | 5vLH |
| Oaxaca | Alto<br>San Antonino                | 0.33 | 0.17 | 0.44 | 0.31 | 0.70 | 3 | 2 v | LH | 5vLH |
| Oaxaca | Monte Verde<br>San Antonio de la    | 0.23 | 0.16 | 0.35 | 0.25 | 0.81 | 4 | 3 v | LH | 7vLH |
| Oaxaca | Cal<br>San Antonio                  | 0.58 | 0.32 | 0.34 | 0.41 | 0.53 | 2 | 2 b | NS | 4bNS |
| Oaxaca | Huitepec                            | 0.24 | 0.19 | 0.36 | 0.26 | 0.78 | 4 | 2 v | LH | 6vLH |

|        |                                  |      |      |      |      |      |   |     |    |      |
|--------|----------------------------------|------|------|------|------|------|---|-----|----|------|
| Oaxaca | San Antonio<br>Nanahuatípam      | 0.32 | 0.28 | 0.43 | 0.35 | 0.64 | 3 | 2 v | NS | 5vNS |
| Oaxaca | San Antonio<br>Sinicahua         | 0.19 | 0.15 | 0.27 | 0.20 | 0.88 | 4 | 2 v | LH | 6vLH |
| Oaxaca | San Antonio<br>Tepetlapa         | 0.27 | 0.17 | 0.21 | 0.22 | 0.86 | 4 | 2 v | LH | 6vLH |
| Oaxaca | San Baltazar<br>Yatzachi el Bajo | 0.20 | 0.19 | 0.47 | 0.29 | 0.74 | 4 | 3 v | LH | 7vLH |
| Oaxaca | San Bartolo<br>Coyotepec         | 0.58 | 0.37 | 0.39 | 0.45 | 0.48 | 2 | 2 b | NS | 4bNS |
| Oaxaca | San Bartolomé<br>Ayautla         | 0.30 | 0.16 | 0.46 | 0.30 | 0.71 | 4 | 5 d | HH | 9dHH |
| Oaxaca | San Bartolomé<br>Loxicha         | 0.25 | 0.18 | 0.35 | 0.26 | 0.79 | 4 | 3 v | LH | 7vLH |
| Oaxaca | San Bartolomé<br>Quialana        | 0.32 | 0.20 | 0.39 | 0.30 | 0.71 | 4 | 3 v | LH | 7vLH |
| Oaxaca | San Bartolomé<br>Yucuañe         | 0.21 | 0.16 | 0.38 | 0.25 | 0.80 | 4 | 2 v | LH | 6vLH |
| Oaxaca | San Bartolomé<br>Zoogocho        | 0.21 | 0.21 | 0.44 | 0.28 | 0.75 | 4 | 3 v | LH | 7vLH |
| Oaxaca | San Bartolo<br>Soyaltepec        | 0.23 | 0.22 | 0.39 | 0.28 | 0.75 | 4 | 2 v | LH | 6vLH |
| Oaxaca | San Bartolo<br>Yautepec          | 0.31 | 0.19 | 0.40 | 0.30 | 0.72 | 4 | 3 v | LH | 7vLH |
| Oaxaca | San Bernardo<br>Mixtepec         | 0.26 | 0.18 | 0.30 | 0.25 | 0.81 | 4 | 2 v | LH | 6vLH |
| Oaxaca | San Blas Atempa<br>San Carlos    | 0.39 | 0.24 | 0.37 | 0.33 | 0.67 | 3 | 5 d | NS | 8dNS |
| Oaxaca | Yautepec<br>San Juan             | 0.27 | 0.17 | 0.35 | 0.26 | 0.78 | 4 | 3 v | LH | 7vLH |
| Oaxaca | Ihualtepec<br>San Cristóbal      | 0.16 | 0.17 | 0.28 | 0.20 | 0.89 | 4 | 3 v | LH | 7vLH |
| Oaxaca | Amatlán<br>San Cristóbal         | 0.36 | 0.16 | 0.42 | 0.31 | 0.70 | 3 | 3 b | LH | 6bLH |
| Oaxaca | Amoltepec                        | 0.23 | 0.16 | 0.21 | 0.20 | 0.89 | 4 | 2 v | LH | 6vLH |
| Oaxaca | San Juan Lajarcia                | 0.29 | 0.20 | 0.41 | 0.30 | 0.72 | 4 | 3 v | LH | 7vLH |
| Oaxaca | San Juan Lalana                  | 0.24 | 0.18 | 0.32 | 0.25 | 0.81 | 4 | 4 b | HH | 8bHH |

|        |                              |      |      |      |      |      |   |     |    |      |
|--------|------------------------------|------|------|------|------|------|---|-----|----|------|
| Oaxaca | San Cristóbal Lachirioag     | 0.30 | 0.22 | 0.51 | 0.34 | 0.65 | 3 | 4 d | HH | 7dHH |
| Oaxaca | San Cristóbal Suchixtlahuaca | 0.30 | 0.27 | 0.49 | 0.36 | 0.63 | 3 | 2 v | LH | 5vLH |
| Oaxaca | San Dionisio del Mar         | 0.37 | 0.21 | 0.29 | 0.29 | 0.74 | 4 | 4 b | NS | 8bNS |
| Oaxaca | San Dionisio Ocotlán         | 0.36 | 0.29 | 0.31 | 0.32 | 0.69 | 3 | 2 v | LH | 5vLH |
| Oaxaca | San Esteban Atatlahuca       | 0.27 | 0.16 | 0.28 | 0.24 | 0.83 | 4 | 2 v | LH | 6vLH |
| Oaxaca | San Felipe Jalapa de Díaz    | 0.27 | 0.17 | 0.25 | 0.23 | 0.84 | 4 | 5 d | HH | 9dHH |
| Oaxaca | San Felipe Tejalápam         | 0.37 | 0.23 | 0.30 | 0.30 | 0.72 | 4 | 2 v | NS | 6vNS |
| Oaxaca | San Felipe Usila             | 0.40 | 0.17 | 0.41 | 0.33 | 0.68 | 3 | 4 d | HH | 7dHH |
| Oaxaca | San Francisco Cahuacuá       | 0.27 | 0.16 | 0.25 | 0.23 | 0.84 | 4 | 2 v | LH | 6vLH |
| Oaxaca | San Francisco Cajonos        | 0.30 | 0.22 | 0.47 | 0.33 | 0.67 | 3 | 3 b | LH | 6bLH |
| Oaxaca | San Francisco Chapulapa      | 0.22 | 0.16 | 0.37 | 0.25 | 0.81 | 4 | 4 b | HH | 8bHH |
| Oaxaca | San Francisco Huehuetlán     | 0.11 | 0.17 | 0.36 | 0.21 | 0.86 | 4 | 4 b | HH | 8bHH |
| Oaxaca | San Francisco Ixhuatán       | 0.41 | 0.23 | 0.44 | 0.36 | 0.62 | 3 | 4 d | NS | 7dNS |
| Oaxaca | San Francisco Chindúa        | 0.33 | 0.19 | 0.46 | 0.33 | 0.68 | 3 | 2 v | LH | 5vLH |
| Oaxaca | San Francisco del Mar        | 0.42 | 0.20 | 0.33 | 0.32 | 0.69 | 3 | 4 d | NS | 7dNS |
| Oaxaca | San Francisco Jaltepetongo   | 0.26 | 0.18 | 0.30 | 0.24 | 0.81 | 4 | 2 v | LH | 6vLH |
| Oaxaca | San Francisco Lachigoló      | 0.45 | 0.31 | 0.22 | 0.33 | 0.67 | 3 | 3 b | NS | 6bNS |
| Oaxaca | San Francisco Tlapancingo    | 0.16 | 0.17 | 0.29 | 0.21 | 0.88 | 4 | 3 v | LH | 7vLH |
| Oaxaca | San Gabriel Mixtepec         | 0.47 | 0.20 | 0.33 | 0.33 | 0.67 | 3 | 3 b | LH | 6bLH |

|        |                                           |      |      |      |      |      |   |     |    |      |
|--------|-------------------------------------------|------|------|------|------|------|---|-----|----|------|
| Oaxaca | San Ildefonso<br>Amatlán                  | 0.22 | 0.18 | 0.35 | 0.25 | 0.80 | 4 | 3 v | LH | 7vLH |
| Oaxaca | San Ildefonso Sola<br>San Ildefonso Villa | 0.24 | 0.17 | 0.21 | 0.21 | 0.88 | 4 | 2 v | LH | 6vLH |
| Oaxaca | Alta                                      | 0.31 | 0.23 | 0.48 | 0.34 | 0.65 | 3 | 4 d | HH | 7dHH |
| Oaxaca | San Francisco<br>Logueche                 | 0.19 | 0.16 | 0.22 | 0.19 | 0.91 | 4 | 3 v | LH | 7vLH |
| Oaxaca | San Francisco<br>Nuxaño                   | 0.29 | 0.17 | 0.32 | 0.26 | 0.79 | 4 | 2 v | LH | 6vLH |
| Oaxaca | San Francisco<br>Ozolotepec               | 0.22 | 0.15 | 0.44 | 0.27 | 0.77 | 4 | 3 v | LH | 7vLH |
| Oaxaca | San Francisco<br>Sola                     | 0.24 | 0.22 | 0.43 | 0.30 | 0.73 | 4 | 3 v | LH | 7vLH |
| Oaxaca | San Francisco<br>Telixtlahuaca            | 0.53 | 0.28 | 0.41 | 0.40 | 0.55 | 3 | 3 b | LH | 6bLH |
| Oaxaca | San Francisco<br>Teopan                   | 0.28 | 0.16 | 0.49 | 0.31 | 0.71 | 3 | 3 b | LH | 6bLH |
| Oaxaca | San Jacinto<br>Amilpas                    | 0.62 | 0.39 | 0.39 | 0.46 | 0.45 | 2 | 3 d | NS | 5dNS |
| Oaxaca | San Jerónimo<br>Silacayoapilla            | 0.26 | 0.24 | 0.25 | 0.25 | 0.81 | 4 | 4 b | HH | 8bHH |
| Oaxaca | San Jerónimo<br>Sosola                    | 0.26 | 0.19 | 0.29 | 0.24 | 0.81 | 4 | 3 v | LH | 7vLH |
| Oaxaca | San Jacinto<br>Tlacotepec                 | 0.28 | 0.17 | 0.13 | 0.19 | 0.90 | 4 | 2 v | LH | 6vLH |
| Oaxaca | San Jerónimo<br>Coatlán                   | 0.24 | 0.16 | 0.34 | 0.25 | 0.81 | 4 | 3 v | LH | 7vLH |
| Oaxaca | San Jerónimo<br>Taviche                   | 0.26 | 0.18 | 0.15 | 0.20 | 0.89 | 4 | 2 v | LH | 6vLH |
| Oaxaca | San Jerónimo<br>Tecóatl                   | 0.18 | 0.19 | 0.33 | 0.23 | 0.84 | 4 | 4 b | HH | 8bHH |
| Oaxaca | San Jorge Nuchita                         | 0.23 | 0.20 | 0.58 | 0.34 | 0.66 | 3 | 3 b | LH | 6bLH |
| Oaxaca | San Juan Achiutla                         | 0.23 | 0.20 | 0.45 | 0.30 | 0.73 | 4 | 2 v | LH | 6vLH |
| Oaxaca | San José Ayuquila<br>San José             | 0.21 | 0.20 | 0.28 | 0.23 | 0.84 | 4 | 3 v | LH | 7vLH |
| Oaxaca | Chiltepec                                 | 0.36 | 0.28 | 0.45 | 0.36 | 0.62 | 3 | 5 d | NS | 8dNS |

|        |                                   |      |      |      |      |      |   |     |    |      |
|--------|-----------------------------------|------|------|------|------|------|---|-----|----|------|
| Oaxaca | San José del Peñasco              | 0.28 | 0.18 | 0.35 | 0.27 | 0.77 | 4 | 3 v | LH | 7vLH |
| Oaxaca | San José Estancia Grande          | 0.21 | 0.26 | 0.37 | 0.28 | 0.75 | 4 | 3 v | LH | 7vLH |
| Oaxaca | San José Independencia            | 0.22 | 0.17 | 0.15 | 0.18 | 0.91 | 4 | 5 d | HH | 9dHH |
| Oaxaca | San José Lachiguiri               | 0.19 | 0.16 | 0.17 | 0.17 | 0.93 | 4 | 3 v | LH | 7vLH |
| Oaxaca | San José Tenango                  | 0.13 | 0.17 | 0.19 | 0.16 | 0.95 | 4 | 5 d | HH | 9dHH |
| Oaxaca | San Juan Atepec                   | 0.30 | 0.19 | 0.49 | 0.33 | 0.67 | 3 | 4 d | HH | 7dHH |
| Oaxaca | Ánimas Trujano                    | 0.62 | 0.33 | 0.37 | 0.44 | 0.48 | 2 | 2 b | NS | 4bNS |
| Oaxaca | San Juan Bautista Atlatluca       | 0.27 | 0.17 | 0.40 | 0.28 | 0.76 | 4 | 3 v | LH | 7vLH |
| Oaxaca | San Juan Coatzacoapam             | 0.19 | 0.16 | 0.27 | 0.21 | 0.88 | 4 | 5 d | HH | 9dHH |
| Oaxaca | San Juan Bautista Coixtlahuaca    | 0.30 | 0.20 | 0.29 | 0.26 | 0.78 | 4 | 2 v | LH | 6vLH |
| Oaxaca | San Juan Bautista Cuicatlán       | 0.37 | 0.25 | 0.44 | 0.35 | 0.63 | 3 | 3 b | LH | 6bLH |
| Oaxaca | San Juan Colorado                 | 0.39 | 0.19 | 0.42 | 0.33 | 0.67 | 3 | 2 v | LH | 5vLH |
| Oaxaca | San Juan Bautista Guelache        | 0.33 | 0.36 | 0.35 | 0.35 | 0.64 | 3 | 3 b | NS | 6bNS |
| Oaxaca | San Juan Bautista Jayacatlán      | 0.27 | 0.20 | 0.47 | 0.31 | 0.70 | 3 | 3 b | LH | 6bLH |
| Oaxaca | San Juan Bautista Lo de Soto      | 0.23 | 0.27 | 0.48 | 0.33 | 0.67 | 3 | 3 b | LH | 6bLH |
| Oaxaca | San Juan Chicomezúchil            | 0.36 | 0.36 | 0.47 | 0.40 | 0.56 | 3 | 3 b | NS | 6bNS |
| Oaxaca | San Juan Bautista Suchitepec      | 0.29 | 0.19 | 0.33 | 0.27 | 0.77 | 4 | 3 v | LH | 7vLH |
| Oaxaca | San Juan Evangelista Analco       | 0.30 | 0.22 | 0.49 | 0.34 | 0.66 | 3 | 3 b | LH | 6bLH |
| Oaxaca | San Juan Bautista Tlacoatzintepec | 0.19 | 0.15 | 0.45 | 0.26 | 0.78 | 4 | 4 b | HH | 8bHH |
| Oaxaca | San Juan Guelavía                 | 0.50 | 0.20 | 0.29 | 0.33 | 0.66 | 3 | 3 b | LH | 6bLH |
| Oaxaca | San Juan Guichicovi               | 0.26 | 0.24 | 0.37 | 0.29 | 0.74 | 4 | 3 v | LH | 7vLH |

|        |                                   |      |      |      |      |      |   |     |    |      |
|--------|-----------------------------------|------|------|------|------|------|---|-----|----|------|
| Oaxaca | San Juan Bautista<br>Tlachichilco | 0.22 | 0.17 | 0.23 | 0.21 | 0.87 | 4 | 3 v | LH | 7vLH |
| Oaxaca | San Juan Bautista<br>Tuxtepec     | 0.51 | 0.32 | 0.41 | 0.41 | 0.53 | 2 | 5 d | NS | 7dNS |
| Oaxaca | San Juan<br>Cacahuatpec           | 0.45 | 0.23 | 0.41 | 0.36 | 0.62 | 3 | 3 b | LH | 6bLH |
| Oaxaca | San Juan<br>Cieneguilla           | 0.18 | 0.23 | 0.36 | 0.26 | 0.79 | 4 | 3 v | LH | 7vLH |
| Oaxaca | San Juan<br>Comaltepec            | 0.25 | 0.15 | 0.31 | 0.24 | 0.83 | 4 | 4 b | HH | 8bHH |
| Oaxaca | San Juan<br>Cotzocón              | 0.32 | 0.24 | 0.26 | 0.27 | 0.76 | 4 | 3 v | LH | 7vLH |
| Oaxaca | San Juan<br>Chilateca             | 0.36 | 0.35 | 0.37 | 0.36 | 0.62 | 3 | 2 v | LH | 5vLH |
| Oaxaca | San Juan del<br>Estado            | 0.43 | 0.25 | 0.46 | 0.38 | 0.58 | 3 | 3 b | LH | 6bLH |
| Oaxaca | Santiago Nundiche                 | 0.25 | 0.16 | 0.25 | 0.22 | 0.86 | 4 | 3 v | LH | 7vLH |
| Oaxaca | San Juan del Río                  | 0.28 | 0.23 | 0.47 | 0.33 | 0.68 | 3 | 3 b | LH | 6bLH |
| Oaxaca | San Juan Diuxi                    | 0.20 | 0.17 | 0.26 | 0.21 | 0.87 | 4 | 2 v | LH | 6vLH |
| Oaxaca | San Juan Juquila                  |      |      |      |      |      |   |     |    |      |
| Oaxaca | Mixes                             | 0.15 | 0.17 | 0.45 | 0.26 | 0.79 | 4 | 3 v | LH | 7vLH |
| Oaxaca | Santiago Nuyoó                    | 0.28 | 0.16 | 0.38 | 0.28 | 0.76 | 4 | 2 v | LH | 6vLH |
| Oaxaca | Santiago Pinotepa<br>Nacional     | 0.48 | 0.28 | 0.26 | 0.34 | 0.66 | 3 | 2 v | LH | 5vLH |
| Oaxaca | San Juan Juquila<br>Vijanos       | 0.32 | 0.17 | 0.46 | 0.32 | 0.69 | 3 | 4 d | HH | 7dHH |
| Oaxaca | San Juan Lachao                   | 0.24 | 0.20 | 0.32 | 0.25 | 0.80 | 4 | 3 v | LH | 7vLH |
| Oaxaca | San Juan<br>Lachigalla            | 0.23 | 0.15 | 0.13 | 0.17 | 0.94 | 4 | 2 v | LH | 6vLH |
| Oaxaca | San Juan de los<br>Cués           | 0.34 | 0.23 | 0.48 | 0.35 | 0.64 | 3 | 3 b | LH | 6bLH |
| Oaxaca | San Juan Mazatlán                 | 0.22 | 0.20 | 0.34 | 0.25 | 0.80 | 4 | 3 v | LH | 7vLH |
| Oaxaca | San Juan Numí                     | 0.26 | 0.16 | 0.28 | 0.23 | 0.83 | 4 | 3 v | LH | 7vLH |
| Oaxaca | San Juan<br>Ozolotepec            | 0.17 | 0.15 | 0.40 | 0.24 | 0.82 | 4 | 3 v | LH | 7vLH |
| Oaxaca | San Juan Petlapa                  | 0.17 | 0.15 | 0.31 | 0.21 | 0.87 | 4 | 4 b | HH | 8bHH |
| Oaxaca | San Juan Quiahije                 | 0.19 | 0.18 | 0.43 | 0.26 | 0.78 | 4 | 2 v | LH | 6vLH |

|        |                             |      |      |      |      |      |   |     |    |      |
|--------|-----------------------------|------|------|------|------|------|---|-----|----|------|
| Oaxaca | San Juan Quiotepec          | 0.19 | 0.18 | 0.49 | 0.29 | 0.74 | 4 | 4 b | HH | 8bHH |
| Oaxaca | San Juan Mixtepec           | 0.15 | 0.18 | 0.31 | 0.21 | 0.87 | 4 | 3 v | LH | 7vLH |
| Oaxaca | San Juan Mixtepec           | 0.20 | 0.18 | 0.44 | 0.27 | 0.77 | 4 | 3 v | LH | 7vLH |
| Oaxaca | Santiago Tillo              | 0.30 | 0.24 | 0.33 | 0.29 | 0.73 | 4 | 2 v | NS | 6vNS |
| Oaxaca | San Juan Sayultepec         | 0.32 | 0.27 | 0.36 | 0.32 | 0.69 | 3 | 2 v | LH | 5vLH |
| Oaxaca | San Juan Teita              | 0.19 | 0.15 | 0.57 | 0.30 | 0.72 | 4 | 2 v | LH | 6vLH |
| Oaxaca | San Miguel Tilquiápam       | 0.38 | 0.15 | 0.43 | 0.32 | 0.69 | 3 | 2 v | LH | 5vLH |
| Oaxaca | San Juan Tabaá              | 0.32 | 0.18 | 0.48 | 0.32 | 0.68 | 3 | 4 d | HH | 7dHH |
| Oaxaca | San Juan Tamazola           | 0.23 | 0.15 | 0.21 | 0.20 | 0.89 | 4 | 2 v | LH | 6vLH |
| Oaxaca | San Juan Teitipac           | 0.45 | 0.18 | 0.36 | 0.33 | 0.66 | 3 | 2 v | LH | 5vLH |
| Oaxaca | San Juan Tepeuxila          | 0.30 | 0.16 | 0.42 | 0.29 | 0.73 | 4 | 4 b | HH | 8bHH |
| Oaxaca | San Juan Teposcolula        | 0.26 | 0.21 | 0.25 | 0.24 | 0.82 | 4 | 2 v | LH | 6vLH |
| Oaxaca | San Juan Yaeé               | 0.31 | 0.17 | 0.50 | 0.33 | 0.68 | 3 | 4 d | HH | 7dHH |
| Oaxaca | San Juan Yatzona            | 0.31 | 0.16 | 0.48 | 0.32 | 0.69 | 3 | 4 d | NS | 7dNS |
| Oaxaca | San Lucas Quiaviní          | 0.19 | 0.19 | 0.44 | 0.27 | 0.77 | 4 | 2 v | LH | 6vLH |
| Oaxaca | San Juan Yucuita            | 0.31 | 0.27 | 0.41 | 0.33 | 0.67 | 3 | 2 v | LH | 5vLH |
| Oaxaca | San Martín de los Cansecos  | 0.29 | 0.18 | 0.38 | 0.28 | 0.75 | 4 | 2 v | LH | 6vLH |
| Oaxaca | Santiago Yaitepec           | 0.35 | 0.16 | 0.40 | 0.30 | 0.72 | 4 | 2 v | LH | 6vLH |
| Oaxaca | Santiago Yaveo              | 0.24 | 0.21 | 0.21 | 0.22 | 0.85 | 4 | 3 v | LH | 7vLH |
| Oaxaca | San Lorenzo                 | 0.19 | 0.18 | 0.30 | 0.22 | 0.85 | 4 | 2 v | LH | 6vLH |
| Oaxaca | San Mateo del Mar           | 0.32 | 0.19 | 0.27 | 0.26 | 0.78 | 4 | 5 d | NS | 9dNS |
| Oaxaca | San Lorenzo Albarradas      | 0.28 | 0.19 | 0.35 | 0.27 | 0.76 | 4 | 3 v | LH | 7vLH |
| Oaxaca | San Lorenzo Cacaotepec      | 0.63 | 0.34 | 0.44 | 0.47 | 0.43 | 2 | 3 d | NS | 5dNS |
| Oaxaca | San Lorenzo Cuaunecuiltitla | 0.13 | 0.15 | 0.39 | 0.22 | 0.85 | 4 | 4 b | HH | 8bHH |



|        |                          |      |      |      |      |      |   |     |    |      |
|--------|--------------------------|------|------|------|------|------|---|-----|----|------|
| Oaxaca | San Lorenzo Texmelúcan   | 0.21 | 0.15 | 0.38 | 0.24 | 0.81 | 4 | 2 v | LH | 6vLH |
| Oaxaca | San Lorenzo Victoria     | 0.23 | 0.23 | 0.39 | 0.29 | 0.74 | 4 | 3 v | LH | 7vLH |
| Oaxaca | San Lucas Camotlán       | 0.29 | 0.16 | 0.32 | 0.26 | 0.79 | 4 | 3 v | LH | 7vLH |
| Oaxaca | San Lucas Ojitlán        | 0.40 | 0.18 | 0.31 | 0.30 | 0.73 | 4 | 5 d | HH | 9dHH |
| Oaxaca | San Lucas Zoquiápam      | 0.15 | 0.16 | 0.33 | 0.21 | 0.87 | 4 | 4 b | HH | 8bHH |
| Oaxaca | San Luis Amatlán         | 0.21 | 0.18 | 0.19 | 0.19 | 0.90 | 4 | 3 v | LH | 7vLH |
| Oaxaca | San Marcial Ozolotepec   | 0.19 | 0.16 | 0.37 | 0.24 | 0.82 | 4 | 3 v | LH | 7vLH |
| Oaxaca | San Marcos Arteaga       | 0.26 | 0.25 | 0.34 | 0.29 | 0.74 | 4 | 4 b | HH | 8bHH |
| Oaxaca | San Martín Huamelúlpam   | 0.30 | 0.21 | 0.21 | 0.24 | 0.82 | 4 | 3 v | LH | 7vLH |
| Oaxaca | San Mateo Yolochochitlán | 0.35 | 0.17 | 0.31 | 0.28 | 0.75 | 4 | 4 b | HH | 8bHH |
| Oaxaca | San Martín Itunyoso      | 0.15 | 0.15 | 0.18 | 0.16 | 0.95 | 4 | 2 v | LH | 6vLH |
| Oaxaca | San Martín Lachilá       | 0.26 | 0.22 | 0.41 | 0.30 | 0.72 | 4 | 2 v | LH | 6vLH |
| Oaxaca | San Martín Peras         | 0.16 | 0.15 | 0.30 | 0.20 | 0.88 | 4 | 2 v | LH | 6vLH |
| Oaxaca | San Martín Tilcajete     | 0.32 | 0.28 | 0.38 | 0.33 | 0.68 | 3 | 2 v | NS | 5vNS |
| Oaxaca | San Martín Toxpalan      | 0.29 | 0.22 | 0.45 | 0.32 | 0.68 | 3 | 3 b | LH | 6bLH |
| Oaxaca | San Miguel Aloápam       | 0.24 | 0.17 | 0.50 | 0.30 | 0.72 | 4 | 3 v | LH | 7vLH |
| Oaxaca | San Miguel Amatitlán     | 0.20 | 0.17 | 0.26 | 0.21 | 0.87 | 4 | 3 v | LH | 7vLH |
| Oaxaca | San Miguel Amatlán       | 0.33 | 0.20 | 0.48 | 0.34 | 0.66 | 3 | 3 b | NS | 6bNS |
| Oaxaca | San Martín Zacatepec     | 0.21 | 0.20 | 0.16 | 0.19 | 0.91 | 4 | 3 v | LH | 7vLH |
| Oaxaca | San Mateo Cajonos        | 0.22 | 0.18 | 0.48 | 0.29 | 0.73 | 4 | 3 v | LH | 7vLH |

|        |                                   |      |      |      |      |      |   |     |    |      |
|--------|-----------------------------------|------|------|------|------|------|---|-----|----|------|
| Oaxaca | San Miguel<br>Coatlán             | 0.19 | 0.18 | 0.26 | 0.21 | 0.88 | 4 | 3 v | LH | 7vLH |
| Oaxaca | Capulálpam de<br>Méndez           | 0.35 | 0.35 | 0.51 | 0.41 | 0.54 | 3 | 4 d | HH | 7dHH |
| Oaxaca | San Miguel<br>Chichahua           | 0.21 | 0.16 | 0.28 | 0.22 | 0.86 | 4 | 2 v | LH | 6vLH |
| Oaxaca | San Mateo<br>Etlatongo            | 0.34 | 0.22 | 0.36 | 0.31 | 0.70 | 3 | 2 v | LH | 5vLH |
| Oaxaca | San Mateo<br>Nejápam              | 0.20 | 0.16 | 0.32 | 0.23 | 0.84 | 4 | 3 v | LH | 7vLH |
| Oaxaca | San Miguel<br>Chimalapa           | 0.22 | 0.21 | 0.32 | 0.25 | 0.81 | 4 | 3 v | NS | 7vNS |
| Oaxaca | San Miguel del<br>Puerto          | 0.25 | 0.23 | 0.35 | 0.28 | 0.76 | 4 | 3 v | LH | 7vLH |
| Oaxaca | San Miguel del Río<br>San Mateo   | 0.40 | 0.20 | 0.48 | 0.36 | 0.62 | 3 | 3 b | LH | 6bLH |
| Oaxaca | Peñasco                           | 0.16 | 0.17 | 0.38 | 0.24 | 0.83 | 4 | 2 v | LH | 6vLH |
| Oaxaca | San Mateo Piñas                   | 0.21 | 0.18 | 0.25 | 0.21 | 0.86 | 4 | 4 b | HH | 8bHH |
| Oaxaca | San Mateo Río<br>Hondo            | 0.27 | 0.18 | 0.37 | 0.27 | 0.76 | 4 | 3 v | LH | 7vLH |
| Oaxaca | San Mateo<br>Sindihui             | 0.19 | 0.17 | 0.33 | 0.23 | 0.84 | 4 | 2 v | LH | 6vLH |
| Oaxaca | San Mateo<br>Tlapiltepec          | 0.23 | 0.20 | 0.50 | 0.31 | 0.70 | 3 | 3 b | LH | 6bLH |
| Oaxaca | San Miguel Santa<br>Flor          | 0.14 | 0.17 | 0.35 | 0.22 | 0.85 | 4 | 4 b | HH | 8bHH |
| Oaxaca | Villa Sola de Vega<br>San Melchor | 0.28 | 0.21 | 0.25 | 0.25 | 0.81 | 4 | 2 v | LH | 6vLH |
| Oaxaca | Betaza                            | 0.17 | 0.17 | 0.49 | 0.28 | 0.76 | 4 | 3 v | LH | 7vLH |
| Oaxaca | San Miguel<br>Soyaltepec          | 0.31 | 0.22 | 0.31 | 0.28 | 0.75 | 4 | 5 d | HH | 9dHH |
| Oaxaca | San Miguel<br>Suchixtepec         | 0.24 | 0.18 | 0.42 | 0.28 | 0.75 | 4 | 3 v | LH | 7vLH |
| Oaxaca | San Miguel<br>Achiutla            | 0.26 | 0.18 | 0.41 | 0.28 | 0.75 | 4 | 2 v | LH | 6vLH |
| Oaxaca | San Miguel<br>Ahuehuetitlán       | 0.13 | 0.17 | 0.34 | 0.21 | 0.87 | 4 | 3 v | LH | 7vLH |

|        |                   |      |      |      |      |      |   |     |    |      |
|--------|-------------------|------|------|------|------|------|---|-----|----|------|
| Oaxaca | San Miguel Ejutla | 0.32 | 0.26 | 0.40 | 0.33 | 0.67 | 3 | 2 v | LH | 5vLH |
| Oaxaca | San Miguel        |      |      |      |      |      |   |     |    |      |
| Oaxaca | Tecomatlán        | 0.29 | 0.22 | 0.45 | 0.32 | 0.69 | 3 | 2 v | LH | 5vLH |
| Oaxaca | San Miguel el     |      |      |      |      |      |   |     |    |      |
| Oaxaca | Grande            | 0.28 | 0.22 | 0.44 | 0.32 | 0.69 | 3 | 2 v | LH | 5vLH |
| Oaxaca | San Miguel        |      |      |      |      |      |   |     |    |      |
| Oaxaca | Huautla           | 0.18 | 0.16 | 0.26 | 0.20 | 0.89 | 4 | 2 v | LH | 6vLH |
| Oaxaca | San Miguel        |      |      |      |      |      |   |     |    |      |
| Oaxaca | Mixtepec          | 0.18 | 0.15 | 0.44 | 0.26 | 0.79 | 4 | 2 v | LH | 6vLH |
| Oaxaca | San Miguel        |      |      |      |      |      |   |     |    |      |
| Oaxaca | Panixtlahuaca     | 0.38 | 0.16 | 0.42 | 0.32 | 0.68 | 3 | 2 v | LH | 5vLH |
| Oaxaca | San Miguel Peras  | 0.27 | 0.16 | 0.23 | 0.22 | 0.85 | 4 | 2 v | LH | 6vLH |
| Oaxaca | San Miguel        |      |      |      |      |      |   |     |    |      |
| Oaxaca | Piedras           | 0.32 | 0.15 | 0.29 | 0.25 | 0.80 | 4 | 2 v | LH | 6vLH |
| Oaxaca | San Miguel        |      |      |      |      |      |   |     |    |      |
| Oaxaca | Quetzaltepec      | 0.32 | 0.16 | 0.43 | 0.30 | 0.72 | 4 | 3 v | LH | 7vLH |
| Oaxaca | Villa Talea de    |      |      |      |      |      |   |     |    |      |
| Oaxaca | Castro            | 0.38 | 0.21 | 0.51 | 0.37 | 0.61 | 3 | 4 d | NS | 7dNS |
| Oaxaca | San Miguel        |      |      |      |      |      |   |     |    |      |
| Oaxaca | Tenango           | 0.27 | 0.16 | 0.41 | 0.28 | 0.75 | 4 | 4 b | NS | 8bNS |
| Oaxaca | San Miguel        |      |      |      |      |      |   |     |    |      |
| Oaxaca | Tequixtepec       | 0.31 | 0.19 | 0.39 | 0.30 | 0.72 | 4 | 2 v | LH | 6vLH |
| Oaxaca | San Miguel        |      |      |      |      |      |   |     |    |      |
| Oaxaca | Tlacamama         | 0.29 | 0.23 | 0.23 | 0.25 | 0.80 | 4 | 2 v | LH | 6vLH |
| Oaxaca | Santiago          |      |      |      |      |      |   |     |    |      |
| Oaxaca | Zacatepec         | 0.17 | 0.17 | 0.36 | 0.23 | 0.83 | 4 | 3 v | LH | 7vLH |
| Oaxaca | San Miguel        |      |      |      |      |      |   |     |    |      |
| Oaxaca | Tlacotepec        | 0.26 | 0.21 | 0.29 | 0.25 | 0.80 | 4 | 3 v | LH | 7vLH |
| Oaxaca | San Miguel        |      |      |      |      |      |   |     |    |      |
| Oaxaca | Tulancingo        | 0.26 | 0.23 | 0.62 | 0.37 | 0.60 | 3 | 3 b | LH | 6bLH |
| Oaxaca | San Miguel Yotao  | 0.33 | 0.16 | 0.37 | 0.28 | 0.75 | 4 | 4 b | NS | 8bNS |
| Oaxaca | Santiago Zoochila | 0.28 | 0.20 | 0.42 | 0.30 | 0.72 | 4 | 3 v | LH | 7vLH |
| Oaxaca | San Nicolás       | 0.20 | 0.22 | 0.36 | 0.26 | 0.78 | 4 | 3 v | LH | 7vLH |
| Oaxaca | San Nicolás       |      |      |      |      |      |   |     |    |      |
| Oaxaca | Hidalgo           | 0.23 | 0.23 | 0.31 | 0.26 | 0.79 | 4 | 3 v | LH | 7vLH |
| Oaxaca | San Pablo Coatlán | 0.27 | 0.17 | 0.35 | 0.26 | 0.78 | 4 | 3 v | LH | 7vLH |

|        |                          |      |      |      |      |      |   |     |    |      |
|--------|--------------------------|------|------|------|------|------|---|-----|----|------|
| Oaxaca | San Pablo Cuatro Venados | 0.33 | 0.15 | 0.17 | 0.22 | 0.86 | 4 | 2 v | LH | 6vLH |
| Oaxaca | San Pablo Etla           | 0.57 | 0.40 | 0.55 | 0.51 | 0.37 | 2 | 3 d | NS | 5dNS |
| Oaxaca | San Pablo Huitzo         | 0.55 | 0.29 | 0.24 | 0.36 | 0.62 | 3 | 3 b | LH | 6bLH |
| Oaxaca | San Pablo Huixtepec      | 0.54 | 0.28 | 0.48 | 0.43 | 0.50 | 2 | 2 b | LH | 4bLH |
| Oaxaca | San Pablo Yaganiza       | 0.28 | 0.19 | 0.52 | 0.33 | 0.67 | 3 | 3 b | LH | 6bLH |
| Oaxaca | San Pablo Macuiltianguis | 0.29 | 0.20 | 0.47 | 0.32 | 0.69 | 3 | 4 d | HH | 7dHH |
| Oaxaca | San Pablo Tijaltepec     | 0.21 | 0.15 | 0.38 | 0.25 | 0.81 | 4 | 2 v | LH | 6vLH |
| Oaxaca | San Pablo Villa de Mitla | 0.48 | 0.25 | 0.31 | 0.35 | 0.64 | 3 | 2 v | LH | 5vLH |
| Oaxaca | San Pedro Coxcaltepec    | 0.30 | 0.16 | 0.52 | 0.32 | 0.68 | 3 | 2 v | LH | 5vLH |
| Oaxaca | San Pedro Amuzgos        | 0.45 | 0.19 | 0.28 | 0.31 | 0.71 | 4 | 2 v | LH | 6vLH |
| Oaxaca | San Pedro Jaltepetongo   | 0.18 | 0.17 | 0.37 | 0.24 | 0.82 | 4 | 3 v | LH | 7vLH |
| Oaxaca | San Pedro Apóstol        | 0.33 | 0.29 | 0.12 | 0.24 | 0.81 | 4 | 2 v | LH | 6vLH |
| Oaxaca | San Pedro Ocotepec       | 0.22 | 0.16 | 0.41 | 0.26 | 0.78 | 4 | 3 v | LH | 7vLH |
| Oaxaca | San Pedro Pochutla       | 0.35 | 0.30 | 0.32 | 0.32 | 0.68 | 3 | 4 d | HH | 7dHH |
| Oaxaca | San Pedro Atoyac         | 0.39 | 0.16 | 0.33 | 0.29 | 0.73 | 4 | 2 v | LH | 6vLH |
| Oaxaca | San Pedro Cajonos        | 0.28 | 0.20 | 0.47 | 0.31 | 0.70 | 3 | 3 b | LH | 6bLH |
| Oaxaca | San Pedro Comitancillo   | 0.57 | 0.34 | 0.47 | 0.46 | 0.45 | 2 | 5 d | NS | 7dNS |
| Oaxaca | San Pedro el Alto        | 0.20 | 0.16 | 0.29 | 0.22 | 0.85 | 4 | 3 v | LH | 7vLH |
| Oaxaca | San Pedro Tidaá          | 0.29 | 0.17 | 0.42 | 0.30 | 0.73 | 4 | 2 v | LH | 6vLH |
| Oaxaca | San Pedro Topiltepec     | 0.26 | 0.20 | 0.47 | 0.31 | 0.71 | 3 | 2 v | LH | 5vLH |
| Oaxaca | San Pedro Huamelula      | 0.27 | 0.29 | 0.63 | 0.39 | 0.56 | 3 | 3 b | LH | 6bLH |

|        |                                |      |      |      |      |      |   |     |    |      |
|--------|--------------------------------|------|------|------|------|------|---|-----|----|------|
| Oaxaca | San Pedro Huilotepec           | 0.58 | 0.23 | 0.41 | 0.41 | 0.54 | 3 | 5 d | NS | 8dNS |
| Oaxaca | San Pedro Ixcatlán             | 0.30 | 0.19 | 0.21 | 0.23 | 0.83 | 4 | 5 d | HH | 9dHH |
| Oaxaca | San Pedro Ixtlahuaca           | 0.38 | 0.28 | 0.27 | 0.31 | 0.71 | 4 | 2 v | NS | 6vNS |
| Oaxaca | San Pedro Jicayán              | 0.32 | 0.20 | 0.15 | 0.22 | 0.85 | 4 | 2 v | LH | 6vLH |
| Oaxaca | San Pedro Jocotipac            | 0.18 | 0.17 | 0.48 | 0.27 | 0.76 | 4 | 3 v | LH | 7vLH |
| Oaxaca | San Pedro Juchatengo           | 0.32 | 0.23 | 0.40 | 0.32 | 0.69 | 3 | 3 b | LH | 6bLH |
| Oaxaca | San Pedro Totolápan            | 0.28 | 0.28 | 0.44 | 0.33 | 0.66 | 3 | 3 b | LH | 6bLH |
| Oaxaca | Villa de Tututepec             | 0.47 | 0.25 | 0.26 | 0.33 | 0.67 | 3 | 2 v | LH | 5vLH |
| Oaxaca | San Pedro Mártir               | 0.28 | 0.20 | 0.11 | 0.20 | 0.89 | 4 | 2 v | LH | 6vLH |
| Oaxaca | San Pedro Mártir Quiechapa     | 0.27 | 0.16 | 0.43 | 0.29 | 0.74 | 4 | 2 v | LH | 6vLH |
| Oaxaca | San Pedro Mártir Yucuxaco      | 0.33 | 0.18 | 0.41 | 0.30 | 0.71 | 4 | 3 v | LH | 7vLH |
| Oaxaca | San Pedro Mixtepec             | 0.38 | 0.29 | 0.44 | 0.37 | 0.60 | 3 | 3 b | LH | 6bLH |
| Oaxaca | Santa María del Rosario        | 0.30 | 0.19 | 0.28 | 0.26 | 0.79 | 4 | 2 v | LH | 6vLH |
| Oaxaca | San Pedro Mixtepec             | 0.39 | 0.17 | 0.42 | 0.33 | 0.68 | 3 | 3 b | LH | 6bLH |
| Oaxaca | San Pedro Molinos              | 0.26 | 0.18 | 0.43 | 0.29 | 0.73 | 4 | 2 v | LH | 6vLH |
| Oaxaca | San Pedro Nopala               | 0.24 | 0.16 | 0.46 | 0.29 | 0.74 | 4 | 3 v | LH | 7vLH |
| Oaxaca | San Pedro Ocopetatillo         | 0.14 | 0.16 | 0.26 | 0.19 | 0.91 | 4 | 4 b | HH | 8bHH |
| Oaxaca | Santa María Jalapa del Marqués | 0.55 | 0.31 | 0.41 | 0.42 | 0.52 | 2 | 4 d | HH | 6dHH |
| Oaxaca | San Pedro Quiatoni             | 0.34 | 0.17 | 0.35 | 0.29 | 0.74 | 4 | 3 v | LH | 7vLH |
| Oaxaca | Santa Ana Zegache              | 0.41 | 0.20 | 0.27 | 0.30 | 0.73 | 4 | 2 v | NS | 6vNS |
| Oaxaca | San Pedro Sochiápam            | 0.27 | 0.15 | 0.38 | 0.27 | 0.77 | 4 | 4 b | HH | 8bHH |

|        |                                   |      |      |      |      |      |   |     |    |      |
|--------|-----------------------------------|------|------|------|------|------|---|-----|----|------|
| Oaxaca | San Pedro Tapanatepec             | 0.36 | 0.28 | 0.58 | 0.41 | 0.54 | 3 | 3 b | NS | 6bNS |
| Oaxaca | San Pedro Taviche                 | 0.22 | 0.15 | 0.35 | 0.24 | 0.82 | 4 | 2 v | LH | 6vLH |
| Oaxaca | San Pedro Teozacoalco             | 0.28 | 0.16 | 0.39 | 0.28 | 0.76 | 4 | 2 v | LH | 6vLH |
| Oaxaca | San Pedro Teutila                 | 0.27 | 0.17 | 0.39 | 0.28 | 0.76 | 4 | 5 d | HH | 9dHH |
| Oaxaca | San Pedro Yaneri                  | 0.30 | 0.16 | 0.26 | 0.24 | 0.82 | 4 | 4 b | NS | 8bNS |
| Oaxaca | Santa María Jaltianguis           | 0.34 | 0.23 | 0.48 | 0.35 | 0.64 | 3 | 3 b | LH | 6bLH |
| Oaxaca | San Pedro Yólox                   | 0.25 | 0.19 | 0.49 | 0.31 | 0.70 | 3 | 4 d | HH | 7dHH |
| Oaxaca | San Pedro y San Pablo Ayutla      | 0.14 | 0.20 | 0.30 | 0.21 | 0.87 | 4 | 3 v | LH | 7vLH |
| Oaxaca | Villa de Etla                     | 0.60 | 0.35 | 0.34 | 0.43 | 0.50 | 2 | 3 d | NS | 5dNS |
| Oaxaca | San Pedro y San Pablo Teposcolula | 0.38 | 0.28 | 0.39 | 0.35 | 0.64 | 3 | 3 b | LH | 6bLH |
| Oaxaca | San Pedro y San Pablo Tequixtepec | 0.28 | 0.21 | 0.33 | 0.27 | 0.77 | 4 | 3 v | LH | 7vLH |
| Oaxaca | San Pedro Yucunama                | 0.27 | 0.20 | 0.51 | 0.33 | 0.67 | 3 | 3 b | LH | 6bLH |
| Oaxaca | San Raymundo Jalpan               | 0.44 | 0.36 | 0.36 | 0.38 | 0.58 | 3 | 2 v | NS | 5vNS |
| Oaxaca | San Sebastián Abasolo             | 0.33 | 0.25 | 0.37 | 0.32 | 0.69 | 3 | 2 v | NS | 5vNS |
| Oaxaca | San Sebastián Coatlán             | 0.32 | 0.19 | 0.37 | 0.29 | 0.73 | 4 | 3 v | LH | 7vLH |
| Oaxaca | San Sebastián Nicananduta         | 0.24 | 0.20 | 0.34 | 0.26 | 0.79 | 4 | 3 v | LH | 7vLH |
| Oaxaca | San Sebastián Ixcapa              | 0.27 | 0.23 | 0.27 | 0.26 | 0.79 | 4 | 3 v | LH | 7vLH |
| Oaxaca | Santa Ana del Valle               | 0.30 | 0.22 | 0.24 | 0.25 | 0.80 | 4 | 3 v | LH | 7vLH |
| Oaxaca | Santa Ana Tavela                  | 0.27 | 0.19 | 0.43 | 0.30 | 0.73 | 4 | 3 v | LH | 7vLH |
| Oaxaca | San Sebastián Río Hondo           | 0.30 | 0.16 | 0.31 | 0.26 | 0.80 | 4 | 3 v | LH | 7vLH |
| Oaxaca | San Sebastián Tecomaxtlahuaca     | 0.20 | 0.21 | 0.35 | 0.26 | 0.79 | 4 | 2 v | LH | 6vLH |

|        |                  |      |      |      |      |      |   |     |    |      |
|--------|------------------|------|------|------|------|------|---|-----|----|------|
| Oaxaca | San Sebastián    |      |      |      |      |      |   |     |    |      |
| Oaxaca | Teitipac         | 0.31 | 0.26 | 0.21 | 0.26 | 0.78 | 4 | 2 v | NS | 6vNS |
| Oaxaca | Santa Ana Yareni | 0.20 | 0.18 | 0.46 | 0.28 | 0.75 | 4 | 3 v | LH | 7vLH |
| Oaxaca | Santa Catarina   |      |      |      |      |      |   |     |    |      |
| Oaxaca | Mechoacán        | 0.47 | 0.17 | 0.24 | 0.29 | 0.73 | 4 | 2 v | LH | 6vLH |
| Oaxaca | San Sebastián    |      |      |      |      |      |   |     |    |      |
| Oaxaca | Tutla            | 0.64 | 0.43 | 0.46 | 0.51 | 0.37 | 2 | 2 b | NS | 4bNS |
| Oaxaca | San Simón        |      |      |      |      |      |   |     |    |      |
| Oaxaca | Almolongas       | 0.22 | 0.19 | 0.36 | 0.26 | 0.79 | 4 | 3 v | LH | 7vLH |
| Oaxaca | Santa Catarina   |      |      |      |      |      |   |     |    |      |
| Oaxaca | Minas            | 0.33 | 0.24 | 0.38 | 0.31 | 0.70 | 3 | 2 v | LH | 5vLH |
| Oaxaca | San Simón        |      |      |      |      |      |   |     |    |      |
| Oaxaca | Zahuatlán        | 0.10 | 0.15 | 0.28 | 0.18 | 0.93 | 4 | 3 v | LH | 7vLH |
| Oaxaca | Santa Ana        | 0.26 | 0.19 | 0.34 | 0.26 | 0.79 | 4 | 3 v | LH | 7vLH |
| Oaxaca | Santa Ana        |      |      |      |      |      |   |     |    |      |
| Oaxaca | Ateixtlahuaca    | 0.14 | 0.17 | 0.38 | 0.23 | 0.84 | 4 | 4 b | HH | 8bHH |
| Oaxaca | Santa Ana        |      |      |      |      |      |   |     |    |      |
| Oaxaca | Cuauhtémoc       | 0.21 | 0.17 | 0.40 | 0.26 | 0.79 | 4 | 4 b | HH | 8bHH |
| Oaxaca | Santa Ana        |      |      |      |      |      |   |     |    |      |
| Oaxaca | Tlapacoyan       | 0.26 | 0.23 | 0.38 | 0.29 | 0.74 | 4 | 2 v | LH | 6vLH |
| Oaxaca | Santa Catalina   |      |      |      |      |      |   |     |    |      |
| Oaxaca | Quierí           | 0.20 | 0.15 | 0.47 | 0.28 | 0.76 | 4 | 3 v | LH | 7vLH |
| Oaxaca | Santa Catarina   |      |      |      |      |      |   |     |    |      |
| Oaxaca | Cuixtla          | 0.24 | 0.25 | 0.40 | 0.29 | 0.73 | 4 | 3 v | LH | 7vLH |
| Oaxaca | Santa Catarina   |      |      |      |      |      |   |     |    |      |
| Oaxaca | Ixtepeji         | 0.37 | 0.23 | 0.45 | 0.35 | 0.64 | 3 | 3 b | NS | 6bNS |
| Oaxaca | Santa Catarina   |      |      |      |      |      |   |     |    |      |
| Oaxaca | Juquila          | 0.36 | 0.24 | 0.31 | 0.31 | 0.71 | 4 | 2 v | LH | 6vLH |
| Oaxaca | Santa Catarina   |      |      |      |      |      |   |     |    |      |
| Oaxaca | Lachatao         | 0.43 | 0.19 | 0.48 | 0.37 | 0.61 | 3 | 3 b | NS | 6bNS |
| Oaxaca | Santa Catarina   |      |      |      |      |      |   |     |    |      |
| Oaxaca | Loxicha          | 0.37 | 0.16 | 0.26 | 0.26 | 0.78 | 4 | 3 v | LH | 7vLH |
| Oaxaca | Santa Catarina   |      |      |      |      |      |   |     |    |      |
| Oaxaca | Quiané           | 0.32 | 0.29 | 0.63 | 0.41 | 0.53 | 2 | 2 b | NS | 4bNS |
| Oaxaca | Santa Catarina   |      |      |      |      |      |   |     |    |      |
| Oaxaca | Zapoquila        | 0.26 | 0.17 | 0.29 | 0.24 | 0.82 | 4 | 3 v | LH | 7vLH |
| Oaxaca | Santa Catarina   |      |      |      |      |      |   |     |    |      |
| Oaxaca | Tayata           | 0.32 | 0.21 | 0.64 | 0.39 | 0.57 | 3 | 2 v | LH | 5vLH |

|        |                               |      |      |      |      |      |   |     |    |      |
|--------|-------------------------------|------|------|------|------|------|---|-----|----|------|
| Oaxaca | Santa Catarina<br>Ticuá       | 0.20 | 0.20 | 0.41 | 0.27 | 0.77 | 4 | 2 v | LH | 6vLH |
| Oaxaca | Santa Catarina<br>Yosonotú    | 0.17 | 0.17 | 0.21 | 0.18 | 0.92 | 4 | 2 v | LH | 6vLH |
| Oaxaca | Santa Cruz<br>Acatepec        | 0.16 | 0.17 | 0.29 | 0.21 | 0.88 | 4 | 4 b | HH | 8bHH |
| Oaxaca | Santa Cruz<br>Nundaco         | 0.26 | 0.17 | 0.31 | 0.25 | 0.81 | 4 | 2 v | LH | 6vLH |
| Oaxaca | Santa Cruz<br>Amilpas         | 0.64 | 0.35 | 0.39 | 0.46 | 0.46 | 2 | 3 d | NS | 5dNS |
| Oaxaca | Santa Cruz de<br>Bravo        | 0.19 | 0.22 | 0.41 | 0.27 | 0.77 | 4 | 3 v | LH | 7vLH |
| Oaxaca | Santa Cruz<br>Itundujia       | 0.30 | 0.19 | 0.30 | 0.26 | 0.78 | 4 | 2 v | LH | 6vLH |
| Oaxaca | Santa Cruz<br>Mixtepec        | 0.27 | 0.21 | 0.38 | 0.29 | 0.74 | 4 | 2 v | LH | 6vLH |
| Oaxaca | Santa Cruz<br>Tacache de Mina | 0.25 | 0.25 | 0.37 | 0.29 | 0.74 | 4 | 3 v | LH | 7vLH |
| Oaxaca | Santa Cruz<br>Tacahua         | 0.27 | 0.17 | 0.36 | 0.27 | 0.78 | 4 | 2 v | LH | 6vLH |
| Oaxaca | Santa Cruz Tayata             | 0.30 | 0.18 | 0.43 | 0.30 | 0.71 | 4 | 2 v | LH | 6vLH |
| Oaxaca | Santa María<br>Lachixío       | 0.25 | 0.16 | 0.42 | 0.28 | 0.76 | 4 | 2 v | LH | 6vLH |
| Oaxaca | Santa Cruz Xitla              | 0.41 | 0.17 | 0.34 | 0.30 | 0.71 | 4 | 3 v | LH | 7vLH |
| Oaxaca | Santa Cruz<br>Xoxocotlán      | 0.64 | 0.33 | 0.49 | 0.49 | 0.41 | 2 | 2 b | NS | 4bNS |
| Oaxaca | Santa Cruz<br>Zenzontepec     | 0.24 | 0.16 | 0.14 | 0.18 | 0.92 | 4 | 2 v | LH | 6vLH |
| Oaxaca | Santa Gertrudis               | 0.36 | 0.28 | 0.43 | 0.35 | 0.63 | 3 | 2 v | LH | 5vLH |
| Oaxaca | Santa María<br>Mixtequilla    | 0.49 | 0.28 | 0.45 | 0.41 | 0.54 | 3 | 5 d | NS | 8dNS |
| Oaxaca | Santa Inés del<br>Monte       | 0.31 | 0.16 | 0.14 | 0.20 | 0.88 | 4 | 2 v | LH | 6vLH |
| Oaxaca | Santa Inés<br>Yatzeche        | 0.24 | 0.18 | 0.46 | 0.29 | 0.73 | 4 | 2 v | LH | 6vLH |
| Oaxaca | Santa María<br>Nativitas      | 0.24 | 0.19 | 0.50 | 0.31 | 0.70 | 3 | 2 v | LH | 5vLH |



|        |                            |      |      |      |      |      |   |     |    |      |
|--------|----------------------------|------|------|------|------|------|---|-----|----|------|
| Oaxaca | Santa María Nduayaco       | 0.23 | 0.17 | 0.28 | 0.23 | 0.84 | 4 | 2 v | LH | 6vLH |
| Oaxaca | Santa María Ozolotepec     | 0.24 | 0.15 | 0.50 | 0.30 | 0.73 | 4 | 3 v | LH | 7vLH |
| Oaxaca | Santa Lucía del Camino     | 0.65 | 0.37 | 0.36 | 0.46 | 0.45 | 2 | 3 d | NS | 5dNS |
| Oaxaca | Santa Lucía Miahuatlán     | 0.16 | 0.15 | 0.34 | 0.22 | 0.86 | 4 | 3 v | LH | 7vLH |
| Oaxaca | Santa María Tataltepec     | 0.22 | 0.16 | 0.40 | 0.26 | 0.78 | 4 | 2 v | LH | 6vLH |
| Oaxaca | Santa Lucía Monteverde     | 0.23 | 0.16 | 0.18 | 0.19 | 0.90 | 4 | 2 v | LH | 6vLH |
| Oaxaca | Santa Lucía Ocotlán        | 0.48 | 0.17 | 0.27 | 0.31 | 0.71 | 4 | 2 v | LH | 6vLH |
| Oaxaca | Santa María Alotepec       | 0.23 | 0.17 | 0.34 | 0.25 | 0.81 | 4 | 3 v | LH | 7vLH |
| Oaxaca | Santa María Apazco         | 0.14 | 0.18 | 0.28 | 0.20 | 0.88 | 4 | 2 v | LH | 6vLH |
| Oaxaca | Santa María la Asunción    | 0.07 | 0.16 | 0.29 | 0.17 | 0.93 | 4 | 4 b | HH | 8bHH |
| Oaxaca | Heroica Ciudad de Tlaxiaco | 0.52 | 0.32 | 0.25 | 0.36 | 0.62 | 3 | 2 v | LH | 5vLH |
| Oaxaca | Ayoquezco de Aldama        | 0.45 | 0.21 | 0.40 | 0.35 | 0.63 | 3 | 2 v | LH | 5vLH |
| Oaxaca | Santa María Atzompa        | 0.67 | 0.32 | 0.29 | 0.43 | 0.51 | 2 | 3 d | NS | 5dNS |
| Oaxaca | Santa María Camotlán       | 0.32 | 0.25 | 0.38 | 0.32 | 0.69 | 3 | 4 d | NS | 7dNS |
| Oaxaca | Santa María Colotepec      | 0.44 | 0.28 | 0.28 | 0.33 | 0.66 | 3 | 3 b | LH | 6bLH |
| Oaxaca | Santa María Cortijo        | 0.26 | 0.23 | 0.44 | 0.31 | 0.70 | 3 | 3 b | LH | 6bLH |
| Oaxaca | Santa María Temaxcalapa    | 0.33 | 0.19 | 0.48 | 0.33 | 0.66 | 3 | 4 d | NS | 7dNS |
| Oaxaca | Santa María Coyotepec      | 0.40 | 0.36 | 0.40 | 0.39 | 0.58 | 3 | 2 v | NS | 5vNS |
| Oaxaca | Santa María Chachoápam     | 0.33 | 0.25 | 0.39 | 0.32 | 0.68 | 3 | 2 v | LH | 5vLH |

|        |                            |      |      |      |      |      |   |     |    |      |
|--------|----------------------------|------|------|------|------|------|---|-----|----|------|
| Oaxaca | Santa María Tepantlali     | 0.18 | 0.18 | 0.40 | 0.25 | 0.80 | 4 | 3 v | LH | 7vLH |
| Oaxaca | Santa María Texcatitlán    | 0.22 | 0.16 | 0.19 | 0.19 | 0.90 | 4 | 3 v | LH | 7vLH |
| Oaxaca | Santa María Tlahuitoltepec | 0.29 | 0.18 | 0.38 | 0.28 | 0.75 | 4 | 3 v | LH | 7vLH |
| Oaxaca | Villa de Chilapa de Díaz   | 0.29 | 0.25 | 0.38 | 0.31 | 0.71 | 4 | 3 v | LH | 7vLH |
| Oaxaca | Santa María Chilchotla     | 0.19 | 0.16 | 0.13 | 0.16 | 0.95 | 4 | 5 d | HH | 9dHH |
| Oaxaca | Santa María Chimalapa      | 0.29 | 0.19 | 0.31 | 0.26 | 0.78 | 4 | 3 v | NS | 7vNS |
| Oaxaca | Santa María del Tule       | 0.62 | 0.38 | 0.45 | 0.48 | 0.41 | 2 | 2 b | NS | 4bNS |
| Oaxaca | Santa María Ecatepec       | 0.25 | 0.18 | 0.37 | 0.27 | 0.78 | 4 | 3 v | LH | 7vLH |
| Oaxaca | Santa María Guelacé        | 0.35 | 0.28 | 0.42 | 0.35 | 0.64 | 3 | 2 v | NS | 5vNS |
| Oaxaca | Santa María Guienagati     | 0.25 | 0.18 | 0.42 | 0.28 | 0.75 | 4 | 4 b | NS | 8bNS |
| Oaxaca | Santa María Huatulco       | 0.59 | 0.33 | 0.38 | 0.43 | 0.50 | 2 | 4 d | HH | 6dHH |
| Oaxaca | Santa María Huazolotitlán  | 0.41 | 0.25 | 0.20 | 0.29 | 0.74 | 4 | 2 v | LH | 6vLH |
| Oaxaca | Santa María Ipalapa        | 0.25 | 0.20 | 0.45 | 0.30 | 0.72 | 4 | 2 v | LH | 6vLH |
| Oaxaca | Santa María Ixcatlán       | 0.27 | 0.17 | 0.32 | 0.25 | 0.80 | 4 | 2 v | LH | 6vLH |
| Oaxaca | Santa María Jacatepec      | 0.26 | 0.25 | 0.41 | 0.31 | 0.71 | 4 | 5 d | NS | 9dNS |
| Oaxaca | Santa María Pápalo         | 0.34 | 0.15 | 0.35 | 0.28 | 0.75 | 4 | 4 b | HH | 8bHH |
| Oaxaca | Santa María Peñoles        | 0.21 | 0.15 | 0.17 | 0.18 | 0.93 | 4 | 2 v | LH | 6vLH |
| Oaxaca | Santa María Petapa         | 0.42 | 0.29 | 0.34 | 0.35 | 0.64 | 3 | 4 d | NS | 7dNS |
| Oaxaca | Santa María Quiegolani     | 0.22 | 0.16 | 0.44 | 0.27 | 0.77 | 4 | 3 v | LH | 7vLH |

|        |                              |      |      |      |      |      |   |     |    |      |
|--------|------------------------------|------|------|------|------|------|---|-----|----|------|
| Oaxaca | Santa María Sola             | 0.26 | 0.16 | 0.31 | 0.25 | 0.81 | 4 | 2 v | LH | 6vLH |
| Oaxaca | Santa María<br>Tecomavaca    | 0.31 | 0.25 | 0.43 | 0.33 | 0.67 | 3 | 3 b | LH | 6bLH |
| Oaxaca | Santa María<br>Temaxcaltepec | 0.15 | 0.17 | 0.27 | 0.20 | 0.89 | 4 | 3 v | LH | 7vLH |
| Oaxaca | Santa María Yalina           | 0.28 | 0.20 | 0.52 | 0.33 | 0.66 | 3 | 3 b | LH | 6bLH |
| Oaxaca | Santa María<br>Teopoxco      | 0.21 | 0.16 | 0.58 | 0.32 | 0.69 | 3 | 3 b | LH | 6bLH |
| Oaxaca | Santa María<br>Tlaxiactac    | 0.24 | 0.17 | 0.42 | 0.28 | 0.76 | 4 | 4 b | HH | 8bHH |
| Oaxaca | Santa María<br>Tonameca      | 0.30 | 0.25 | 0.24 | 0.26 | 0.78 | 4 | 4 b | HH | 8bHH |
| Oaxaca | Santa María<br>Totolapilla   | 0.22 | 0.19 | 0.47 | 0.29 | 0.73 | 4 | 3 v | LH | 7vLH |
| Oaxaca | Santa María<br>Xadani        | 0.41 | 0.20 | 0.44 | 0.35 | 0.64 | 3 | 5 d | NS | 8dNS |
| Oaxaca | Santiago Apoala              | 0.13 | 0.16 | 0.22 | 0.17 | 0.94 | 4 | 2 v | LH | 6vLH |
| Oaxaca | Santa María<br>Yavesía       | 0.32 | 0.21 | 0.51 | 0.35 | 0.64 | 3 | 3 b | LH | 6bLH |
| Oaxaca | Santiago<br>Cacaloxtepec     | 0.27 | 0.25 | 0.40 | 0.30 | 0.71 | 4 | 4 b | HH | 8bHH |
| Oaxaca | Santiago Camotlán            | 0.27 | 0.15 | 0.43 | 0.28 | 0.75 | 4 | 4 b | NS | 8bNS |
| Oaxaca | Santa María<br>Yolotepec     | 0.32 | 0.16 | 0.33 | 0.27 | 0.77 | 4 | 2 v | LH | 6vLH |
| Oaxaca | Santa María<br>Yosoyúa       | 0.28 | 0.16 | 0.45 | 0.29 | 0.73 | 4 | 2 v | LH | 6vLH |
| Oaxaca | Santa María<br>Yucuhiti      | 0.34 | 0.17 | 0.41 | 0.30 | 0.72 | 4 | 2 v | LH | 6vLH |
| Oaxaca | Santa María<br>Zacatepec     | 0.36 | 0.22 | 0.46 | 0.35 | 0.64 | 3 | 2 v | LH | 5vLH |
| Oaxaca | Santa María<br>Zaniza        | 0.19 | 0.15 | 0.39 | 0.24 | 0.82 | 4 | 2 v | LH | 6vLH |
| Oaxaca | Santa María<br>Zoquitlán     | 0.26 | 0.18 | 0.32 | 0.26 | 0.80 | 4 | 2 v | LH | 6vLH |
| Oaxaca | Santiago<br>Amoltepec        | 0.18 | 0.15 | 0.14 | 0.16 | 0.96 | 4 | 2 v | LH | 6vLH |
| Oaxaca | Santiago Apóstol             | 0.47 | 0.18 | 0.40 | 0.35 | 0.64 | 3 | 2 v | LH | 5vLH |

|        |                            |      |      |      |      |      |   |     |    |      |
|--------|----------------------------|------|------|------|------|------|---|-----|----|------|
| Oaxaca | Santiago Huajolotitlán     | 0.37 | 0.29 | 0.33 | 0.33 | 0.67 | 3 | 4 d | HH | 7dHH |
| Oaxaca | Santiago Astata            | 0.28 | 0.29 | 0.38 | 0.32 | 0.69 | 3 | 3 b | LH | 6bLH |
| Oaxaca | Santiago Lalopa            | 0.36 | 0.18 | 0.49 | 0.34 | 0.65 | 3 | 4 d | NS | 7dNS |
| Oaxaca | Santiago Atitlán           | 0.20 | 0.16 | 0.42 | 0.26 | 0.79 | 4 | 3 v | LH | 7vLH |
| Oaxaca | Santiago Ayuquillilla      | 0.23 | 0.18 | 0.24 | 0.22 | 0.86 | 4 | 3 v | LH | 7vLH |
| Oaxaca | Santiago Comaltepec        | 0.31 | 0.19 | 0.47 | 0.32 | 0.68 | 3 | 4 d | HH | 7dHH |
| Oaxaca | Villa de Santiago Chazumba | 0.29 | 0.23 | 0.31 | 0.28 | 0.76 | 4 | 3 v | LH | 7vLH |
| Oaxaca | Santiago Choápam           | 0.24 | 0.16 | 0.34 | 0.25 | 0.80 | 4 | 4 b | HH | 8bHH |
| Oaxaca | Santiago del Río           | 0.18 | 0.18 | 0.35 | 0.23 | 0.83 | 4 | 3 v | LH | 7vLH |
| Oaxaca | Santiago Huaucilla         | 0.31 | 0.18 | 0.39 | 0.29 | 0.73 | 4 | 3 v | LH | 7vLH |
| Oaxaca | Santiago Ihuatlán          |      |      |      |      |      |   |     |    |      |
| Oaxaca | Plumas                     | 0.23 | 0.20 | 0.37 | 0.27 | 0.77 | 4 | 3 v | LH | 7vLH |
| Oaxaca | Santiago Ixcuintepec       | 0.21 | 0.16 | 0.50 | 0.29 | 0.73 | 4 | 3 v | LH | 7vLH |
| Oaxaca | Santiago Ixtayutla         | 0.13 | 0.16 | 0.27 | 0.19 | 0.91 | 4 | 2 v | LH | 6vLH |
| Oaxaca | Santiago Jamiltepec        | 0.41 | 0.24 | 0.25 | 0.30 | 0.71 | 4 | 2 v | LH | 6vLH |
| Oaxaca | Santiago Jocotepec         | 0.20 | 0.19 | 0.32 | 0.24 | 0.83 | 4 | 4 b | HH | 8bHH |
| Oaxaca | Santiago Juxtlahuaca       | 0.41 | 0.23 | 0.37 | 0.34 | 0.66 | 3 | 2 v | LH | 5vLH |
| Oaxaca | Santiago Lachiguirí        | 0.25 | 0.18 | 0.38 | 0.27 | 0.77 | 4 | 3 v | LH | 7vLH |
| Oaxaca | Santiago Laollaga          | 0.37 | 0.30 | 0.48 | 0.38 | 0.58 | 3 | 5 d | NS | 8dNS |
| Oaxaca | Santiago Laxopa            | 0.28 | 0.17 | 0.45 | 0.30 | 0.72 | 4 | 3 v | LH | 7vLH |
| Oaxaca | Santiago Llano Grande      | 0.24 | 0.26 | 0.41 | 0.31 | 0.71 | 4 | 3 v | LH | 7vLH |
| Oaxaca | Santo Domingo Ixcatlán     | 0.28 | 0.17 | 0.24 | 0.23 | 0.84 | 4 | 2 v | LH | 6vLH |
| Oaxaca | Santo Domingo Nuxaá        | 0.25 | 0.15 | 0.20 | 0.20 | 0.89 | 4 | 2 v | LH | 6vLH |
| Oaxaca | Santiago Matatlán          | 0.40 | 0.21 | 0.28 | 0.30 | 0.73 | 4 | 2 v | LH | 6vLH |

|        |                           |      |      |      |      |      |   |     |    |      |
|--------|---------------------------|------|------|------|------|------|---|-----|----|------|
| Oaxaca | Santiago Nacaltepec       | 0.24 | 0.18 | 0.34 | 0.25 | 0.80 | 4 | 3 v | LH | 7vLH |
| Oaxaca | Santiago Miltepec         | 0.27 | 0.21 | 0.45 | 0.31 | 0.70 | 3 | 3 b | LH | 6bLH |
| Oaxaca | Santiago Minas            | 0.25 | 0.17 | 0.18 | 0.20 | 0.89 | 4 | 2 v | LH | 6vLH |
| Oaxaca | Santiago Nejapilla        | 0.26 | 0.16 | 0.41 | 0.28 | 0.76 | 4 | 2 v | LH | 6vLH |
| Oaxaca | Santiago Suchilquitongo   | 0.53 | 0.25 | 0.29 | 0.36 | 0.63 | 3 | 3 b | LH | 6bLH |
| Oaxaca | Santiago Tamazola         | 0.22 | 0.21 | 0.23 | 0.22 | 0.86 | 4 | 3 v | LH | 7vLH |
| Oaxaca | Santiago Tapextla         | 0.15 | 0.19 | 0.35 | 0.23 | 0.84 | 4 | 2 v | LH | 6vLH |
| Oaxaca | Villa Tejúpam de la Unión | 0.36 | 0.24 | 0.36 | 0.32 | 0.69 | 3 | 3 b | LH | 6bLH |
| Oaxaca | Santiago Tenango          | 0.32 | 0.21 | 0.32 | 0.29 | 0.74 | 4 | 3 v | LH | 7vLH |
| Oaxaca | Santiago Tepetlapa        | 0.25 | 0.18 | 0.45 | 0.30 | 0.73 | 4 | 2 v | LH | 6vLH |
| Oaxaca | Santo Domingo Roayaga     | 0.20 | 0.16 | 0.46 | 0.28 | 0.76 | 4 | 4 b | HH | 8bHH |
| Oaxaca | Santo Domingo Tehuantepec | 0.52 | 0.31 | 0.42 | 0.42 | 0.52 | 2 | 4 d | NS | 6dNS |
| Oaxaca | Santo Domingo Teojomulco  | 0.25 | 0.18 | 0.42 | 0.28 | 0.75 | 4 | 2 v | LH | 6vLH |
| Oaxaca | Santo Domingo Tepuxtepec  | 0.17 | 0.16 | 0.44 | 0.26 | 0.79 | 4 | 3 v | LH | 7vLH |
| Oaxaca | Santiago Tetepec          | 0.25 | 0.19 | 0.29 | 0.24 | 0.82 | 4 | 2 v | LH | 6vLH |
| Oaxaca | Santiago Texcalcingo      | 0.21 | 0.15 | 0.30 | 0.22 | 0.85 | 4 | 3 v | LH | 7vLH |
| Oaxaca | Santiago Textitlán        | 0.30 | 0.16 | 0.45 | 0.30 | 0.72 | 4 | 2 v | LH | 6vLH |
| Oaxaca | Santiago Tilantongo       | 0.21 | 0.16 | 0.23 | 0.20 | 0.88 | 4 | 2 v | LH | 6vLH |
| Oaxaca | Santiago Tlazoyaltepec    | 0.18 | 0.15 | 0.28 | 0.20 | 0.88 | 4 | 2 v | LH | 6vLH |
| Oaxaca | Santiago Xanica           | 0.20 | 0.17 | 0.26 | 0.21 | 0.87 | 4 | 3 v | LH | 7vLH |
| Oaxaca | Santiago Xiacuí           | 0.34 | 0.26 | 0.48 | 0.36 | 0.62 | 3 | 4 d | HH | 7dHH |
| Oaxaca | Santiago Yolomécatl       | 0.32 | 0.29 | 0.38 | 0.33 | 0.67 | 3 | 3 b | LH | 6bLH |
| Oaxaca | Santiago Yosondúa         | 0.28 | 0.18 | 0.29 | 0.25 | 0.80 | 4 | 2 v | LH | 6vLH |

|        |                          |      |      |      |      |      |   |     |    |      |
|--------|--------------------------|------|------|------|------|------|---|-----|----|------|
| Oaxaca | Nuevo Zoquiápam          | 0.30 | 0.20 | 0.49 | 0.33 | 0.67 | 3 | 3 b | NS | 6bNS |
| Oaxaca | Santiago Yucuyachi       | 0.14 | 0.22 | 0.35 | 0.24 | 0.83 | 4 | 3 v | LH | 7vLH |
| Oaxaca | Santo Domingo Ingenio    | 0.45 | 0.28 | 0.42 | 0.38 | 0.59 | 3 | 4 d | NS | 7dNS |
| Oaxaca | Santo Domingo Albarradas | 0.23 | 0.20 | 0.45 | 0.29 | 0.73 | 4 | 3 v | LH | 7vLH |
| Oaxaca | Santo Domingo Armenta    | 0.33 | 0.19 | 0.37 | 0.30 | 0.73 | 4 | 2 v | LH | 6vLH |
| Oaxaca | Santo Domingo Ozolotepec | 0.19 | 0.15 | 0.50 | 0.28 | 0.75 | 4 | 3 v | LH | 7vLH |
| Oaxaca | Santo Domingo Petapa     | 0.40 | 0.20 | 0.49 | 0.36 | 0.61 | 3 | 4 d | HH | 7dHH |
| Oaxaca | Santo Domingo Tlatayápam | 0.22 | 0.20 | 0.47 | 0.29 | 0.73 | 4 | 2 v | LH | 6vLH |
| Oaxaca | Santo Domingo Tomaltepec | 0.42 | 0.29 | 0.33 | 0.35 | 0.64 | 3 | 3 b | NS | 6bNS |
| Oaxaca | Santo Domingo Tonalá     | 0.29 | 0.27 | 0.35 | 0.30 | 0.71 | 4 | 3 v | LH | 7vLH |
| Oaxaca | Santo Domingo Xagacia    | 0.23 | 0.17 | 0.45 | 0.28 | 0.75 | 4 | 3 v | LH | 7vLH |
| Oaxaca | Santo Domingo Yanhuítlán | 0.32 | 0.26 | 0.39 | 0.32 | 0.68 | 3 | 2 v | LH | 5vLH |
| Oaxaca | Santo Domingo Yodohino   | 0.25 | 0.17 | 0.41 | 0.28 | 0.76 | 4 | 3 v | LH | 7vLH |
| Oaxaca | Santo Domingo Zanatepec  | 0.40 | 0.26 | 0.41 | 0.36 | 0.62 | 3 | 3 b | NS | 6bNS |
| Oaxaca | Santos Reyes Nopala      | 0.43 | 0.23 | 0.38 | 0.34 | 0.65 | 3 | 3 b | LH | 6bLH |
| Oaxaca | San Vicente Lachixío     | 0.23 | 0.15 | 0.40 | 0.26 | 0.78 | 4 | 2 v | LH | 6vLH |
| Oaxaca | Santos Reyes Pápalo      | 0.22 | 0.15 | 0.42 | 0.26 | 0.78 | 4 | 4 b | HH | 8bHH |
| Oaxaca | Santos Reyes Tepejillo   | 0.15 | 0.23 | 0.40 | 0.26 | 0.79 | 4 | 3 v | LH | 7vLH |
| Oaxaca | Santos Reyes Yucuná      | 0.17 | 0.16 | 0.18 | 0.17 | 0.94 | 4 | 3 v | LH | 7vLH |
| Oaxaca | San Vicente Nuñú         | 0.28 | 0.21 | 0.35 | 0.28 | 0.75 | 4 | 2 v | LH | 6vLH |

|        |                     |      |      |      |      |      |   |     |    |      |
|--------|---------------------|------|------|------|------|------|---|-----|----|------|
| Oaxaca | Silacayoápam        | 0.25 | 0.24 | 0.34 | 0.27 | 0.77 | 4 | 3 v | LH | 7vLH |
| Oaxaca | Santo Tomás         |      |      |      |      |      |   |     |    |      |
| Oaxaca | Jalieza             | 0.36 | 0.21 | 0.21 | 0.26 | 0.79 | 4 | 2 v | LH | 6vLH |
| Oaxaca | Santo Tomás         |      |      |      |      |      |   |     |    |      |
| Oaxaca | Mazaltepec          | 0.35 | 0.24 | 0.47 | 0.35 | 0.63 | 3 | 3 b | NS | 6bNS |
| Oaxaca | Santo Tomás         |      |      |      |      |      |   |     |    |      |
| Oaxaca | Ocotepec            | 0.22 | 0.16 | 0.30 | 0.23 | 0.84 | 4 | 2 v | LH | 6vLH |
| Oaxaca | Santo Tomás         |      |      |      |      |      |   |     |    |      |
| Oaxaca | Tamazulapan         | 0.26 | 0.25 | 0.50 | 0.33 | 0.67 | 3 | 3 b | LH | 6bLH |
| Oaxaca | San Vicente         |      |      |      |      |      |   |     |    |      |
| Oaxaca | Coatlán             | 0.39 | 0.16 | 0.49 | 0.34 | 0.65 | 3 | 3 b | LH | 6bLH |
| Oaxaca | Tanetze de          |      |      |      |      |      |   |     |    |      |
| Oaxaca | Zaragoza            | 0.33 | 0.18 | 0.50 | 0.34 | 0.66 | 3 | 4 d | HH | 7dHH |
| Oaxaca | Sitio de Xitlapehua | 0.23 | 0.18 | 0.25 | 0.22 | 0.85 | 4 | 3 v | LH | 7vLH |
| Oaxaca | Teococuilco de      |      |      |      |      |      |   |     |    |      |
| Oaxaca | Marcos Pérez        | 0.27 | 0.22 | 0.47 | 0.32 | 0.69 | 3 | 3 b | LH | 6bLH |
| Oaxaca | Soledad Etla        | 0.54 | 0.30 | 0.40 | 0.41 | 0.53 | 2 | 3 d | NS | 5dNS |
| Oaxaca | Villa de            |      |      |      |      |      |   |     |    |      |
| Oaxaca | Tamazulápam del     |      |      |      |      |      |   |     |    |      |
| Oaxaca | Progreso            | 0.58 | 0.29 | 0.40 | 0.42 | 0.52 | 2 | 3 d | LH | 5dLH |
| Oaxaca | Taniche             | 0.26 | 0.20 | 0.39 | 0.28 | 0.75 | 4 | 2 v | LH | 6vLH |
| Oaxaca | Tataltepec de       |      |      |      |      |      |   |     |    |      |
| Oaxaca | Valdés              | 0.28 | 0.17 | 0.46 | 0.30 | 0.71 | 4 | 2 v | LH | 6vLH |
| Oaxaca | Teotitlán de Flores |      |      |      |      |      |   |     |    |      |
| Oaxaca | Magón               | 0.53 | 0.28 | 0.48 | 0.43 | 0.50 | 2 | 2 b | NS | 4bNS |
| Oaxaca | Teotitlán del Valle | 0.55 | 0.22 | 0.43 | 0.40 | 0.55 | 3 | 3 b | NS | 6bNS |
| Oaxaca | Teotongo            | 0.26 | 0.21 | 0.39 | 0.29 | 0.74 | 4 | 3 v | LH | 7vLH |
| Oaxaca | Tepelmeme Villa     |      |      |      |      |      |   |     |    |      |
| Oaxaca | de Morelos          | 0.29 | 0.22 | 0.33 | 0.28 | 0.75 | 4 | 2 v | LH | 6vLH |
| Oaxaca | Heroica Villa       |      |      |      |      |      |   |     |    |      |
| Oaxaca | Tezoatlán de        |      |      |      |      |      |   |     |    |      |
| Oaxaca | Segura y Luna,      |      |      |      |      |      |   |     |    |      |
| Oaxaca | Cuna de la          |      |      |      |      |      |   |     |    |      |
| Oaxaca | Independencia de    |      |      |      |      |      |   |     |    |      |
| Oaxaca | Oaxaca              | 0.28 | 0.25 | 0.37 | 0.30 | 0.72 | 4 | 3 v | LH | 7vLH |
| Oaxaca | San Jerónimo        |      |      |      |      |      |   |     |    |      |
| Oaxaca | Tlacoahuaya         | 0.43 | 0.27 | 0.38 | 0.36 | 0.62 | 3 | 3 b | NS | 6bNS |

|        |                             |      |      |      |      |      |   |     |    |      |
|--------|-----------------------------|------|------|------|------|------|---|-----|----|------|
| Oaxaca | Santa Inés de Zaragoza      | 0.23 | 0.17 | 0.23 | 0.21 | 0.87 | 4 | 2 v | LH | 6vLH |
| Oaxaca | Zimatlán de Álvarez         | 0.49 | 0.28 | 0.39 | 0.39 | 0.57 | 3 | 2 v | LH | 5vLH |
| Oaxaca | Tlacolula de Matamoros      | 0.57 | 0.34 | 0.42 | 0.44 | 0.48 | 2 | 2 b | LH | 4bLH |
| Oaxaca | Tlacotepec Plumas           | 0.25 | 0.18 | 0.50 | 0.31 | 0.70 | 3 | 3 b | LH | 6bLH |
| Oaxaca | Tlaxiactac de Cabrera       | 0.60 | 0.30 | 0.41 | 0.44 | 0.49 | 2 | 3 d | NS | 5dNS |
| Oaxaca | Totontepec Villa de Morelos | 0.22 | 0.17 | 0.44 | 0.28 | 0.75 | 4 | 3 v | LH | 7vLH |
| Oaxaca | Trinidad Zaachila           | 0.34 | 0.24 | 0.24 | 0.27 | 0.77 | 4 | 2 v | NS | 6vNS |
| Oaxaca | La Trinidad Vista Hermosa   | 0.28 | 0.20 | 0.39 | 0.29 | 0.73 | 4 | 3 v | LH | 7vLH |
| Oaxaca | Valerio Trujano             | 0.27 | 0.24 | 0.43 | 0.31 | 0.70 | 3 | 3 b | LH | 6bLH |
| Oaxaca | San Juan Bautista           |      |      |      |      |      |   |     |    |      |
| Oaxaca | Valle Nacional              | 0.37 | 0.22 | 0.33 | 0.31 | 0.71 | 4 | 4 b | HH | 8bHH |
| Oaxaca | Villa Díaz Ordaz            | 0.48 | 0.18 | 0.41 | 0.36 | 0.63 | 3 | 3 b | LH | 6bLH |
| Oaxaca | Unión Hidalgo               | 0.49 | 0.32 | 0.53 | 0.45 | 0.48 | 2 | 5 d | NS | 7dNS |
| Oaxaca | Yogana                      | 0.15 | 0.18 | 0.29 | 0.21 | 0.87 | 4 | 3 v | LH | 7vLH |
| Oaxaca | Yutanduchi de Guerrero      | 0.20 | 0.16 | 0.38 | 0.25 | 0.81 | 4 | 2 v | LH | 6vLH |
| Oaxaca | Villa de Zaachila           | 0.57 | 0.27 | 0.29 | 0.38 | 0.59 | 3 | 2 v | NS | 5vNS |
| Oaxaca | San Mateo                   |      |      |      |      |      |   |     |    |      |
| Oaxaca | Yucutindoo                  | 0.23 | 0.17 | 0.24 | 0.21 | 0.86 | 4 | 2 v | LH | 6vLH |
| Oaxaca | Zapotitlán Lagunas          | 0.22 | 0.19 | 0.24 | 0.22 | 0.86 | 4 | 3 v | LH | 7vLH |
| Puebla | Acajete                     | 0.60 | 0.31 | 0.30 | 0.40 | 0.55 | 3 | 3 b | NS | 6bNS |
| Puebla | Acateno                     | 0.47 | 0.32 | 0.36 | 0.38 | 0.58 | 3 | 4 d | NS | 7dNS |
| Puebla | Acatlán                     | 0.54 | 0.33 | 0.30 | 0.39 | 0.57 | 3 | 3 b | NS | 6bNS |
| Puebla | Acatzingo                   | 0.64 | 0.30 | 0.38 | 0.44 | 0.48 | 2 | 2 b | NS | 4bNS |
| Puebla | Acteopan                    | 0.34 | 0.28 | 0.17 | 0.26 | 0.78 | 4 | 2 v | NS | 6vNS |
| Puebla | Ahuacatlán                  | 0.37 | 0.29 | 0.42 | 0.36 | 0.62 | 3 | 4 d | NS | 7dNS |
| Puebla | Ahuatlán                    | 0.34 | 0.27 | 0.30 | 0.30 | 0.72 | 4 | 3 v | NS | 7vNS |
| Puebla | Ahuazotepec                 | 0.41 | 0.36 | 0.45 | 0.41 | 0.54 | 3 | 3 b | NS | 6bNS |
| Puebla | Ahuehuetitla                | 0.36 | 0.33 | 0.28 | 0.33 | 0.68 | 3 | 4 d | NS | 7dNS |



|        |                      |      |      |      |      |      |   |     |    |      |
|--------|----------------------|------|------|------|------|------|---|-----|----|------|
| Puebla | Ajalpan              | 0.51 | 0.30 | 0.40 | 0.40 | 0.55 | 3 | 2 v | NS | 5vNS |
| Puebla | Albino Zertuche      | 0.40 | 0.28 | 0.34 | 0.34 | 0.65 | 3 | 3 b | LH | 6bLH |
| Puebla | Aljojuca             | 0.55 | 0.29 | 0.40 | 0.41 | 0.53 | 2 | 2 b | NS | 4bNS |
| Puebla | Altepexi             | 0.65 | 0.32 | 0.78 | 0.58 | 0.25 | 1 | 2 d | NS | 3dNS |
| Puebla | Amixtlán             | 0.43 | 0.27 | 0.44 | 0.38 | 0.59 | 3 | 4 d | NS | 7dNS |
| Puebla | Amozoc               | 0.73 | 0.37 | 0.30 | 0.47 | 0.44 | 2 | 4 d | NS | 6dNS |
| Puebla | Aquixtla             | 0.44 | 0.33 | 0.40 | 0.39 | 0.57 | 3 | 2 v | NS | 5vNS |
| Puebla | Atempan              | 0.53 | 0.29 | 0.47 | 0.43 | 0.50 | 2 | 4 d | HL | 6dHL |
| Puebla | Atexcal              | 0.37 | 0.31 | 0.37 | 0.35 | 0.64 | 3 | 2 v | NS | 5vNS |
| Puebla | Atlixco              | 0.69 | 0.38 | 0.51 | 0.53 | 0.34 | 1 | 3 d | NS | 4dNS |
| Puebla | Atoyatempan          | 0.65 | 0.26 | 0.53 | 0.48 | 0.42 | 2 | 4 d | NS | 6dNS |
| Puebla | Atzala               | 0.38 | 0.37 | 0.65 | 0.47 | 0.44 | 2 | 3 d | NS | 5dNS |
| Puebla | Atzitzihuacán        | 0.49 | 0.28 | 0.43 | 0.40 | 0.55 | 3 | 2 v | NS | 5vNS |
| Puebla | Atzitzintla          | 0.46 | 0.25 | 0.47 | 0.39 | 0.56 | 3 | 2 v | NS | 5vNS |
| Puebla | Axutla               | 0.30 | 0.34 | 0.30 | 0.31 | 0.70 | 3 | 4 d | NS | 7dNS |
| Puebla | Ayotoxco de Guerrero | 0.53 | 0.31 | 0.43 | 0.42 | 0.51 | 2 | 4 d | NS | 6dNS |
| Puebla | Calpan               | 0.62 | 0.30 | 0.38 | 0.43 | 0.50 | 2 | 3 d | NS | 5dNS |
| Puebla | Caltepec             | 0.41 | 0.28 | 0.39 | 0.36 | 0.62 | 3 | 2 v | NS | 5vNS |
| Puebla | Chignahuapan         | 0.51 | 0.33 | 0.44 | 0.43 | 0.50 | 2 | 3 d | NS | 5dNS |
| Puebla | Camocuautla          | 0.30 | 0.25 | 0.45 | 0.33 | 0.66 | 3 | 4 d | NS | 7dNS |
| Puebla | Caxhuacan            | 0.56 | 0.28 | 0.42 | 0.42 | 0.51 | 2 | 4 d | NS | 6dNS |
| Puebla | Chignautla           | 0.57 | 0.32 | 0.53 | 0.47 | 0.43 | 2 | 4 d | NS | 6dNS |
| Puebla | Chila                | 0.38 | 0.29 | 0.31 | 0.33 | 0.68 | 3 | 3 b | LH | 6bLH |
| Puebla | Chila de la Sal      | 0.36 | 0.30 | 0.35 | 0.34 | 0.66 | 3 | 3 b | NS | 6bNS |
| Puebla | Honey                | 0.39 | 0.29 | 0.50 | 0.39 | 0.57 | 3 | 3 b | NS | 6bNS |
| Puebla | Chilchotla           | 0.41 | 0.25 | 0.51 | 0.39 | 0.57 | 3 | 2 v | NS | 5vNS |
| Puebla | Chinantla            | 0.34 | 0.35 | 0.31 | 0.33 | 0.67 | 3 | 4 d | NS | 7dNS |
| Puebla | Coatepec             | 0.28 | 0.27 | 0.53 | 0.36 | 0.62 | 3 | 4 d | NS | 7dNS |
| Puebla | Coatzingo            | 0.40 | 0.30 | 0.58 | 0.43 | 0.51 | 2 | 3 d | LH | 5dLH |
| Puebla | Cohetzala            | 0.33 | 0.28 | 0.25 | 0.29 | 0.74 | 4 | 3 v | LH | 7vLH |
| Puebla | Cohuecan             | 0.41 | 0.28 | 0.32 | 0.34 | 0.66 | 3 | 2 v | NS | 5vNS |
| Puebla | Domingo Arenas       | 0.65 | 0.27 | 0.41 | 0.45 | 0.48 | 2 | 3 d | NS | 5dNS |

|        |                        |      |      |      |      |      |   |     |    |      |
|--------|------------------------|------|------|------|------|------|---|-----|----|------|
| Puebla | Eloxochitlán           | 0.32 | 0.24 | 0.26 | 0.27 | 0.77 | 4 | 4 b | HH | 8bHH |
| Puebla | Coronango              | 0.66 | 0.31 | 0.10 | 0.36 | 0.62 | 3 | 3 b | LL | 6bLL |
| Puebla | Coxcatlán              | 0.53 | 0.33 | 0.43 | 0.43 | 0.50 | 2 | 2 b | NS | 4bNS |
| Puebla | Coyomeapan             | 0.39 | 0.24 | 0.32 | 0.32 | 0.69 | 3 | 4 d | HH | 7dHH |
| Puebla | Coyotepec              | 0.33 | 0.35 | 0.40 | 0.36 | 0.62 | 3 | 2 v | LH | 5vLH |
| Puebla | Epatlán                | 0.46 | 0.35 | 0.35 | 0.39 | 0.57 | 3 | 3 b | NS | 6bNS |
| Puebla | Esperanza              | 0.56 | 0.31 | 0.52 | 0.47 | 0.44 | 2 | 2 b | NS | 4bNS |
| Puebla | Cuapiaxtla de Madero   | 0.64 | 0.29 | 0.28 | 0.41 | 0.54 | 3 | 3 b | NS | 6bNS |
| Puebla | Cuautempan             | 0.39 | 0.27 | 0.37 | 0.34 | 0.65 | 3 | 3 b | NS | 6bNS |
| Puebla | Cuautinchán            | 0.46 | 0.34 | 0.43 | 0.41 | 0.54 | 3 | 5 d | NS | 8dNS |
| Puebla | Cuautlancingo          | 0.78 | 0.46 | 0.36 | 0.53 | 0.33 | 1 | 3 d | NS | 4dNS |
| Puebla | Cuayuca de Andrade     | 0.32 | 0.27 | 0.23 | 0.28 | 0.76 | 4 | 3 v | NS | 7vNS |
| Puebla | Cuetzalan del Progreso | 0.46 | 0.30 | 0.41 | 0.39 | 0.57 | 3 | 4 d | NS | 7dNS |
| Puebla | Cuyoaco                | 0.45 | 0.31 | 0.33 | 0.37 | 0.61 | 3 | 3 b | NS | 6bNS |
| Puebla | Chalchicomula de Sesma | 0.64 | 0.33 | 0.38 | 0.45 | 0.48 | 2 | 2 b | NS | 4bNS |
| Puebla | Chapulco               | 0.57 | 0.31 | 0.47 | 0.45 | 0.47 | 2 | 2 b | NS | 4bNS |
| Puebla | Chiautla               | 0.56 | 0.33 | 0.30 | 0.40 | 0.55 | 3 | 3 b | LH | 6bLH |
| Puebla | Chiautzingo            | 0.70 | 0.30 | 0.42 | 0.47 | 0.43 | 2 | 3 d | NS | 5dNS |
| Puebla | Chiconcuautla          | 0.32 | 0.26 | 0.45 | 0.34 | 0.65 | 3 | 4 d | NS | 7dNS |
| Puebla | Chichiquila            | 0.38 | 0.25 | 0.39 | 0.34 | 0.65 | 3 | 2 v | NS | 5vNS |
| Puebla | Chietla                | 0.60 | 0.36 | 0.45 | 0.47 | 0.44 | 2 | 3 d | NS | 5dNS |
| Puebla | Chigmecatitlán         | 0.31 | 0.29 | 0.39 | 0.33 | 0.67 | 3 | 3 b | NS | 6bNS |
| Puebla | Francisco Z. Mena      | 0.47 | 0.30 | 0.29 | 0.35 | 0.63 | 3 | 4 d | NS | 7dNS |
| Puebla | General Felipe         |      |      |      |      |      |   |     |    |      |
| Puebla | Ángeles                | 0.59 | 0.29 | 0.40 | 0.42 | 0.51 | 2 | 2 b | NS | 4bNS |
| Puebla | Guadalupe              | 0.34 | 0.30 | 0.33 | 0.32 | 0.68 | 3 | 3 b | NS | 6bNS |
| Puebla | Guadalupe Victoria     | 0.54 | 0.30 | 0.42 | 0.42 | 0.52 | 2 | 2 b | NS | 4bNS |
| Puebla | Hermenegildo           |      |      |      |      |      |   |     |    |      |
| Puebla | Galeana                | 0.29 | 0.27 | 0.38 | 0.31 | 0.70 | 3 | 4 d | NS | 7dNS |
| Puebla | Huaquechula            | 0.50 | 0.31 | 0.47 | 0.43 | 0.51 | 2 | 3 d | NS | 5dNS |
| Puebla | Huatlatlauca           | 0.30 | 0.28 | 0.39 | 0.32 | 0.68 | 3 | 4 d | NS | 7dNS |

|        |                       |      |      |      |      |      |   |     |    |      |
|--------|-----------------------|------|------|------|------|------|---|-----|----|------|
| Puebla | Huauclilla            | 0.70 | 0.35 | 0.44 | 0.50 | 0.39 | 2 | 4 d | NS | 6dNS |
| Puebla | Huehuetla             | 0.36 | 0.27 | 0.34 | 0.32 | 0.69 | 3 | 4 d | NS | 7dNS |
| Puebla | Huehuetlán el Chico   | 0.64 | 0.27 | 0.36 | 0.42 | 0.51 | 2 | 3 d | NS | 5dNS |
| Puebla | Huejotzingo           | 0.68 | 0.36 | 0.43 | 0.49 | 0.40 | 2 | 3 d | NS | 5dNS |
| Puebla | Hueyapan              | 0.55 | 0.28 | 0.49 | 0.44 | 0.49 | 2 | 4 d | NS | 6dNS |
| Puebla | Hueytamalco           | 0.49 | 0.32 | 0.41 | 0.41 | 0.54 | 3 | 4 d | NS | 7dNS |
| Puebla | Hueytalpan            | 0.30 | 0.26 | 0.30 | 0.28 | 0.75 | 4 | 4 b | NS | 8bNS |
| Puebla | Huitzilán de Serdán   | 0.37 | 0.27 | 0.35 | 0.33 | 0.67 | 3 | 4 d | NS | 7dNS |
| Puebla | Huitziltepec          | 0.50 | 0.31 | 0.38 | 0.40 | 0.55 | 3 | 3 b | NS | 6bNS |
| Puebla | Mixtla                | 0.42 | 0.37 | 0.39 | 0.39 | 0.56 | 3 | 4 d | NS | 7dNS |
| Puebla | Molcaxac              | 0.40 | 0.31 | 0.29 | 0.33 | 0.67 | 3 | 3 b | NS | 6bNS |
| Puebla | Cañada Morelos        | 0.49 | 0.30 | 0.48 | 0.42 | 0.51 | 2 | 2 b | NS | 4bNS |
| Puebla | Naupan                | 0.36 | 0.27 | 0.42 | 0.35 | 0.64 | 3 | 4 d | NS | 7dNS |
| Puebla | Nauzontla             | 0.39 | 0.30 | 0.45 | 0.38 | 0.58 | 3 | 4 d | NS | 7dNS |
| Puebla | Nealtican             | 0.78 | 0.29 | 0.48 | 0.52 | 0.36 | 2 | 3 d | NS | 5dNS |
| Puebla | Nicolás Bravo         | 0.54 | 0.29 | 0.46 | 0.43 | 0.50 | 2 | 2 b | NS | 4bNS |
| Puebla | Nopalucan             | 0.63 | 0.33 | 0.40 | 0.45 | 0.47 | 2 | 3 d | NS | 5dNS |
| Puebla | Ocotepic              | 0.40 | 0.33 | 0.35 | 0.36 | 0.62 | 3 | 2 v | NS | 5vNS |
| Puebla | Ocoyucan              | 0.66 | 0.31 | 0.13 | 0.37 | 0.61 | 3 | 4 d | NS | 7dNS |
| Puebla | Olintla               | 0.28 | 0.28 | 0.37 | 0.31 | 0.71 | 3 | 4 d | NS | 7dNS |
| Puebla | Oriental              | 0.63 | 0.33 | 0.39 | 0.45 | 0.47 | 2 | 2 b | NS | 4bNS |
| Puebla | Pahuatlán             | 0.45 | 0.30 | 0.44 | 0.39 | 0.56 | 3 | 4 d | NS | 7dNS |
| Puebla | Palmar de Bravo       | 0.57 | 0.29 | 0.38 | 0.41 | 0.53 | 2 | 2 b | NS | 4bNS |
| Puebla | Pantepec              | 0.40 | 0.30 | 0.39 | 0.36 | 0.62 | 3 | 4 d | NS | 7dNS |
| Puebla | Petlalingo            | 0.41 | 0.28 | 0.33 | 0.34 | 0.66 | 3 | 3 b | LH | 6bLH |
| Puebla | Piaxtla               | 0.40 | 0.33 | 0.34 | 0.36 | 0.62 | 3 | 4 d | NS | 7dNS |
| Puebla | Puebla                | 0.86 | 0.45 | 0.57 | 0.63 | 0.18 | 1 | 5 d | NS | 6dNS |
| Puebla | Quecholac             | 0.59 | 0.29 | 0.36 | 0.41 | 0.53 | 2 | 2 b | NS | 4bNS |
| Puebla | Quimixtlán            | 0.37 | 0.26 | 0.41 | 0.35 | 0.64 | 3 | 2 v | NS | 5vNS |
| Puebla | Atlequizayan          | 0.30 | 0.26 | 0.45 | 0.34 | 0.66 | 3 | 4 d | NS | 7dNS |
| Puebla | Ixcamilpa de Guerrero | 0.32 | 0.29 | 0.27 | 0.29 | 0.73 | 4 | 3 v | LH | 7vLH |

|        |                              |      |      |      |      |      |   |     |    |      |
|--------|------------------------------|------|------|------|------|------|---|-----|----|------|
| Puebla | Ixcaquixtla                  | 0.55 | 0.34 | 0.36 | 0.42 | 0.52 | 2 | 3 d | LH | 5dLH |
| Puebla | Ixtacamaxtitlán              | 0.34 | 0.30 | 0.42 | 0.35 | 0.63 | 3 | 2 v | NS | 5vNS |
| Puebla | Ixtepec                      | 0.40 | 0.25 | 0.41 | 0.36 | 0.63 | 3 | 4 d | NS | 7dNS |
| Puebla | Izúcar de Matamoros          | 0.66 | 0.35 | 0.36 | 0.45 | 0.46 | 2 | 3 d | NS | 5dNS |
| Puebla | Jalpan                       | 0.36 | 0.31 | 0.34 | 0.34 | 0.65 | 3 | 4 d | NS | 7dNS |
| Puebla | Jolalpan                     | 0.51 | 0.27 | 0.35 | 0.38 | 0.59 | 3 | 2 v | NS | 5vNS |
| Puebla | Jonotla                      | 0.36 | 0.29 | 0.46 | 0.37 | 0.60 | 3 | 4 d | NS | 7dNS |
| Puebla | Jopala                       | 0.37 | 0.28 | 0.41 | 0.35 | 0.63 | 3 | 4 d | NS | 7dNS |
| Puebla | San Pedro Cholula            | 0.82 | 0.41 | 0.38 | 0.54 | 0.32 | 1 | 3 d | NS | 4dNS |
| Puebla | San Pedro Yeloixtlahuaca     | 0.38 | 0.33 | 0.26 | 0.33 | 0.68 | 3 | 3 b | LH | 6bLH |
| Puebla | Juan C. Bonilla              | 0.67 | 0.33 | 0.14 | 0.38 | 0.59 | 3 | 3 b | NS | 6bNS |
| Puebla | San Salvador el Seco         | 0.59 | 0.30 | 0.40 | 0.43 | 0.50 | 2 | 2 b | NS | 4bNS |
| Puebla | San Salvador el Verde        | 0.63 | 0.33 | 0.40 | 0.45 | 0.47 | 2 | 3 d | NS | 5dNS |
| Puebla | Juan Galindo                 | 0.66 | 0.38 | 0.62 | 0.55 | 0.30 | 1 | 4 d | NS | 5dNS |
| Puebla | Juan N. Méndez               | 0.34 | 0.27 | 0.29 | 0.30 | 0.72 | 4 | 2 v | NS | 6vNS |
| Puebla | Lafragua                     | 0.38 | 0.28 | 0.38 | 0.35 | 0.64 | 3 | 2 v | NS | 5vNS |
| Puebla | Libres                       | 0.60 | 0.32 | 0.67 | 0.53 | 0.34 | 1 | 2 d | NS | 3dNS |
| Puebla | Xicotlán                     | 0.37 | 0.26 | 0.28 | 0.30 | 0.72 | 4 | 3 v | LH | 7vLH |
| Puebla | Xiutetelco                   | 0.48 | 0.30 | 0.45 | 0.41 | 0.54 | 3 | 4 d | HL | 7dHL |
| Puebla | La Magdalena Tlatlauquitepec | 0.50 | 0.28 | 0.39 | 0.39 | 0.57 | 3 | 4 d | NS | 7dNS |
| Puebla | Mazapiltepec de Juárez       | 0.43 | 0.33 | 0.41 | 0.39 | 0.57 | 3 | 2 v | NS | 5vNS |
| Puebla | Xochiapulco                  | 0.43 | 0.30 | 0.42 | 0.38 | 0.59 | 3 | 3 b | NS | 6bNS |
| Puebla | Xochiltepec                  | 0.39 | 0.31 | 0.47 | 0.39 | 0.57 | 3 | 3 b | NS | 6bNS |
| Puebla | Xochitlán de Vicente Suárez  | 0.42 | 0.29 | 0.68 | 0.46 | 0.45 | 2 | 4 d | NS | 6dNS |
| Puebla | Xochitlán Todos Santos       | 0.53 | 0.27 | 0.42 | 0.41 | 0.54 | 3 | 3 b | NS | 6bNS |
| Puebla | Yaonáhuac                    | 0.62 | 0.33 | 0.49 | 0.48 | 0.42 | 2 | 4 d | NS | 6dNS |
| Puebla | Yehualtepec                  | 0.58 | 0.29 | 0.51 | 0.46 | 0.45 | 2 | 2 b | NS | 4bNS |

|        |                    |      |      |      |      |      |   |     |    |      |
|--------|--------------------|------|------|------|------|------|---|-----|----|------|
| Puebla | Zacapala           | 0.35 | 0.30 | 0.34 | 0.33 | 0.67 | 3 | 3 b | NS | 6bNS |
| Puebla | Zacapoaxtla        | 0.50 | 0.32 | 0.44 | 0.42 | 0.52 | 2 | 3 d | NS | 5dNS |
| Puebla | Zacatlán           | 0.57 | 0.33 | 0.46 | 0.46 | 0.46 | 2 | 3 d | NS | 5dNS |
| Puebla | Zapotitlán         | 0.50 | 0.31 | 0.65 | 0.49 | 0.41 | 2 | 2 b | NS | 4bNS |
| Puebla | Rafael Lara        |      |      |      |      |      |   |     |    |      |
| Puebla | Grajales           | 0.65 | 0.37 | 0.48 | 0.50 | 0.39 | 2 | 3 d | NS | 5dNS |
| Puebla | Zapotitlán de      |      |      |      |      |      |   |     |    |      |
| Puebla | Méndez             | 0.44 | 0.30 | 0.60 | 0.45 | 0.48 | 2 | 4 d | NS | 6dNS |
| Puebla | Zaragoza           | 0.64 | 0.37 | 0.51 | 0.51 | 0.38 | 2 | 3 d | NS | 5dNS |
| Puebla | Zautla             | 0.44 | 0.30 | 0.66 | 0.47 | 0.44 | 2 | 3 d | NS | 5dNS |
| Puebla | Zihuateutla        | 0.37 | 0.31 | 0.41 | 0.36 | 0.62 | 3 | 5 d | NS | 8dNS |
| Puebla | Los Reyes de       |      |      |      |      |      |   |     |    |      |
| Puebla | Juárez             | 0.69 | 0.28 | 0.37 | 0.45 | 0.47 | 2 | 3 d | NS | 5dNS |
| Puebla | San Andrés         |      |      |      |      |      |   |     |    |      |
| Puebla | Cholula            | 0.75 | 0.39 | 0.23 | 0.46 | 0.46 | 2 | 4 d | NS | 6dNS |
| Puebla | San Antonio        |      |      |      |      |      |   |     |    |      |
| Puebla | Cañada             | 0.36 | 0.29 | 0.48 | 0.38 | 0.59 | 3 | 2 v | NS | 5vNS |
| Puebla | San Diego la Mesa  |      |      |      |      |      |   |     |    |      |
| Puebla | Tochimiltzingo     | 0.32 | 0.29 | 0.27 | 0.29 | 0.73 | 4 | 3 v | NS | 7vNS |
| Puebla | San Felipe         |      |      |      |      |      |   |     |    |      |
| Puebla | Teotlalcingo       | 0.60 | 0.31 | 0.45 | 0.46 | 0.46 | 2 | 3 d | NS | 5dNS |
| Puebla | San Felipe         |      |      |      |      |      |   |     |    |      |
| Puebla | Tepatlán           | 0.39 | 0.27 | 0.52 | 0.39 | 0.57 | 3 | 4 d | NS | 7dNS |
| Puebla | San Gabriel Chilac | 0.58 | 0.31 | 0.77 | 0.55 | 0.30 | 1 | 2 d | NS | 3dNS |
| Puebla | San Gregorio       |      |      |      |      |      |   |     |    |      |
| Puebla | Atzompa            | 0.71 | 0.37 | 0.23 | 0.44 | 0.49 | 2 | 3 d | NS | 5dNS |
| Puebla | San Jerónimo       |      |      |      |      |      |   |     |    |      |
| Puebla | Tecuanipan         | 0.47 | 0.32 | 0.28 | 0.36 | 0.63 | 3 | 3 b | NS | 6bNS |
| Puebla | San Jerónimo       |      |      |      |      |      |   |     |    |      |
| Puebla | Xayacatlán         | 0.38 | 0.31 | 0.30 | 0.33 | 0.67 | 3 | 3 b | LH | 6bLH |
| Puebla | San José Chiapa    | 0.56 | 0.32 | 0.50 | 0.46 | 0.45 | 2 | 2 b | NS | 4bNS |
| Puebla | San José           |      |      |      |      |      |   |     |    |      |
| Puebla | Miahuatlán         | 0.55 | 0.30 | 0.56 | 0.47 | 0.44 | 2 | 2 b | NS | 4bNS |
| Puebla | San Juan Atenco    | 0.41 | 0.32 | 0.40 | 0.38 | 0.59 | 3 | 2 v | NS | 5vNS |
| Puebla | San Juan Atzompa   | 0.40 | 0.27 | 0.62 | 0.43 | 0.50 | 2 | 4 d | NS | 6dNS |

|        |                            |      |      |      |      |      |   |     |    |      |
|--------|----------------------------|------|------|------|------|------|---|-----|----|------|
| Puebla | San Martín Texmelucan      | 0.78 | 0.37 | 0.39 | 0.51 | 0.36 | 2 | 3 d | NS | 5dNS |
| Puebla | San Martín Totoltepec      | 0.44 | 0.34 | 0.45 | 0.41 | 0.54 | 3 | 3 b | LH | 6bLH |
| Puebla | San Matías Tlalancaleca    | 0.67 | 0.32 | 0.57 | 0.52 | 0.36 | 2 | 3 d | NS | 5dNS |
| Puebla | San Miguel Ixtlán          | 0.32 | 0.26 | 0.42 | 0.33 | 0.66 | 3 | 3 b | LH | 6bLH |
| Puebla | San Miguel Xoxtla          | 0.71 | 0.42 | 0.45 | 0.53 | 0.34 | 1 | 3 d | NS | 4dNS |
| Puebla | San Nicolás Buenos Aires   | 0.53 | 0.28 | 0.39 | 0.40 | 0.55 | 3 | 2 v | NS | 5vNS |
| Puebla | San Nicolás de los Ranchos | 0.63 | 0.31 | 0.40 | 0.44 | 0.48 | 2 | 2 b | NS | 4bNS |
| Puebla | San Pablo Anicano          | 0.36 | 0.33 | 0.27 | 0.32 | 0.68 | 3 | 4 d | NS | 7dNS |
| Puebla | San Salvador Huixcolotla   | 0.64 | 0.29 | 0.31 | 0.41 | 0.53 | 2 | 3 d | NS | 5dNS |
| Puebla | San Sebastián Tlacotepec   | 0.38 | 0.25 | 0.41 | 0.35 | 0.64 | 3 | 4 d | HH | 7dHH |
| Puebla | Santa Catarina Tlaltepan   | 0.26 | 0.30 | 0.39 | 0.32 | 0.69 | 3 | 3 b | NS | 6bNS |
| Puebla | Santa Inés Ahuatempan      | 0.47 | 0.27 | 0.29 | 0.34 | 0.65 | 3 | 3 b | NS | 6bNS |
| Puebla | Santa Isabel Cholula       | 0.51 | 0.35 | 0.27 | 0.37 | 0.60 | 3 | 3 b | NS | 6bNS |
| Puebla | Santiago Miahuatlán        | 0.63 | 0.35 | 0.44 | 0.47 | 0.43 | 2 | 2 b | NS | 4bNS |
| Puebla | Huehuetlán el Grande       | 0.35 | 0.28 | 0.39 | 0.34 | 0.65 | 3 | 4 d | NS | 7dNS |
| Puebla | Santo Tomás Hueyotlipan    | 0.67 | 0.28 | 0.35 | 0.43 | 0.50 | 2 | 3 d | NS | 5dNS |
| Puebla | Soltepec                   | 0.54 | 0.29 | 0.43 | 0.42 | 0.53 | 2 | 2 b | NS | 4bNS |
| Puebla | Tecali de Herrera          | 0.56 | 0.34 | 0.37 | 0.42 | 0.51 | 2 | 5 d | NS | 7dNS |
| Puebla | Tecamachalco               | 0.62 | 0.33 | 0.35 | 0.44 | 0.49 | 2 | 2 b | NS | 4bNS |
| Puebla | Tecomatlán                 | 0.51 | 0.33 | 0.46 | 0.43 | 0.50 | 2 | 3 d | NS | 5dNS |
| Puebla | Tehuacán                   | 0.72 | 0.38 | 0.48 | 0.53 | 0.34 | 1 | 2 d | NS | 3dNS |
| Puebla | Tehuizingo                 | 0.47 | 0.31 | 0.22 | 0.33 | 0.66 | 3 | 3 b | LH | 6bLH |
| Puebla | Tenampulco                 | 0.43 | 0.31 | 0.24 | 0.33 | 0.68 | 3 | 4 d | HH | 7dHH |

|        |                             |      |      |      |      |      |   |     |    |      |
|--------|-----------------------------|------|------|------|------|------|---|-----|----|------|
| Puebla | Teopantlán                  | 0.44 | 0.26 | 0.42 | 0.37 | 0.60 | 3 | 4 d | HH | 7dHH |
| Puebla | Teotlalco                   | 0.37 | 0.32 | 0.43 | 0.37 | 0.60 | 3 | 2 v | NS | 5vNS |
| Puebla | Tepanco de López            | 0.59 | 0.34 | 0.51 | 0.48 | 0.42 | 2 | 2 b | NS | 4bNS |
| Puebla | Tepango de Rodríguez        | 0.47 | 0.24 | 0.43 | 0.38 | 0.58 | 3 | 4 d | NS | 7dNS |
| Puebla | Tepatlatxco de Hidalgo      | 0.72 | 0.30 | 0.34 | 0.45 | 0.47 | 2 | 3 d | NS | 5dNS |
| Puebla | Tepeaca                     | 0.67 | 0.33 | 0.39 | 0.46 | 0.45 | 2 | 3 d | NS | 5dNS |
| Puebla | Tepemaxalco                 | 0.29 | 0.25 | 0.44 | 0.33 | 0.67 | 3 | 2 v | NS | 5vNS |
| Puebla | Tepeojuma                   | 0.53 | 0.32 | 0.44 | 0.43 | 0.51 | 2 | 3 d | NS | 5dNS |
| Puebla | Tepetzintla                 | 0.31 | 0.27 | 0.35 | 0.31 | 0.70 | 3 | 3 b | NS | 6bNS |
| Puebla | Tepexco                     | 0.53 | 0.28 | 0.27 | 0.36 | 0.62 | 3 | 3 b | NS | 6bNS |
| Puebla | Tepexi de Rodríguez         | 0.46 | 0.33 | 0.42 | 0.40 | 0.55 | 3 | 3 b | NS | 6bNS |
| Puebla | Tepeyahualco                | 0.41 | 0.30 | 0.37 | 0.36 | 0.62 | 3 | 2 v | NS | 5vNS |
| Puebla | Tepeyahualco de Cuauhtémoc  | 0.58 | 0.31 | 0.40 | 0.43 | 0.50 | 2 | 3 d | NS | 5dNS |
| Puebla | Tetela de Ocampo            | 0.52 | 0.31 | 0.43 | 0.42 | 0.52 | 2 | 3 d | NS | 5dNS |
| Puebla | Teteles de Ávila            | 0.67 | 0.37 | 0.66 | 0.57 | 0.27 | 1 | 4 d | HL | 5dHL |
| Puebla | Castillo                    | 0.75 | 0.40 | 0.50 | 0.55 | 0.30 | 1 | 4 d | NS | 5dNS |
| Puebla | Teziutlán                   | 0.61 | 0.32 | 0.40 | 0.44 | 0.49 | 2 | 3 d | NS | 5dNS |
| Puebla | Tianguismanalco             | 0.61 | 0.32 | 0.40 | 0.44 | 0.49 | 2 | 3 d | NS | 5dNS |
| Puebla | Tilapa                      | 0.44 | 0.36 | 0.36 | 0.39 | 0.57 | 3 | 3 b | NS | 6bNS |
| Puebla | Tlacotepec de Benito Juárez | 0.51 | 0.30 | 0.42 | 0.41 | 0.53 | 2 | 2 b | NS | 4bNS |
| Puebla | Tlacuilotepec               | 0.35 | 0.29 | 0.33 | 0.32 | 0.68 | 3 | 5 d | NS | 8dNS |
| Puebla | Tlachichuca                 | 0.51 | 0.29 | 0.38 | 0.40 | 0.56 | 3 | 2 v | NS | 5vNS |
| Puebla | Tlahuapan                   | 0.56 | 0.30 | 0.41 | 0.43 | 0.51 | 2 | 3 d | NS | 5dNS |
| Puebla | Tlaltenango                 | 0.69 | 0.31 | 0.32 | 0.44 | 0.49 | 2 | 3 d | NS | 5dNS |
| Puebla | Tlanepantla                 | 0.71 | 0.26 | 0.34 | 0.44 | 0.49 | 2 | 4 d | NS | 6dNS |
| Puebla | Tlaola                      | 0.40 | 0.27 | 0.42 | 0.36 | 0.61 | 3 | 4 d | NS | 7dNS |
| Puebla | Tlapacoya                   | 0.33 | 0.27 | 0.40 | 0.33 | 0.67 | 3 | 4 d | NS | 7dNS |
| Puebla | Tlapanalá                   | 0.46 | 0.32 | 0.39 | 0.39 | 0.57 | 3 | 3 b | NS | 6bNS |
| Puebla | Tlatlauquitepec             | 0.52 | 0.33 | 0.45 | 0.43 | 0.50 | 2 | 4 d | HL | 6dHL |
| Puebla | Tlaxco                      | 0.43 | 0.28 | 0.39 | 0.37 | 0.61 | 3 | 4 d | NS | 7dNS |

|           |                          |      |      |      |      |      |   |     |    |      |
|-----------|--------------------------|------|------|------|------|------|---|-----|----|------|
| Puebla    | Tochimilco               | 0.55 | 0.28 | 0.35 | 0.39 | 0.57 | 3 | 2 v | LL | 5vLL |
| Puebla    | Tochtepec                | 0.68 | 0.31 | 0.37 | 0.45 | 0.47 | 2 | 3 d | NS | 5dNS |
| Puebla    | Totoltepec de Guerrero   | 0.37 | 0.30 | 0.37 | 0.34 | 0.65 | 3 | 3 b | LH | 6bLH |
| Puebla    | Tulcingo                 | 0.52 | 0.30 | 0.26 | 0.36 | 0.62 | 3 | 3 b | LH | 6bLH |
| Puebla    | Tuzamapan de Galeana     | 0.39 | 0.32 | 0.48 | 0.39 | 0.56 | 3 | 4 d | NS | 7dNS |
| Puebla    | Tzicatlacoyan Venustiano | 0.44 | 0.29 | 0.30 | 0.35 | 0.64 | 3 | 5 d | NS | 8dNS |
| Puebla    | Carranza                 | 0.58 | 0.32 | 0.38 | 0.43 | 0.51 | 2 | 4 d | NS | 6dNS |
| Puebla    | Vicente Guerrero         | 0.39 | 0.25 | 0.33 | 0.32 | 0.68 | 3 | 2 v | LH | 5vLH |
| Puebla    | Xayacatlán de Bravo      | 0.33 | 0.34 | 0.35 | 0.34 | 0.66 | 3 | 3 b | LH | 6bLH |
| Puebla    | Xicotepec                | 0.61 | 0.32 | 0.42 | 0.45 | 0.47 | 2 | 5 d | NS | 7dNS |
| Puebla    | Zinacatepec              | 0.65 | 0.30 | 0.73 | 0.56 | 0.29 | 1 | 2 d | NS | 3dNS |
| Puebla    | Zongozotla               | 0.63 | 0.25 | 0.50 | 0.46 | 0.45 | 2 | 4 d | NS | 6dNS |
| Puebla    | Zoquiapan                | 0.38 | 0.28 | 0.48 | 0.38 | 0.59 | 3 | 4 d | NS | 7dNS |
| Puebla    | Zoquitlán                | 0.42 | 0.24 | 0.31 | 0.32 | 0.68 | 3 | 4 d | HH | 7dHH |
| Queretaro | Amealco de Bonfil        | 0.60 | 0.36 | 0.39 | 0.45 | 0.47 | 2 | 4 d | HL | 6dHL |
| Queretaro | Pinal de Amoles          | 0.52 | 0.31 | 0.23 | 0.35 | 0.63 | 3 | 3 b | NS | 6bNS |
| Queretaro | Arroyo Seco              | 0.56 | 0.37 | 0.34 | 0.42 | 0.52 | 2 | 3 d | NS | 5dNS |
| Queretaro | Cadereyta de Montes      | 0.59 | 0.38 | 0.36 | 0.44 | 0.48 | 2 | 3 d | NS | 5dNS |
| Queretaro | Colón                    | 0.66 | 0.44 | 0.44 | 0.51 | 0.37 | 2 | 3 d | LL | 5dLL |
| Queretaro | Corregidora              | 0.84 | 0.55 | 0.50 | 0.63 | 0.17 | 1 | 5 d | HL | 6dHL |
| Queretaro | Ezequiel Montes          | 0.72 | 0.40 | 0.45 | 0.52 | 0.35 | 1 | 3 d | LL | 4dLL |
| Queretaro | Huimilpan                | 0.54 | 0.40 | 0.44 | 0.46 | 0.45 | 2 | 4 d | HL | 6dHL |
| Queretaro | Jalpan de Serra          | 0.62 | 0.38 | 0.34 | 0.44 | 0.48 | 2 | 4 d | NS | 6dNS |
| Queretaro | Landa de Matamoros       | 0.49 | 0.34 | 0.26 | 0.36 | 0.61 | 3 | 4 d | HH | 7dHH |
| Queretaro | El Marqués               | 0.71 | 0.46 | 0.50 | 0.56 | 0.29 | 1 | 3 d | LL | 4dLL |
| Queretaro | Pedro Escobedo           | 0.70 | 0.45 | 0.57 | 0.57 | 0.26 | 1 | 4 d | HL | 5dHL |
| Queretaro | Peñamiller               | 0.50 | 0.38 | 0.28 | 0.39 | 0.57 | 3 | 3 b | NS | 6bNS |
| Queretaro | Querétaro                | 0.93 | 0.51 | 0.47 | 0.63 | 0.16 | 1 | 3 d | LL | 4dLL |
| Queretaro | San Joaquín              | 0.49 | 0.38 | 0.31 | 0.40 | 0.56 | 3 | 3 b | NS | 6bNS |



|                 |                  |      |      |      |      |      |   |     |    |      |
|-----------------|------------------|------|------|------|------|------|---|-----|----|------|
| Queretaro       | San Juan del Río | 0.78 | 0.47 | 0.48 | 0.58 | 0.26 | 1 | 3 d | LL | 4dLL |
| Queretaro       | Tequisquiapan    | 0.84 | 0.43 | 0.52 | 0.60 | 0.23 | 1 | 3 d | LL | 4dLL |
| Queretaro       | Tolimán          | 0.60 | 0.37 | 0.38 | 0.45 | 0.47 | 2 | 3 d | NS | 5dNS |
| Quintana Roo    | Cozumel          | 0.84 | 0.51 | 0.74 | 0.70 | 0.06 | 1 | 3 d | LL | 4dLL |
|                 | Felipe Carrillo  |      |      |      |      |      |   |     |    |      |
| Quintana Roo    | Puerto           | 0.64 | 0.37 | 0.74 | 0.58 | 0.25 | 1 | 4 d | HL | 5dHL |
| Quintana Roo    | Isla Mujeres     | 0.85 | 0.47 | 0.70 | 0.67 | 0.10 | 1 | 3 d | LL | 4dLL |
| Quintana Roo    | Othón P. Blanco  | 0.83 | 0.47 | 0.76 | 0.69 | 0.07 | 1 | 5 d | HL | 6dHL |
| Quintana Roo    | Benito Juárez    | 0.87 | 0.52 | 0.73 | 0.71 | 0.04 | 1 | 3 d | LL | 4dLL |
|                 | José María       |      |      |      |      |      |   |     |    |      |
| Quintana Roo    | Morelos          | 0.64 | 0.35 | 0.74 | 0.58 | 0.26 | 1 | 3 d | LL | 4dLL |
| Quintana Roo    | Lázaro Cárdenas  | 0.62 | 0.39 | 0.74 | 0.58 | 0.25 | 1 | 3 d | LL | 4dLL |
| Quintana Roo    | Solidaridad      | 0.85 | 0.53 | 0.70 | 0.70 | 0.06 | 1 | 3 d | LL | 4dLL |
| Quintana Roo    | Tulum            | 0.77 | 0.49 | 0.68 | 0.65 | 0.14 | 1 | 3 d | LL | 4dLL |
| Quintana Roo    | Bacalar          | 0.80 | 0.45 | 0.74 | 0.67 | 0.11 | 1 | 4 d | HL | 5dHL |
| Quintana Roo    | Puerto Morelos   | 0.86 | 0.47 | 0.71 | 0.68 | 0.09 | 1 | 3 d | LL | 4dLL |
| San Luis Potosí | Ahualulco        | 0.47 | 0.31 | 0.23 | 0.34 | 0.66 | 3 | 3 b | NS | 6bNS |
| San Luis Potosí | Alaquines        | 0.42 | 0.29 | 0.22 | 0.31 | 0.71 | 4 | 3 v | NS | 7vNS |
| San Luis Potosí | Aquismón         | 0.40 | 0.25 | 0.23 | 0.29 | 0.73 | 4 | 5 d | HH | 9dHH |
|                 | Armadillo de los |      |      |      |      |      |   |     |    |      |
| San Luis Potosí | Infante          | 0.45 | 0.32 | 0.31 | 0.36 | 0.62 | 3 | 3 b | NS | 6bNS |
| San Luis Potosí | Cárdenas         | 0.61 | 0.36 | 0.40 | 0.45 | 0.46 | 2 | 3 d | NS | 5dNS |
| San Luis Potosí | Rioverde         | 0.59 | 0.35 | 0.35 | 0.43 | 0.51 | 2 | 4 d | NS | 6dNS |
| San Luis Potosí | Salinas          | 0.58 | 0.32 | 0.26 | 0.39 | 0.58 | 3 | 4 d | NS | 7dNS |
| San Luis Potosí | San Antonio      | 0.37 | 0.24 | 0.22 | 0.27 | 0.76 | 4 | 5 d | NS | 9dNS |
|                 | San Ciro de      |      |      |      |      |      |   |     |    |      |
| San Luis Potosí | Acosta           | 0.58 | 0.32 | 0.38 | 0.43 | 0.51 | 2 | 3 d | NS | 5dNS |
| San Luis Potosí | Catorce          | 0.45 | 0.34 | 0.24 | 0.34 | 0.65 | 3 | 3 b | NS | 6bNS |
| San Luis Potosí | San Luis Potosí  | 0.75 | 0.48 | 0.45 | 0.56 | 0.29 | 1 | 4 d | NS | 5dNS |
|                 | San Martín       |      |      |      |      |      |   |     |    |      |
| San Luis Potosí | Chalchicuaútl    | 0.38 | 0.26 | 0.21 | 0.29 | 0.74 | 4 | 5 d | HH | 9dHH |
|                 | San Nicolás      |      |      |      |      |      |   |     |    |      |
| San Luis Potosí | Tolentino        | 0.34 | 0.31 | 0.31 | 0.32 | 0.68 | 3 | 3 b | NS | 6bNS |
| San Luis Potosí | Santa Catarina   | 0.28 | 0.25 | 0.14 | 0.22 | 0.85 | 4 | 4 b | NS | 8bNS |

|                 |                           |      |      |      |      |      |   |     |    |      |
|-----------------|---------------------------|------|------|------|------|------|---|-----|----|------|
| San Luis Potosí | Santa María del Río       | 0.52 | 0.34 | 0.28 | 0.38 | 0.59 | 3 | 3 b | NS | 6bNS |
| San Luis Potosí | Santo Domingo San Vicente | 0.39 | 0.33 | 0.39 | 0.37 | 0.60 | 3 | 4 d | NS | 7dNS |
| San Luis Potosí | Tancuayalab Soledad de    | 0.56 | 0.30 | 0.33 | 0.40 | 0.55 | 3 | 5 d | NS | 8dNS |
| San Luis Potosí | Graciano Sánchez          | 0.79 | 0.47 | 0.37 | 0.54 | 0.31 | 1 | 4 d | NS | 5dNS |
| San Luis Potosí | Tamasopo                  | 0.55 | 0.34 | 0.29 | 0.39 | 0.57 | 3 | 4 d | HH | 7dHH |
| San Luis Potosí | Tamazunchale              | 0.45 | 0.29 | 0.23 | 0.33 | 0.68 | 3 | 5 d | HH | 8dHH |
| San Luis Potosí | Tampacán Tampamolón       | 0.38 | 0.27 | 0.23 | 0.29 | 0.73 | 4 | 5 d | NS | 9dNS |
| San Luis Potosí | Corona                    | 0.41 | 0.27 | 0.28 | 0.32 | 0.69 | 3 | 5 d | NS | 8dNS |
| San Luis Potosí | Tamuín                    | 0.54 | 0.36 | 0.38 | 0.43 | 0.51 | 2 | 5 d | NS | 7dNS |
| San Luis Potosí | Tanlajás Tanquián de      | 0.40 | 0.25 | 0.34 | 0.33 | 0.67 | 3 | 5 d | NS | 8dNS |
| San Luis Potosí | Escobedo                  | 0.56 | 0.29 | 0.39 | 0.41 | 0.53 | 2 | 5 d | HH | 7dHH |
| San Luis Potosí | Tierra Nueva              | 0.49 | 0.29 | 0.34 | 0.37 | 0.60 | 3 | 3 b | NS | 6bNS |
| San Luis Potosí | Cedral                    | 0.58 | 0.37 | 0.31 | 0.42 | 0.52 | 2 | 3 d | NS | 5dNS |
| San Luis Potosí | Cerritos Cerro de San     | 0.60 | 0.36 | 0.40 | 0.45 | 0.46 | 2 | 4 d | NS | 6dNS |
| San Luis Potosí | Pedro                     | 0.48 | 0.46 | 0.34 | 0.43 | 0.51 | 2 | 4 d | NS | 6dNS |
| San Luis Potosí | Ciudad del Maíz           | 0.50 | 0.30 | 0.30 | 0.37 | 0.61 | 3 | 3 b | NS | 6bNS |
| San Luis Potosí | Ciudad Fernández          | 0.60 | 0.34 | 0.41 | 0.45 | 0.48 | 2 | 3 d | NS | 5dNS |
| San Luis Potosí | Tancanhuitz               | 0.44 | 0.29 | 0.20 | 0.31 | 0.70 | 3 | 5 d | HH | 8dHH |
| San Luis Potosí | Ciudad Valles             | 0.65 | 0.41 | 0.38 | 0.48 | 0.41 | 2 | 5 d | NS | 7dNS |
| San Luis Potosí | Coxcatlán                 | 0.48 | 0.27 | 0.24 | 0.33 | 0.67 | 3 | 5 d | HH | 8dHH |
| San Luis Potosí | Charcas                   | 0.57 | 0.38 | 0.37 | 0.44 | 0.49 | 2 | 4 d | NS | 6dNS |
| San Luis Potosí | Ebano                     | 0.63 | 0.34 | 0.40 | 0.46 | 0.46 | 2 | 4 d | NS | 6dNS |
| San Luis Potosí | Guadalcázar               | 0.39 | 0.29 | 0.12 | 0.27 | 0.78 | 4 | 3 v | NS | 7vNS |
| San Luis Potosí | Huehuatlán                | 0.41 | 0.29 | 0.30 | 0.33 | 0.67 | 3 | 5 d | HH | 8dHH |
| San Luis Potosí | Lagunillas                | 0.32 | 0.31 | 0.23 | 0.29 | 0.74 | 4 | 3 v | NS | 7vNS |
| San Luis Potosí | Matehuala Mexquitic de    | 0.73 | 0.41 | 0.37 | 0.50 | 0.38 | 2 | 3 d | NS | 5dNS |
| San Luis Potosí | Carmona                   | 0.45 | 0.35 | 0.24 | 0.34 | 0.65 | 3 | 3 b | NS | 6bNS |
| San Luis Potosí | Moctezuma                 | 0.47 | 0.31 | 0.22 | 0.33 | 0.67 | 3 | 3 b | NS | 6bNS |

|                 |                    |      |      |      |      |      |   |     |    |      |
|-----------------|--------------------|------|------|------|------|------|---|-----|----|------|
| San Luis Potosí | Rayón              | 0.46 | 0.31 | 0.31 | 0.36 | 0.62 | 3 | 3 b | NS | 6bNS |
| San Luis Potosí | Vanegas            | 0.50 | 0.32 | 0.20 | 0.34 | 0.66 | 3 | 3 b | NS | 6bNS |
| San Luis Potosí | Venado             | 0.49 | 0.33 | 0.26 | 0.36 | 0.62 | 3 | 3 b | NS | 6bNS |
| San Luis Potosí | Villa de Arriaga   | 0.48 | 0.32 | 0.24 | 0.35 | 0.64 | 3 | 3 b | NS | 6bNS |
| San Luis Potosí | Villa de Guadalupe | 0.37 | 0.29 | 0.17 | 0.28 | 0.76 | 4 | 3 v | NS | 7vNS |
| San Luis Potosí | Villa de la Paz    | 0.60 | 0.42 | 0.33 | 0.45 | 0.47 | 2 | 3 d | NS | 5dNS |
| San Luis Potosí | Villa de Arista    | 0.51 | 0.31 | 0.30 | 0.37 | 0.60 | 3 | 3 b | NS | 6bNS |
| San Luis Potosí | Matlapa            | 0.46 | 0.27 | 0.21 | 0.31 | 0.70 | 3 | 5 d | HH | 8dHH |
| San Luis Potosí | Villa de Ramos     | 0.55 | 0.27 | 0.26 | 0.36 | 0.62 | 3 | 5 d | NS | 8dNS |
| San Luis Potosí | Villa de Reyes     | 0.54 | 0.37 | 0.29 | 0.40 | 0.55 | 3 | 2 v | NS | 5vNS |
| San Luis Potosí | Villa Hidalgo      | 0.48 | 0.36 | 0.28 | 0.37 | 0.60 | 3 | 3 b | NS | 6bNS |
| San Luis Potosí | Villa Juárez       | 0.45 | 0.31 | 0.35 | 0.37 | 0.61 | 3 | 3 b | NS | 6bNS |
| San Luis Potosí | Axtla de Terrazas  | 0.51 | 0.28 | 0.30 | 0.36 | 0.62 | 3 | 5 d | NS | 8dNS |
| San Luis Potosí | Xilitla            | 0.49 | 0.26 | 0.29 | 0.35 | 0.64 | 3 | 5 d | NS | 8dNS |
| San Luis Potosí | Zaragoza           | 0.50 | 0.38 | 0.33 | 0.40 | 0.55 | 3 | 3 b | NS | 6bNS |
| San Luis Potosí | El Naranjo         | 0.61 | 0.37 | 0.43 | 0.47 | 0.44 | 2 | 4 d | NS | 6dNS |
| Sinaloa         | Ahome              | 0.74 | 0.29 | 0.60 | 0.54 | 0.32 | 1 | 4 d | NS | 5dNS |
| Sinaloa         | Angostura          | 0.66 | 0.25 | 0.57 | 0.49 | 0.40 | 2 | 3 d | NS | 5dNS |
| Sinaloa         | Badiraguato        | 0.46 | 0.16 | 0.21 | 0.28 | 0.75 | 4 | 3 v | NS | 7vNS |
| Sinaloa         | Concordia          | 0.59 | 0.23 | 0.41 | 0.41 | 0.54 | 3 | 3 b | NS | 6bNS |
| Sinaloa         | Cosalá             | 0.54 | 0.17 | 0.34 | 0.35 | 0.64 | 3 | 3 b | LH | 6bLH |
| Sinaloa         | Culiacán           | 0.78 | 0.30 | 0.53 | 0.54 | 0.33 | 1 | 4 d | HH | 5dHH |
| Sinaloa         | Choix              | 0.49 | 0.17 | 0.31 | 0.33 | 0.68 | 3 | 4 d | HH | 7dHH |
| Sinaloa         | Elota              | 0.58 | 0.24 | 0.45 | 0.43 | 0.51 | 2 | 3 d | NS | 5dNS |
| Sinaloa         | Escuinapa          | 0.78 | 0.23 | 0.39 | 0.47 | 0.44 | 2 | 4 d | NS | 6dNS |
| Sinaloa         | El Fuerte          | 0.62 | 0.24 | 0.46 | 0.44 | 0.49 | 2 | 4 d | NS | 6dNS |
| Sinaloa         | Guasave            | 0.69 | 0.26 | 0.65 | 0.53 | 0.33 | 1 | 3 d | NS | 4dNS |
| Sinaloa         | Mazatlán           | 0.83 | 0.31 | 0.47 | 0.53 | 0.33 | 1 | 4 d | NS | 5dNS |
| Sinaloa         | Mocorito           | 0.56 | 0.21 | 0.38 | 0.38 | 0.58 | 3 | 3 b | NS | 6bNS |
| Sinaloa         | Rosario            | 0.67 | 0.25 | 0.38 | 0.43 | 0.50 | 2 | 4 d | NS | 6dNS |
| Sinaloa         | Salvador Alvarado  | 0.73 | 0.28 | 0.59 | 0.53 | 0.33 | 1 | 4 d | NS | 5dNS |
| Sinaloa         | San Ignacio        | 0.55 | 0.21 | 0.40 | 0.39 | 0.58 | 3 | 4 d | NS | 7dNS |
| Sinaloa         | Sinaloa            | 0.55 | 0.21 | 0.42 | 0.39 | 0.57 | 3 | 3 b | NS | 6bNS |

|         |                |      |      |      |      |      |   |     |    |      |
|---------|----------------|------|------|------|------|------|---|-----|----|------|
| Sinaloa | Navolato       | 0.65 | 0.28 | 0.60 | 0.51 | 0.37 | 2 | 4 d | NS | 6dNS |
| Sonora  | Aconchi        | 0.54 | 0.46 | 0.40 | 0.47 | 0.44 | 2 | 3 d | NS | 5dNS |
| Sonora  | Agua Prieta    | 0.81 | 0.42 | 0.40 | 0.55 | 0.31 | 1 | 4 d | NS | 5dNS |
| Sonora  | Álamos         | 0.61 | 0.34 | 0.31 | 0.42 | 0.52 | 2 | 5 d | NS | 7dNS |
| Sonora  | Altar          | 0.71 | 0.38 | 0.39 | 0.49 | 0.40 | 2 | 4 d | NS | 6dNS |
| Sonora  | Arivechi       | 0.53 | 0.44 | 0.39 | 0.46 | 0.46 | 2 | 3 d | NS | 5dNS |
| Sonora  | Arizpe         | 0.53 | 0.46 | 0.37 | 0.45 | 0.46 | 2 | 4 d | NS | 6dNS |
| Sonora  | Atil           | 0.54 | 0.48 | 0.43 | 0.48 | 0.42 | 2 | 4 d | NS | 6dNS |
| Sonora  | Bacadéhuachi   | 0.55 | 0.41 | 0.41 | 0.46 | 0.46 | 2 | 4 d | NS | 6dNS |
| Sonora  | Bacanora       | 0.49 | 0.43 | 0.38 | 0.43 | 0.50 | 2 | 2 b | NS | 4bNS |
| Sonora  | Bacerac        | 0.52 | 0.39 | 0.36 | 0.42 | 0.52 | 2 | 5 d | HL | 7dHL |
| Sonora  | Bacoachi       | 0.51 | 0.43 | 0.37 | 0.44 | 0.49 | 2 | 3 d | NS | 5dNS |
| Sonora  | Bácum          | 0.70 | 0.39 | 0.46 | 0.51 | 0.36 | 2 | 5 d | HL | 7dHL |
| Sonora  | Banámichi      | 0.50 | 0.45 | 0.41 | 0.45 | 0.46 | 2 | 3 d | NS | 5dNS |
| Sonora  | Baviácora      | 0.49 | 0.46 | 0.40 | 0.45 | 0.47 | 2 | 2 b | NS | 4bNS |
| Sonora  | Bavispe        | 0.49 | 0.39 | 0.39 | 0.43 | 0.51 | 2 | 4 d | HL | 6dHL |
| Sonora  | Benjamín Hill  | 0.72 | 0.43 | 0.40 | 0.51 | 0.36 | 2 | 3 d | NS | 5dNS |
| Sonora  | Caborca        | 0.76 | 0.43 | 0.41 | 0.53 | 0.33 | 1 | 4 d | NS | 5dNS |
| Sonora  | Cajeme         | 0.80 | 0.45 | 0.49 | 0.58 | 0.25 | 1 | 4 d | HL | 5dHL |
| Sonora  | Cananea        | 0.77 | 0.43 | 0.40 | 0.54 | 0.33 | 1 | 3 d | NS | 4dNS |
| Sonora  | Cumpas         | 0.66 | 0.46 | 0.41 | 0.51 | 0.36 | 2 | 3 d | NS | 5dNS |
| Sonora  | Divisaderos    | 0.51 | 0.43 | 0.41 | 0.45 | 0.47 | 2 | 5 d | HL | 7dHL |
| Sonora  | Empalme        | 0.76 | 0.43 | 0.40 | 0.53 | 0.34 | 1 | 4 d | HL | 5dHL |
| Sonora  | Etchojoa       | 0.64 | 0.35 | 0.39 | 0.46 | 0.46 | 2 | 5 d | HL | 7dHL |
| Sonora  | Carbó          | 0.69 | 0.37 | 0.38 | 0.48 | 0.42 | 2 | 3 d | NS | 5dNS |
| Sonora  | Puerto Peñasco | 0.79 | 0.40 | 0.51 | 0.57 | 0.27 | 1 | 5 d | NS | 6dNS |
| Sonora  | Quiriego       | 0.41 | 0.36 | 0.64 | 0.47 | 0.44 | 2 | 5 d | HL | 7dHL |
| Sonora  | La Colorada    | 0.48 | 0.47 | 0.33 | 0.43 | 0.51 | 2 | 4 d | NS | 6dNS |
| Sonora  | Cucurpe        | 0.50 | 0.43 | 0.30 | 0.41 | 0.54 | 3 | 3 b | NS | 6bNS |
| Sonora  | Fronteras      | 0.69 | 0.44 | 0.41 | 0.52 | 0.36 | 2 | 3 d | LL | 5dLL |
| Sonora  | Granados       | 0.52 | 0.47 | 0.45 | 0.48 | 0.42 | 2 | 4 d | HL | 6dHL |
| Sonora  | Guaymas        | 0.75 | 0.44 | 0.38 | 0.52 | 0.35 | 1 | 4 d | HL | 5dHL |
| Sonora  | Hermosillo     | 0.83 | 0.47 | 0.40 | 0.56 | 0.28 | 1 | 3 d | NS | 4dNS |

|        |                 |      |      |      |      |      |   |     |    |      |
|--------|-----------------|------|------|------|------|------|---|-----|----|------|
| Sonora | Huachinera      | 0.53 | 0.43 | 0.50 | 0.49 | 0.41 | 2 | 5 d | NS | 7dNS |
| Sonora | Huásabas        | 0.50 | 0.42 | 0.42 | 0.45 | 0.48 | 2 | 4 d | HL | 6dHL |
| Sonora | Huatabampo      | 0.67 | 0.36 | 0.36 | 0.46 | 0.45 | 2 | 5 d | HL | 7dHL |
| Sonora | Huépac          | 0.54 | 0.51 | 0.43 | 0.49 | 0.40 | 2 | 3 d | NS | 5dNS |
| Sonora | Imuris          | 0.65 | 0.41 | 0.38 | 0.48 | 0.42 | 2 | 5 d | NS | 7dNS |
| Sonora | Magdalena       | 0.76 | 0.44 | 0.39 | 0.53 | 0.34 | 1 | 5 d | NS | 6dNS |
| Sonora | Mazatán         | 0.51 | 0.47 | 0.39 | 0.46 | 0.46 | 2 | 5 d | NS | 7dNS |
| Sonora | Moctezuma       | 0.77 | 0.46 | 0.41 | 0.55 | 0.31 | 1 | 4 d | NS | 5dNS |
| Sonora | Naco            | 0.74 | 0.38 | 0.39 | 0.50 | 0.38 | 2 | 4 d | HL | 6dHL |
| Sonora | Nácori Chico    | 0.51 | 0.33 | 0.47 | 0.44 | 0.49 | 2 | 5 d | NS | 7dNS |
| Sonora | Nacozari de     |      |      |      |      |      |   |     |    |      |
| Sonora | García          | 0.79 | 0.48 | 0.40 | 0.56 | 0.29 | 1 | 4 d | NS | 5dNS |
| Sonora | Navjoa          | 0.73 | 0.40 | 0.39 | 0.51 | 0.37 | 2 | 5 d | HL | 7dHL |
| Sonora | Nogales         | 0.85 | 0.45 | 0.34 | 0.55 | 0.31 | 1 | 4 d | HL | 5dHL |
| Sonora | Ónavas          | 0.48 | 0.47 | 0.40 | 0.45 | 0.47 | 2 | 3 d | NS | 5dNS |
| Sonora | Opodepe         | 0.47 | 0.40 | 0.37 | 0.41 | 0.53 | 2 | 3 d | NS | 5dNS |
| Sonora | Oquitoa         | 0.50 | 0.50 | 0.39 | 0.46 | 0.45 | 2 | 4 d | NS | 6dNS |
| Sonora | Pitiquito       | 0.76 | 0.44 | 0.39 | 0.53 | 0.34 | 1 | 3 d | NS | 4dNS |
| Sonora | Rayón           | 0.50 | 0.42 | 0.41 | 0.44 | 0.48 | 2 | 3 d | NS | 5dNS |
| Sonora | Rosario         | 0.59 | 0.37 | 0.37 | 0.44 | 0.48 | 2 | 4 d | NS | 6dNS |
| Sonora | Sahuaripa       | 0.65 | 0.39 | 0.39 | 0.48 | 0.42 | 2 | 3 d | NS | 5dNS |
| Sonora | San Felipe de   |      |      |      |      |      |   |     |    |      |
| Sonora | Jesús           | 0.46 | 0.49 | 0.42 | 0.46 | 0.46 | 2 | 3 d | NS | 5dNS |
| Sonora | San Javier      | 0.48 | 0.52 | 0.32 | 0.44 | 0.48 | 2 | 3 d | NS | 5dNS |
| Sonora | San Luis Río    |      |      |      |      |      |   |     |    |      |
| Sonora | Colorado        | 0.76 | 0.41 | 0.36 | 0.51 | 0.37 | 2 | 4 d | HL | 6dHL |
| Sonora | Soyopa          | 0.47 | 0.47 | 0.40 | 0.45 | 0.47 | 2 | 3 d | NS | 5dNS |
| Sonora | Suaqui Grande   | 0.51 | 0.46 | 0.40 | 0.46 | 0.46 | 2 | 4 d | NS | 6dNS |
| Sonora | San Miguel de   |      |      |      |      |      |   |     |    |      |
| Sonora | Horcasitas      | 0.62 | 0.34 | 0.39 | 0.45 | 0.47 | 2 | 3 d | NS | 5dNS |
| Sonora | Tepache         | 0.53 | 0.44 | 0.42 | 0.46 | 0.45 | 2 | 5 d | NS | 7dNS |
| Sonora | Trincheras      | 0.48 | 0.44 | 0.37 | 0.43 | 0.51 | 2 | 3 d | NS | 5dNS |
| Sonora | San Pedro de la |      |      |      |      |      |   |     |    |      |
| Sonora | Cueva           | 0.47 | 0.45 | 0.38 | 0.44 | 0.49 | 2 | 3 d | NS | 5dNS |

|            |                        |      |      |      |      |      |   |     |    |      |
|------------|------------------------|------|------|------|------|------|---|-----|----|------|
| Sonora     | Santa Ana              | 0.69 | 0.44 | 0.39 | 0.51 | 0.38 | 2 | 4 d | NS | 6dNS |
| Sonora     | Santa Cruz             | 0.49 | 0.43 | 0.34 | 0.42 | 0.52 | 2 | 4 d | HL | 6dHL |
| Sonora     | Sáric                  | 0.48 | 0.44 | 0.38 | 0.43 | 0.50 | 2 | 4 d | NS | 6dNS |
| Sonora     | Tubutama               | 0.44 | 0.45 | 0.34 | 0.41 | 0.54 | 3 | 4 d | HL | 7dHL |
| Sonora     | Ures                   | 0.64 | 0.45 | 0.40 | 0.50 | 0.39 | 2 | 3 d | NS | 5dNS |
| Sonora     | Villa Hidalgo          | 0.54 | 0.48 | 0.40 | 0.47 | 0.43 | 2 | 4 d | NS | 6dNS |
| Sonora     | Villa Pesqueira        | 0.48 | 0.42 | 0.38 | 0.43 | 0.51 | 2 | 5 d | NS | 7dNS |
| Sonora     | Yécora                 | 0.66 | 0.29 | 0.34 | 0.43 | 0.51 | 2 | 4 d | NS | 6dNS |
|            |                        |      |      |      |      |      |   |     |    |      |
| Sonora     | General Plutarco       |      |      |      |      |      |   |     |    |      |
| Sonora     | Elías Calles           | 0.73 | 0.39 | 0.38 | 0.50 | 0.39 | 2 | 5 d | HL | 7dHL |
| Sonora     | Benito Juárez          | 0.68 | 0.37 | 0.69 | 0.58 | 0.25 | 1 | 5 d | HL | 6dHL |
|            |                        |      |      |      |      |      |   |     |    |      |
| Sonora     | San Ignacio Río Muerto | 0.74 | 0.35 | 0.48 | 0.52 | 0.35 | 2 | 5 d | HL | 7dHL |
| Tabasco    | Balancán               | 0.58 | 0.41 | 0.84 | 0.61 | 0.20 | 1 | 4 d | HL | 5dHL |
| Tabasco    | Cárdenas               | 0.70 | 0.43 | 0.76 | 0.63 | 0.17 | 1 | 2 d | LL | 3dLL |
| Tabasco    | Centla                 | 0.63 | 0.40 | 0.66 | 0.56 | 0.29 | 1 | 4 d | HL | 5dHL |
| Tabasco    | Centro                 | 0.77 | 0.53 | 0.89 | 0.73 | 0.00 | 1 | 3 d | LL | 4dLL |
| Tabasco    | Comalcalco             | 0.62 | 0.44 | 0.81 | 0.62 | 0.18 | 1 | 2 d | LL | 3dLL |
| Tabasco    | Cunduacán              | 0.58 | 0.44 | 0.73 | 0.58 | 0.25 | 1 | 3 d | LL | 4dLL |
| Tabasco    | Emiliano Zapata        | 0.74 | 0.43 | 0.90 | 0.69 | 0.07 | 1 | 4 d | HL | 5dHL |
| Tabasco    | Huimanguillo           | 0.61 | 0.42 | 0.69 | 0.57 | 0.27 | 1 | 3 d | LL | 4dLL |
| Tabasco    | Jalapa                 | 0.55 | 0.46 | 0.84 | 0.61 | 0.20 | 1 | 4 d | HL | 5dHL |
| Tabasco    | Jalpa de Méndez        | 0.66 | 0.45 | 0.82 | 0.64 | 0.15 | 1 | 3 d | LL | 4dLL |
| Tabasco    | Jonuta                 | 0.53 | 0.37 | 0.84 | 0.58 | 0.26 | 1 | 4 d | HL | 5dHL |
| Tabasco    | Macuspana              | 0.63 | 0.41 | 0.77 | 0.60 | 0.21 | 1 | 4 d | HL | 5dHL |
| Tabasco    | Nacajuca               | 0.66 | 0.49 | 0.88 | 0.67 | 0.10 | 1 | 3 d | LL | 4dLL |
| Tabasco    | Paraíso                | 0.71 | 0.46 | 0.83 | 0.67 | 0.11 | 1 | 3 d | LL | 4dLL |
| Tabasco    | Tacotalpa              | 0.54 | 0.40 | 0.85 | 0.59 | 0.23 | 1 | 4 d | HL | 5dHL |
| Tabasco    | Teapa                  | 0.66 | 0.46 | 0.84 | 0.65 | 0.13 | 1 | 4 d | HL | 5dHL |
| Tabasco    | Tenosique              | 0.66 | 0.43 | 0.83 | 0.64 | 0.16 | 1 | 4 d | HL | 5dHL |
| Tamaulipas | Abasolo                | 0.66 | 0.38 | 0.51 | 0.51 | 0.36 | 2 | 3 d | NS | 5dNS |
| Tamaulipas | Aldama                 | 0.61 | 0.40 | 0.37 | 0.46 | 0.46 | 2 | 4 d | HL | 6dHL |
| Tamaulipas | Altamira               | 0.77 | 0.45 | 0.41 | 0.55 | 0.31 | 1 | 4 d | HL | 5dHL |

|            |                 |      |      |      |      |      |   |     |    |      |
|------------|-----------------|------|------|------|------|------|---|-----|----|------|
| Tamaulipas | Antiguo Morelos | 0.62 | 0.40 | 0.37 | 0.46 | 0.45 | 2 | 4 d | HL | 6dHL |
| Tamaulipas | Burgos          | 0.49 | 0.41 | 0.32 | 0.40 | 0.55 | 3 | 4 d | NS | 7dNS |
| Tamaulipas | Bustamante      | 0.42 | 0.30 | 0.21 | 0.31 | 0.71 | 3 | 4 d | NS | 7dNS |
| Tamaulipas | Camargo         | 0.65 | 0.46 | 0.46 | 0.53 | 0.34 | 1 | 4 d | HL | 5dHL |
| Tamaulipas | Casas           | 0.42 | 0.39 | 0.24 | 0.35 | 0.63 | 3 | 3 b | NS | 6bNS |
| Tamaulipas | Ciudad Madero   | 0.88 | 0.52 | 0.42 | 0.61 | 0.21 | 1 | 5 d | NS | 6dNS |
| Tamaulipas | Cruillas        | 0.44 | 0.44 | 0.34 | 0.41 | 0.54 | 3 | 3 b | NS | 6bNS |
| Tamaulipas | Gómez Farías    | 0.51 | 0.39 | 0.46 | 0.45 | 0.46 | 2 | 5 d | NS | 7dNS |
| Tamaulipas | González        | 0.64 | 0.37 | 0.45 | 0.49 | 0.41 | 2 | 5 d | HL | 7dHL |
| Tamaulipas | Güémez          | 0.51 | 0.40 | 0.41 | 0.44 | 0.49 | 2 | 3 d | NS | 5dNS |
| Tamaulipas | Guerrero        | 0.70 | 0.45 | 0.39 | 0.51 | 0.36 | 2 | 4 d | HL | 6dHL |
| Tamaulipas | Gustavo Díaz    |      |      |      |      |      |   |     |    |      |
| Tamaulipas | Ordaz           | 0.67 | 0.45 | 0.53 | 0.55 | 0.30 | 1 | 5 d | HL | 6dHL |
| Tamaulipas | Hidalgo         | 0.60 | 0.36 | 0.42 | 0.46 | 0.45 | 2 | 3 d | NS | 5dNS |
| Tamaulipas | Jaumave         | 0.56 | 0.37 | 0.39 | 0.44 | 0.49 | 2 | 3 d | NS | 5dNS |
| Tamaulipas | Miquihuana      | 0.40 | 0.32 | 0.36 | 0.36 | 0.62 | 3 | 3 b | NS | 6bNS |
| Tamaulipas | Nuevo Laredo    | 0.81 | 0.48 | 0.38 | 0.56 | 0.29 | 1 | 3 d | LL | 4dLL |
| Tamaulipas | Nuevo Morelos   | 0.48 | 0.42 | 0.41 | 0.44 | 0.49 | 2 | 4 d | HL | 6dHL |
| Tamaulipas | Jiménez         | 0.66 | 0.40 | 0.53 | 0.53 | 0.33 | 1 | 3 d | NS | 4dNS |
| Tamaulipas | San Nicolás     | 0.46 | 0.35 | 0.29 | 0.37 | 0.60 | 3 | 3 b | NS | 6bNS |
| Tamaulipas | Soto la Marina  | 0.62 | 0.41 | 0.34 | 0.46 | 0.46 | 2 | 4 d | NS | 6dNS |
| Tamaulipas | Tampico         | 0.86 | 0.51 | 0.48 | 0.62 | 0.19 | 1 | 5 d | NS | 6dNS |
| Tamaulipas | Tula            | 0.55 | 0.34 | 0.38 | 0.42 | 0.52 | 2 | 4 d | NS | 6dNS |
| Tamaulipas | Llera           | 0.50 | 0.38 | 0.35 | 0.41 | 0.54 | 3 | 5 d | HL | 8dHL |
| Tamaulipas | Mainero         | 0.45 | 0.41 | 0.41 | 0.42 | 0.52 | 2 | 4 d | HL | 6dHL |
| Tamaulipas | El Mante        | 0.75 | 0.45 | 0.43 | 0.54 | 0.31 | 1 | 5 d | HL | 6dHL |
| Tamaulipas | Matamoros       | 0.78 | 0.46 | 0.35 | 0.53 | 0.34 | 1 | 4 d | HL | 5dHL |
| Tamaulipas | Méndez          | 0.49 | 0.45 | 0.36 | 0.43 | 0.50 | 2 | 4 d | NS | 6dNS |
| Tamaulipas | Mier            | 0.77 | 0.43 | 0.37 | 0.52 | 0.35 | 1 | 4 d | HL | 5dHL |
| Tamaulipas | Miguel Alemán   | 0.75 | 0.44 | 0.44 | 0.55 | 0.31 | 1 | 4 d | HL | 5dHL |
| Tamaulipas | Ocampo          | 0.55 | 0.38 | 0.67 | 0.53 | 0.33 | 1 | 4 d | NS | 5dNS |
| Tamaulipas | Padilla         | 0.69 | 0.40 | 0.42 | 0.50 | 0.38 | 2 | 4 d | NS | 6dNS |
| Tamaulipas | Palmillas       | 0.45 | 0.38 | 0.37 | 0.40 | 0.56 | 3 | 4 d | NS | 7dNS |

|            |                                 |      |      |      |      |      |   |     |    |      |
|------------|---------------------------------|------|------|------|------|------|---|-----|----|------|
| Tamaulipas | Reynosa                         | 0.81 | 0.49 | 0.35 | 0.55 | 0.30 | 1 | 4 d | HL | 5dHL |
| Tamaulipas | Río Bravo                       | 0.75 | 0.44 | 0.36 | 0.52 | 0.35 | 2 | 4 d | HL | 6dHL |
| Tamaulipas | San Carlos                      | 0.49 | 0.36 | 0.34 | 0.40 | 0.56 | 3 | 3 b | NS | 6bNS |
| Tamaulipas | San Fernando                    | 0.67 | 0.38 | 0.37 | 0.47 | 0.43 | 2 | 3 d | NS | 5dNS |
| Tamaulipas | Valle Hermoso                   | 0.71 | 0.42 | 0.75 | 0.63 | 0.17 | 1 | 4 d | HL | 5dHL |
| Tamaulipas | Victoria                        | 0.81 | 0.50 | 0.46 | 0.59 | 0.24 | 1 | 2 d | NS | 3dNS |
| Tamaulipas | Villagrán                       | 0.49 | 0.40 | 0.36 | 0.41 | 0.53 | 2 | 3 d | NS | 5dNS |
| Tamaulipas | Xicoténcatl                     | 0.65 | 0.46 | 0.54 | 0.55 | 0.31 | 1 | 4 d | NS | 5dNS |
| Tlaxcala   | Amazac de Guerrero              | 0.74 | 0.37 | 0.40 | 0.50 | 0.38 | 2 | 3 d | LL | 5dLL |
| Tlaxcala   | Apetatitlán de Antonio Carvajal | 0.72 | 0.40 | 0.46 | 0.53 | 0.34 | 1 | 3 d | LL | 4dLL |
| Tlaxcala   | Atlangatepec                    | 0.57 | 0.33 | 0.39 | 0.43 | 0.51 | 2 | 5 d | NS | 7dNS |
| Tlaxcala   | Atltzayanca                     | 0.59 | 0.27 | 0.39 | 0.42 | 0.52 | 2 | 3 d | NS | 5dNS |
| Tlaxcala   | Apizaco                         | 0.85 | 0.38 | 0.48 | 0.57 | 0.27 | 1 | 3 d | LL | 4dLL |
| Tlaxcala   | Calpulalpan                     | 0.75 | 0.33 | 0.34 | 0.47 | 0.43 | 2 | 4 d | HL | 6dHL |
| Tlaxcala   | El Carmen                       |      |      |      |      |      |   |     |    |      |
| Tlaxcala   | Tequexquitla                    | 0.76 | 0.24 | 0.38 | 0.46 | 0.45 | 2 | 2 b | NS | 4bNS |
| Tlaxcala   | Cuapiaxtla                      | 0.63 | 0.27 | 0.43 | 0.44 | 0.48 | 2 | 2 b | NS | 4bNS |
| Tlaxcala   | Cuaxomulco                      | 0.67 | 0.32 | 0.39 | 0.46 | 0.45 | 2 | 3 d | LL | 5dLL |
| Tlaxcala   | Chiautempan                     | 0.76 | 0.34 | 0.42 | 0.51 | 0.38 | 2 | 3 d | NS | 5dNS |
| Tlaxcala   | Muñoz de                        |      |      |      |      |      |   |     |    |      |
| Tlaxcala   | Domingo Arenas                  | 0.57 | 0.35 | 0.43 | 0.45 | 0.48 | 2 | 4 d | HL | 6dHL |
| Tlaxcala   | Españita                        | 0.53 | 0.29 | 0.39 | 0.40 | 0.55 | 3 | 3 b | NS | 6bNS |
| Tlaxcala   | Huamantla                       | 0.74 | 0.32 | 0.43 | 0.50 | 0.39 | 2 | 5 d | HL | 7dHL |
| Tlaxcala   | Hueyotlipan                     | 0.69 | 0.28 | 0.40 | 0.46 | 0.46 | 2 | 3 d | NS | 5dNS |
| Tlaxcala   | Ixtacuixtla de Mariano          |      |      |      |      |      |   |     |    |      |
| Tlaxcala   | Matamoros                       | 0.72 | 0.34 | 0.44 | 0.50 | 0.38 | 2 | 3 d | NS | 5dNS |
| Tlaxcala   | Ixtenco                         | 0.83 | 0.29 | 0.41 | 0.51 | 0.37 | 2 | 4 d | NS | 6dNS |
| Tlaxcala   | Mazatecochco de José María      |      |      |      |      |      |   |     |    |      |
| Tlaxcala   | Morelos                         | 0.73 | 0.27 | 0.41 | 0.47 | 0.44 | 2 | 2 b | LL | 4bLL |
| Tlaxcala   | Contla de Juan Cuamatzi         | 0.69 | 0.32 | 0.41 | 0.47 | 0.44 | 2 | 3 d | LL | 5dLL |



|          |                                         |      |      |      |      |      |   |     |    |      |
|----------|-----------------------------------------|------|------|------|------|------|---|-----|----|------|
| Tlaxcala | Xicohtzinco                             | 0.81 | 0.38 | 0.67 | 0.62 | 0.19 | 1 | 3 d | LL | 4dLL |
| Tlaxcala | Yauhquemehcan                           | 0.73 | 0.39 | 0.39 | 0.50 | 0.39 | 2 | 3 d | LL | 5dLL |
| Tlaxcala | Zacatelco                               | 0.79 | 0.35 | 0.37 | 0.50 | 0.39 | 2 | 3 d | LL | 5dLL |
| Tlaxcala | Tepetitla de Lardizábal                 | 0.79 | 0.30 | 0.35 | 0.48 | 0.41 | 2 | 3 d | LL | 5dLL |
| Tlaxcala | Sanctórum de Lázaro Cárdenas            | 0.71 | 0.25 | 0.62 | 0.53 | 0.34 | 1 | 3 d | NS | 4dNS |
| Tlaxcala | Nanacamilpa de Mariano Arista           | 0.73 | 0.31 | 0.48 | 0.51 | 0.38 | 2 | 4 d | NS | 6dNS |
| Tlaxcala | Acuamanala de Miguel Hidalgo            | 0.61 | 0.37 | 0.41 | 0.47 | 0.44 | 2 | 3 d | LL | 5dLL |
| Tlaxcala | Nativitas                               | 0.67 | 0.32 | 0.36 | 0.45 | 0.47 | 2 | 3 d | LL | 5dLL |
| Tlaxcala | Panotla                                 | 0.69 | 0.38 | 0.38 | 0.49 | 0.41 | 2 | 3 d | LL | 5dLL |
| Tlaxcala | San Pablo del Monte                     | 0.78 | 0.30 | 0.39 | 0.49 | 0.40 | 2 | 3 d | LL | 5dLL |
| Tlaxcala | Santa Cruz Tlaxcala                     | 0.76 | 0.36 | 0.54 | 0.55 | 0.30 | 1 | 3 d | NS | 4dNS |
| Tlaxcala | Tenancingo                              | 0.71 | 0.30 | 0.40 | 0.47 | 0.43 | 2 | 3 d | LL | 5dLL |
| Tlaxcala | Teolochocho                             | 0.74 | 0.34 | 0.42 | 0.50 | 0.39 | 2 | 3 d | NS | 5dNS |
| Tlaxcala | Tepeyanco                               | 0.61 | 0.38 | 0.60 | 0.53 | 0.34 | 1 | 3 d | LL | 4dLL |
| Tlaxcala | Terrenate                               | 0.67 | 0.27 | 0.43 | 0.46 | 0.46 | 2 | 3 d | NS | 5dNS |
| Tlaxcala | Tetla de la Solidaridad                 | 0.76 | 0.34 | 0.41 | 0.50 | 0.38 | 2 | 3 d | LL | 5dLL |
| Tlaxcala | Tetlatlahuca                            | 0.73 | 0.33 | 0.38 | 0.48 | 0.42 | 2 | 3 d | LL | 5dLL |
| Tlaxcala | Tlaxcala                                | 0.82 | 0.43 | 0.46 | 0.57 | 0.27 | 1 | 3 d | LL | 4dLL |
| Tlaxcala | Tlaxco                                  | 0.61 | 0.28 | 0.39 | 0.43 | 0.51 | 2 | 4 d | NS | 6dNS |
| Tlaxcala | Tocatlán                                | 0.73 | 0.28 | 0.42 | 0.47 | 0.43 | 2 | 4 d | HL | 6dHL |
| Tlaxcala | Totolac                                 | 0.62 | 0.41 | 0.40 | 0.48 | 0.43 | 2 | 3 d | LL | 5dLL |
| Tlaxcala | Ziltlaltépec de Trinidad Sánchez Santos | 0.67 | 0.24 | 0.37 | 0.43 | 0.51 | 2 | 4 d | NS | 6dNS |
| Tlaxcala | Tzompantepec                            | 0.67 | 0.36 | 0.39 | 0.47 | 0.43 | 2 | 3 d | LL | 5dLL |
| Tlaxcala | Xaloztoc                                | 0.75 | 0.32 | 0.63 | 0.57 | 0.28 | 1 | 3 d | LL | 4dLL |
| Tlaxcala | Xaltocan                                | 0.57 | 0.34 | 0.39 | 0.43 | 0.50 | 2 | 3 d | NS | 5dNS |

|          |                              |      |      |      |      |      |   |     |    |      |
|----------|------------------------------|------|------|------|------|------|---|-----|----|------|
| Tlaxcala | Papalotla de Xicohténcatl    | 0.80 | 0.34 | 0.72 | 0.62 | 0.19 | 1 | 3 d | NS | 4dNS |
| Tlaxcala | Benito Juárez                | 0.74 | 0.24 | 0.41 | 0.46 | 0.45 | 2 | 3 d | NS | 5dNS |
| Tlaxcala | Emiliano Zapata              | 0.61 | 0.23 | 0.41 | 0.42 | 0.53 | 2 | 2 b | NS | 4bNS |
| Tlaxcala | Lázaro Cárdenas La Magdalena | 0.55 | 0.31 | 0.49 | 0.45 | 0.47 | 2 | 2 b | NS | 4bNS |
| Tlaxcala | Tlaltelulco San Lorenzo      | 0.72 | 0.31 | 0.33 | 0.45 | 0.47 | 2 | 3 d | LL | 5dLL |
| Tlaxcala | Axocomanitla San Lucas       | 0.78 | 0.34 | 0.64 | 0.59 | 0.24 | 1 | 3 d | LL | 4dLL |
| Tlaxcala | Tecopilco San Damián         | 0.64 | 0.27 | 0.41 | 0.44 | 0.49 | 2 | 4 d | NS | 6dNS |
| Tlaxcala | Texóloc San Francisco        | 0.83 | 0.33 | 0.52 | 0.56 | 0.29 | 1 | 3 d | LL | 4dLL |
| Tlaxcala | Tetlanohcan San Jerónimo     | 0.73 | 0.30 | 0.39 | 0.47 | 0.43 | 2 | 3 d | NS | 5dNS |
| Tlaxcala | Zacualpan                    | 0.76 | 0.33 | 0.74 | 0.61 | 0.20 | 1 | 3 d | LL | 4dLL |
| Tlaxcala | San José Teacalco San Juan   | 0.74 | 0.25 | 0.75 | 0.58 | 0.26 | 1 | 4 d | HL | 5dHL |
| Tlaxcala | Huactzinco Santa Ana         | 0.74 | 0.31 | 0.35 | 0.46 | 0.45 | 2 | 3 d | LL | 5dLL |
| Tlaxcala | Nopalucan Santa Apolonia     | 0.80 | 0.28 | 0.64 | 0.57 | 0.26 | 1 | 3 d | NS | 4dNS |
| Tlaxcala | Teacalco Santa Catarina      | 0.79 | 0.31 | 0.53 | 0.54 | 0.32 | 1 | 3 d | LL | 4dLL |
| Tlaxcala | Ayometla Santa Cruz          | 0.78 | 0.31 | 0.49 | 0.53 | 0.34 | 1 | 3 d | LL | 4dLL |
| Tlaxcala | Quilehtla Santa Isabel       | 0.72 | 0.28 | 0.43 | 0.48 | 0.43 | 2 | 3 d | LL | 5dLL |
| Tlaxcala | Xiloxotla                    | 0.73 | 0.29 | 0.38 | 0.47 | 0.44 | 2 | 3 d | LL | 5dLL |
| Veracruz | Acajete                      | 0.40 | 0.35 | 0.42 | 0.39 | 0.57 | 3 | 3 b | NS | 6bNS |
| Veracruz | Acatlán                      | 0.60 | 0.28 | 0.51 | 0.46 | 0.45 | 2 | 3 d | NS | 5dNS |
| Veracruz | Acayucan                     | 0.64 | 0.35 | 0.42 | 0.47 | 0.44 | 2 | 4 d | NS | 6dNS |
| Veracruz | Actopan                      | 0.46 | 0.41 | 0.56 | 0.48 | 0.43 | 2 | 4 d | NS | 6dNS |
| Veracruz | Acuña                        | 0.51 | 0.38 | 0.32 | 0.40 | 0.55 | 3 | 3 b | NS | 6bNS |
| Veracruz | Acultzingo                   | 0.49 | 0.32 | 0.39 | 0.40 | 0.55 | 3 | 2 v | NS | 5vNS |

|          |                                  |      |      |      |      |      |   |     |    |      |
|----------|----------------------------------|------|------|------|------|------|---|-----|----|------|
| Veracruz | Camarón de Tejada                | 0.40 | 0.36 | 0.42 | 0.39 | 0.57 | 3 | 5 d | NS | 8dNS |
| Veracruz | Alpatláhuac                      | 0.36 | 0.28 | 0.38 | 0.34 | 0.65 | 3 | 2 v | NS | 5vNS |
| Veracruz | Alto Lucero de Gutiérrez Barrios | 0.49 | 0.34 | 0.47 | 0.43 | 0.50 | 2 | 3 d | NS | 5dNS |
| Veracruz | Altotonga                        | 0.48 | 0.31 | 0.37 | 0.39 | 0.58 | 3 | 3 b | NS | 6bNS |
| Veracruz | Alvarado                         | 0.65 | 0.43 | 0.38 | 0.49 | 0.41 | 2 | 4 d | NS | 6dNS |
| Veracruz | Amatitlán                        | 0.38 | 0.42 | 0.28 | 0.36 | 0.62 | 3 | 4 d | NS | 7dNS |
| Veracruz | Naranjos Amatlán                 | 0.63 | 0.44 | 0.37 | 0.48 | 0.42 | 2 | 4 d | NS | 6dNS |
| Veracruz | Amatlán de los Reyes             | 0.56 | 0.39 | 0.38 | 0.44 | 0.48 | 2 | 4 d | NS | 6dNS |
| Veracruz | Angel R. Cabada                  | 0.48 | 0.38 | 0.44 | 0.43 | 0.50 | 2 | 4 d | NS | 6dNS |
| Veracruz | La Antigua                       | 0.72 | 0.45 | 0.63 | 0.60 | 0.22 | 1 | 5 d | HL | 6dHL |
| Veracruz | Apazapan                         | 0.43 | 0.39 | 0.47 | 0.43 | 0.51 | 2 | 5 d | NS | 7dNS |
| Veracruz | Aquila                           | 0.35 | 0.26 | 0.37 | 0.33 | 0.68 | 3 | 2 v | NS | 5vNS |
| Veracruz | Astacinga                        | 0.23 | 0.25 | 0.34 | 0.28 | 0.76 | 4 | 3 v | LH | 7vLH |
| Veracruz | Atlahuilco                       | 0.29 | 0.27 | 0.28 | 0.28 | 0.75 | 4 | 2 v | NS | 6vNS |
| Veracruz | Atoyac                           | 0.60 | 0.37 | 0.42 | 0.46 | 0.45 | 2 | 4 d | NS | 6dNS |
| Veracruz | Atzacan                          | 0.57 | 0.32 | 0.48 | 0.45 | 0.47 | 2 | 2 b | LL | 4bLL |
| Veracruz | Atzalan                          | 0.37 | 0.30 | 0.38 | 0.35 | 0.63 | 3 | 3 b | NS | 6bNS |
| Veracruz | Tlaltetela                       | 0.42 | 0.31 | 0.48 | 0.40 | 0.55 | 3 | 3 b | NS | 6bNS |
| Veracruz | Ayahualulco                      | 0.38 | 0.27 | 0.48 | 0.38 | 0.59 | 3 | 2 v | NS | 5vNS |
| Veracruz | Banderilla                       | 0.69 | 0.43 | 0.48 | 0.53 | 0.33 | 1 | 2 d | NS | 3dNS |
| Veracruz | Benito Juárez                    | 0.31 | 0.29 | 0.25 | 0.28 | 0.75 | 4 | 4 b | HH | 8bHH |
| Veracruz | Boca del Río                     | 0.74 | 0.49 | 0.50 | 0.58 | 0.26 | 1 | 5 d | HL | 6dHL |
| Veracruz | Calcahualco                      | 0.32 | 0.25 | 0.42 | 0.33 | 0.67 | 3 | 2 v | NS | 5vNS |
| Veracruz | Camerino Z. Mendoza              | 0.63 | 0.41 | 0.47 | 0.50 | 0.38 | 2 | 2 b | NS | 4bNS |
| Veracruz | Carrillo Puerto                  | 0.40 | 0.33 | 0.40 | 0.38 | 0.59 | 3 | 5 d | NS | 8dNS |
| Veracruz | Catemaco                         | 0.50 | 0.33 | 0.46 | 0.43 | 0.50 | 2 | 3 d | NS | 5dNS |
| Veracruz | Cazones de Herrera               | 0.46 | 0.32 | 0.30 | 0.36 | 0.62 | 3 | 5 d | NS | 8dNS |
| Veracruz | Cerro Azul                       | 0.65 | 0.41 | 0.50 | 0.52 | 0.35 | 1 | 4 d | NS | 5dNS |
| Veracruz | Citlaltépetl                     | 0.43 | 0.29 | 0.36 | 0.36 | 0.62 | 3 | 4 d | NS | 7dNS |

|          |                           |      |      |      |      |      |   |     |    |      |
|----------|---------------------------|------|------|------|------|------|---|-----|----|------|
| Veracruz | Coacoatzintla             | 0.56 | 0.31 | 0.48 | 0.45 | 0.47 | 2 | 2 b | NS | 4bNS |
| Veracruz | Coahuatlán                | 0.38 | 0.27 | 0.43 | 0.36 | 0.62 | 3 | 4 d | NS | 7dNS |
| Veracruz | Coatepec                  | 0.73 | 0.44 | 0.50 | 0.56 | 0.29 | 1 | 2 d | NS | 3dNS |
| Veracruz | Coatzacoalcos             | 0.71 | 0.46 | 0.48 | 0.55 | 0.30 | 1 | 4 d | NS | 5dNS |
| Veracruz | Coatzintla                | 0.62 | 0.45 | 0.45 | 0.50 | 0.38 | 2 | 5 d | NS | 7dNS |
| Veracruz | Coetzala                  | 0.35 | 0.34 | 0.38 | 0.35 | 0.63 | 3 | 4 d | NS | 7dNS |
| Veracruz | Colipa                    | 0.46 | 0.34 | 0.38 | 0.39 | 0.57 | 3 | 2 v | NS | 5vNS |
| Veracruz | Comapa                    | 0.40 | 0.28 | 0.35 | 0.34 | 0.65 | 3 | 4 d | NS | 7dNS |
| Veracruz | Córdoba                   | 0.74 | 0.44 | 0.47 | 0.55 | 0.30 | 1 | 3 d | NS | 4dNS |
| Veracruz | Cosamaloapan de<br>Carpio | 0.62 | 0.43 | 0.43 | 0.49 | 0.40 | 2 | 5 d | NS | 7dNS |
| Veracruz | Cosautlán de<br>Carvajal  | 0.48 | 0.31 | 0.49 | 0.43 | 0.51 | 2 | 3 d | NS | 5dNS |
| Veracruz | Coscomatepec              | 0.51 | 0.29 | 0.45 | 0.42 | 0.53 | 2 | 2 b | NS | 4bNS |
| Veracruz | Cosoleacaque              | 0.62 | 0.44 | 0.38 | 0.48 | 0.42 | 2 | 4 d | HL | 6dHL |
| Veracruz | Cotaxtla                  | 0.43 | 0.39 | 0.38 | 0.40 | 0.55 | 3 | 5 d | NS | 8dNS |
| Veracruz | Coxquihui                 | 0.36 | 0.29 | 0.25 | 0.30 | 0.72 | 4 | 4 b | HH | 8bHH |
| Veracruz | Coyutla                   | 0.43 | 0.29 | 0.38 | 0.37 | 0.61 | 3 | 5 d | HH | 8dHH |
| Veracruz | Cuichapa                  | 0.59 | 0.38 | 0.49 | 0.49 | 0.41 | 2 | 4 d | NS | 6dNS |
| Veracruz | Cuitláhuac                | 0.54 | 0.40 | 0.39 | 0.44 | 0.48 | 2 | 5 d | NS | 7dNS |
| Veracruz | Chacaltianguis            | 0.47 | 0.39 | 0.39 | 0.42 | 0.53 | 2 | 4 d | NS | 6dNS |
| Veracruz | Chalma                    | 0.43 | 0.34 | 0.23 | 0.33 | 0.67 | 3 | 4 d | HH | 7dHH |
| Veracruz | Chiconamel                | 0.38 | 0.30 | 0.17 | 0.29 | 0.74 | 4 | 4 b | NS | 8bNS |
| Veracruz | Chiconquiaco              | 0.40 | 0.27 | 0.36 | 0.34 | 0.65 | 3 | 2 v | NS | 5vNS |
| Veracruz | Chicontepec               | 0.38 | 0.30 | 0.24 | 0.31 | 0.71 | 3 | 4 d | HH | 7dHH |
| Veracruz | Chinameca                 | 0.53 | 0.38 | 0.37 | 0.43 | 0.51 | 2 | 5 d | NS | 7dNS |
| Veracruz | Chinampa de<br>Gorostiza  | 0.51 | 0.34 | 0.26 | 0.37 | 0.61 | 3 | 4 d | NS | 7dNS |
| Veracruz | Las Choapas               | 0.50 | 0.34 | 0.29 | 0.38 | 0.59 | 3 | 3 b | NS | 6bNS |
| Veracruz | Chocamán                  | 0.55 | 0.33 | 0.46 | 0.45 | 0.48 | 2 | 2 b | NS | 4bNS |
| Veracruz | Chontla                   | 0.43 | 0.33 | 0.37 | 0.38 | 0.59 | 3 | 4 d | NS | 7dNS |
| Veracruz | Isla                      | 0.59 | 0.37 | 0.41 | 0.46 | 0.46 | 2 | 4 d | NS | 6dNS |
| Veracruz | Ixcatepec                 | 0.46 | 0.30 | 0.33 | 0.36 | 0.61 | 3 | 5 d | NS | 8dNS |

|          |                       |      |      |      |      |      |   |     |    |      |
|----------|-----------------------|------|------|------|------|------|---|-----|----|------|
| Veracruz | Ixhuacán de los Reyes | 0.35 | 0.29 | 0.48 | 0.37 | 0.60 | 3 | 3 b | NS | 6bNS |
| Veracruz | Ixhuatlán del Café    | 0.51 | 0.30 | 0.40 | 0.41 | 0.54 | 3 | 3 b | NS | 6bNS |
| Veracruz | Ixhuatlancillo        | 0.57 | 0.39 | 0.42 | 0.46 | 0.45 | 2 | 2 b | LL | 4bLL |
| Veracruz | Ixhuatlán del Sureste | 0.60 | 0.39 | 0.31 | 0.43 | 0.50 | 2 | 4 d | NS | 6dNS |
| Veracruz | Ixhuatlán de Madero   | 0.33 | 0.28 | 0.30 | 0.30 | 0.72 | 4 | 4 b | HH | 8bHH |
| Veracruz | Ixmatlahuacan         | 0.34 | 0.42 | 0.32 | 0.36 | 0.62 | 3 | 3 b | NS | 6bNS |
| Veracruz | Ixtaczoquitlán        | 0.59 | 0.42 | 0.49 | 0.50 | 0.39 | 2 | 2 b | NS | 4bNS |
| Veracruz | Jalacingo             | 0.45 | 0.30 | 0.44 | 0.40 | 0.56 | 3 | 4 d | NS | 7dNS |
| Veracruz | Xalapa                | 0.67 | 0.47 | 0.53 | 0.56 | 0.29 | 1 | 2 d | NS | 3dNS |
| Veracruz | Jalcomulco            | 0.48 | 0.31 | 0.49 | 0.43 | 0.51 | 2 | 3 d | NS | 5dNS |
| Veracruz | Chumatlán             | 0.30 | 0.27 | 0.30 | 0.29 | 0.74 | 4 | 4 b | NS | 8bNS |
| Veracruz | Emiliano Zapata       | 0.56 | 0.46 | 0.50 | 0.51 | 0.38 | 2 | 3 d | NS | 5dNS |
| Veracruz | Espinal               | 0.46 | 0.30 | 0.27 | 0.34 | 0.65 | 3 | 5 d | NS | 8dNS |
| Veracruz | Filomeno Mata         | 0.48 | 0.25 | 0.35 | 0.36 | 0.62 | 3 | 4 d | HH | 7dHH |
| Veracruz | Fortín                | 0.68 | 0.44 | 0.47 | 0.53 | 0.33 | 1 | 3 d | NS | 4dNS |
| Veracruz | Gutiérrez Zamora      | 0.57 | 0.38 | 0.35 | 0.43 | 0.50 | 2 | 4 d | NS | 6dNS |
| Veracruz | Hidalgotitlán         | 0.41 | 0.31 | 0.22 | 0.31 | 0.70 | 3 | 4 d | NS | 7dNS |
| Veracruz | Huatusco              | 0.56 | 0.35 | 0.48 | 0.46 | 0.45 | 2 | 3 d | NS | 5dNS |
| Veracruz | Huayacocotla          | 0.46 | 0.32 | 0.38 | 0.39 | 0.58 | 3 | 3 b | NS | 6bNS |
| Veracruz | Hueyapan de Ocampo    | 0.42 | 0.33 | 0.41 | 0.39 | 0.58 | 3 | 3 b | NS | 6bNS |
| Veracruz | Jáltipan              | 0.59 | 0.37 | 0.35 | 0.44 | 0.49 | 2 | 5 d | NS | 7dNS |
| Veracruz | Jamapa                | 0.50 | 0.40 | 0.37 | 0.43 | 0.51 | 2 | 5 d | NS | 7dNS |
| Veracruz | Jesús Carranza        | 0.45 | 0.35 | 0.32 | 0.37 | 0.60 | 3 | 5 d | NS | 8dNS |
| Veracruz | Xico                  | 0.65 | 0.33 | 0.49 | 0.49 | 0.40 | 2 | 3 d | NS | 5dNS |
| Veracruz | Jilotepec             | 0.60 | 0.39 | 0.43 | 0.47 | 0.43 | 2 | 3 d | LL | 5dLL |
| Veracruz | Juan Rodríguez Clara  | 0.57 | 0.34 | 0.41 | 0.44 | 0.48 | 2 | 3 d | NS | 5dNS |
| Veracruz | Juchique de Ferrer    | 0.40 | 0.32 | 0.44 | 0.39 | 0.57 | 3 | 2 v | NS | 5vNS |
| Veracruz | Landero y Coss        | 0.40 | 0.29 | 0.47 | 0.39 | 0.58 | 3 | 2 v | NS | 5vNS |
| Veracruz | Lerdo de Tejada       | 0.68 | 0.43 | 0.48 | 0.53 | 0.33 | 1 | 4 d | NS | 5dNS |

|          |                                             |      |      |      |      |      |   |     |    |      |
|----------|---------------------------------------------|------|------|------|------|------|---|-----|----|------|
| Veracruz | Omealca                                     | 0.48 | 0.35 | 0.46 | 0.43 | 0.50 | 2 | 5 d | NS | 7dNS |
| Veracruz | Orizaba                                     | 0.78 | 0.47 | 0.51 | 0.59 | 0.24 | 1 | 2 d | NS | 3dNS |
| Veracruz | Huiloapan de<br>Cuauhtémoc                  | 0.55 | 0.41 | 0.48 | 0.48 | 0.41 | 2 | 2 b | NS | 4bNS |
| Veracruz | Ignacio de la Llave                         | 0.48 | 0.33 | 0.26 | 0.36 | 0.62 | 3 | 4 d | NS | 7dNS |
| Veracruz | Ilamatlán                                   | 0.24 | 0.26 | 0.19 | 0.23 | 0.84 | 4 | 3 v | LH | 7vLH |
| Veracruz | Magdalena                                   | 0.34 | 0.28 | 0.51 | 0.38 | 0.59 | 3 | 3 b | NS | 6bNS |
| Veracruz | Maltrata                                    | 0.57 | 0.31 | 0.40 | 0.42 | 0.51 | 2 | 2 b | NS | 4bNS |
| Veracruz | Manlio Fabio<br>Altamirano                  | 0.50 | 0.39 | 0.43 | 0.44 | 0.49 | 2 | 5 d | HL | 7dHL |
| Veracruz | Mariano Escobedo<br>Martínez de la<br>Torre | 0.57 | 0.35 | 0.47 | 0.46 | 0.45 | 2 | 2 b | NS | 4bNS |
| Veracruz | Mecatlán                                    | 0.70 | 0.40 | 0.40 | 0.50 | 0.39 | 2 | 5 d | NS | 7dNS |
| Veracruz | Mecayapan                                   | 0.36 | 0.25 | 0.32 | 0.31 | 0.70 | 3 | 4 d | HH | 7dHH |
| Veracruz | Medellín de Bravo                           | 0.44 | 0.27 | 0.40 | 0.37 | 0.61 | 3 | 4 d | NS | 7dNS |
| Veracruz | Miahuatlán                                  | 0.66 | 0.45 | 0.38 | 0.50 | 0.39 | 2 | 5 d | NS | 7dNS |
| Veracruz | Misantla                                    | 0.55 | 0.27 | 0.49 | 0.44 | 0.49 | 2 | 3 d | NS | 5dNS |
| Veracruz | Mixtla de<br>Altamirano                     | 0.50 | 0.34 | 0.38 | 0.41 | 0.54 | 3 | 2 v | NS | 5vNS |
| Veracruz | Moloacán                                    | 0.21 | 0.25 | 0.22 | 0.23 | 0.84 | 4 | 4 b | HH | 8bHH |
| Veracruz | Naolinco                                    | 0.50 | 0.38 | 0.36 | 0.41 | 0.53 | 2 | 4 d | HL | 6dHL |
| Veracruz | Naranjal                                    | 0.56 | 0.37 | 0.49 | 0.48 | 0.43 | 2 | 3 d | NS | 5dNS |
| Veracruz | Nautla                                      | 0.38 | 0.35 | 0.41 | 0.38 | 0.59 | 3 | 4 d | NS | 7dNS |
| Veracruz | Nogales                                     | 0.47 | 0.36 | 0.32 | 0.38 | 0.58 | 3 | 4 d | NS | 7dNS |
| Veracruz | Otatitlán                                   | 0.60 | 0.38 | 0.50 | 0.49 | 0.40 | 2 | 2 b | LL | 4bLL |
| Veracruz | Oteapan                                     | 0.65 | 0.36 | 0.44 | 0.49 | 0.41 | 2 | 5 d | NS | 7dNS |
| Veracruz | Ozuluama de<br>Mascareñas                   | 0.65 | 0.32 | 0.24 | 0.40 | 0.55 | 3 | 5 d | NS | 8dNS |
| Veracruz | Pajapan                                     | 0.44 | 0.38 | 0.28 | 0.37 | 0.61 | 3 | 4 d | NS | 7dNS |
| Veracruz | Pánuco                                      | 0.46 | 0.29 | 0.44 | 0.39 | 0.56 | 3 | 4 d | NS | 7dNS |
| Veracruz | Papantla                                    | 0.62 | 0.40 | 0.36 | 0.46 | 0.46 | 2 | 5 d | HL | 7dHL |
| Veracruz | Paso del Macho                              | 0.55 | 0.36 | 0.28 | 0.40 | 0.56 | 3 | 5 d | NS | 8dNS |
| Veracruz | Paso de Ovejas                              | 0.50 | 0.38 | 0.42 | 0.44 | 0.49 | 2 | 5 d | NS | 7dNS |
| Veracruz |                                             | 0.57 | 0.40 | 0.52 | 0.50 | 0.39 | 2 | 5 d | HL | 7dHL |

|          |                                          |      |      |      |      |      |   |     |    |      |
|----------|------------------------------------------|------|------|------|------|------|---|-----|----|------|
| Veracruz | La Perla                                 | 0.38 | 0.26 | 0.45 | 0.36 | 0.62 | 3 | 2 v | NS | 5vNS |
| Veracruz | Perote                                   | 0.60 | 0.35 | 0.47 | 0.47 | 0.43 | 2 | 2 b | NS | 4bNS |
| Veracruz | Platón Sánchez                           | 0.50 | 0.32 | 0.44 | 0.42 | 0.52 | 2 | 5 d | HH | 7dHH |
| Veracruz | Playa Vicente<br>Poza Rica de<br>Hidalgo | 0.47 | 0.32 | 0.31 | 0.37 | 0.61 | 3 | 4 d | NS | 7dNS |
| Veracruz | Las Minas                                | 0.73 | 0.47 | 0.47 | 0.55 | 0.30 | 1 | 5 d | NS | 6dNS |
| Veracruz | Minatitlán                               | 0.34 | 0.27 | 0.36 | 0.32 | 0.68 | 3 | 4 d | NS | 7dNS |
| Veracruz | Oluta                                    | 0.65 | 0.43 | 0.38 | 0.49 | 0.41 | 2 | 4 d | NS | 6dNS |
| Veracruz | Las Vigas de<br>Ramírez                  | 0.64 | 0.35 | 0.31 | 0.43 | 0.50 | 2 | 4 d | NS | 6dNS |
| Veracruz | Pueblo Viejo                             | 0.55 | 0.31 | 0.41 | 0.42 | 0.51 | 2 | 5 d | NS | 7dNS |
| Veracruz | Puerto Nacional                          | 0.65 | 0.39 | 0.35 | 0.46 | 0.45 | 2 | 4 d | HL | 6dHL |
| Veracruz | Rafael Delgado                           | 0.51 | 0.40 | 0.51 | 0.47 | 0.43 | 2 | 5 d | NS | 7dNS |
| Veracruz | Rafael Lucio                             | 0.58 | 0.32 | 0.48 | 0.46 | 0.46 | 2 | 2 b | NS | 4bNS |
| Veracruz | Los Reyes                                | 0.56 | 0.37 | 0.46 | 0.47 | 0.44 | 2 | 2 b | NS | 4bNS |
| Veracruz | Tempoal                                  | 0.27 | 0.27 | 0.28 | 0.27 | 0.77 | 4 | 3 v | LH | 7vLH |
| Veracruz | Tenampa                                  | 0.52 | 0.34 | 0.31 | 0.39 | 0.57 | 3 | 5 d | NS | 8dNS |
| Veracruz | Tenochtitlán                             | 0.37 | 0.32 | 0.41 | 0.36 | 0.61 | 3 | 3 b | NS | 6bNS |
| Veracruz | Teocelo                                  | 0.40 | 0.29 | 0.47 | 0.39 | 0.58 | 3 | 2 v | NS | 5vNS |
| Veracruz | Tepatlaxco                               | 0.58 | 0.35 | 0.50 | 0.48 | 0.42 | 2 | 3 d | NS | 5dNS |
| Veracruz | Tepetlán                                 | 0.37 | 0.30 | 0.20 | 0.29 | 0.74 | 4 | 4 b | NS | 8bNS |
| Veracruz | Tepetzintla                              | 0.42 | 0.33 | 0.49 | 0.41 | 0.53 | 2 | 2 b | NS | 4bNS |
| Veracruz | Tequila                                  | 0.48 | 0.31 | 0.45 | 0.42 | 0.53 | 2 | 4 d | NS | 6dNS |
| Veracruz | Río Blanco                               | 0.37 | 0.27 | 0.33 | 0.32 | 0.68 | 3 | 3 b | NS | 6bNS |
| Veracruz | Saltabarranca                            | 0.77 | 0.44 | 0.51 | 0.58 | 0.26 | 1 | 2 d | NS | 3dNS |
| Veracruz | José Azueta                              | 0.47 | 0.42 | 0.43 | 0.44 | 0.49 | 2 | 4 d | NS | 6dNS |
| Veracruz | Texcatepec                               | 0.54 | 0.33 | 0.33 | 0.40 | 0.55 | 3 | 5 d | NS | 8dNS |
| Veracruz | Texhuacán                                | 0.22 | 0.25 | 0.27 | 0.25 | 0.81 | 4 | 4 b | HH | 8bHH |
| Veracruz | Texistepec                               | 0.33 | 0.28 | 0.32 | 0.31 | 0.70 | 3 | 3 b | LH | 6bLH |
| Veracruz | Tezonapa                                 | 0.54 | 0.31 | 0.24 | 0.36 | 0.62 | 3 | 4 d | NS | 7dNS |
| Veracruz | Tierra Blanca                            | 0.42 | 0.31 | 0.24 | 0.32 | 0.68 | 3 | 5 d | NS | 8dNS |
| Veracruz | Tihuatlán                                | 0.56 | 0.41 | 0.38 | 0.45 | 0.47 | 2 | 5 d | NS | 7dNS |
| Veracruz |                                          | 0.54 | 0.36 | 0.21 | 0.37 | 0.61 | 3 | 5 d | NS | 8dNS |

|          |                   |      |      |      |      |      |   |     |    |      |
|----------|-------------------|------|------|------|------|------|---|-----|----|------|
| Veracruz | Tlacojalpan       | 0.59 | 0.35 | 0.38 | 0.44 | 0.49 | 2 | 5 d | NS | 7dNS |
| Veracruz | San Andrés        |      |      |      |      |      |   |     |    |      |
| Veracruz | Tenejapan         | 0.39 | 0.30 | 0.42 | 0.37 | 0.61 | 3 | 2 v | NS | 5vNS |
| Veracruz | San Andrés Tuxtla | 0.57 | 0.34 | 0.45 | 0.45 | 0.47 | 2 | 3 d | NS | 5dNS |
| Veracruz | San Juan          |      |      |      |      |      |   |     |    |      |
| Veracruz | Evangelista       | 0.51 | 0.33 | 0.32 | 0.39 | 0.58 | 3 | 3 b | NS | 6bNS |
| Veracruz | Santiago Tuxtla   | 0.42 | 0.33 | 0.41 | 0.39 | 0.57 | 3 | 3 b | NS | 6bNS |
| Veracruz | Sayula de Alemán  | 0.48 | 0.32 | 0.33 | 0.38 | 0.59 | 3 | 4 d | NS | 7dNS |
| Veracruz | Soconusco         | 0.60 | 0.40 | 0.40 | 0.47 | 0.44 | 2 | 4 d | NS | 6dNS |
| Veracruz | Sochiapa          | 0.43 | 0.33 | 0.49 | 0.41 | 0.53 | 2 | 3 d | NS | 5dNS |
| Veracruz | Soledad Atzompa   | 0.36 | 0.25 | 0.40 | 0.34 | 0.66 | 3 | 2 v | NS | 5vNS |
| Veracruz | Soledad de        |      |      |      |      |      |   |     |    |      |
| Veracruz | Doblado           | 0.52 | 0.35 | 0.44 | 0.44 | 0.49 | 2 | 5 d | NS | 7dNS |
| Veracruz | Sotepan           | 0.38 | 0.27 | 0.47 | 0.37 | 0.60 | 3 | 4 d | NS | 7dNS |
| Veracruz | Tamalín           | 0.56 | 0.33 | 0.34 | 0.41 | 0.54 | 3 | 4 d | NS | 7dNS |
| Veracruz | Tamiahua          | 0.45 | 0.34 | 0.16 | 0.32 | 0.69 | 3 | 4 d | NS | 7dNS |
| Veracruz | Tampico Alto      | 0.46 | 0.39 | 0.22 | 0.35 | 0.63 | 3 | 4 d | NS | 7dNS |
| Veracruz | Tancoco           | 0.42 | 0.34 | 0.36 | 0.37 | 0.60 | 3 | 4 d | NS | 7dNS |
| Veracruz | Tantima           | 0.44 | 0.35 | 0.28 | 0.36 | 0.63 | 3 | 4 d | NS | 7dNS |
| Veracruz | Tantoyuca         | 0.48 | 0.31 | 0.20 | 0.33 | 0.67 | 3 | 5 d | NS | 8dNS |
| Veracruz | Tatatila          | 0.35 | 0.28 | 0.34 | 0.32 | 0.68 | 3 | 4 d | NS | 7dNS |
| Veracruz | Castillo de Teayo | 0.42 | 0.33 | 0.26 | 0.33 | 0.66 | 3 | 4 d | NS | 7dNS |
| Veracruz | Tecolutla         | 0.46 | 0.35 | 0.26 | 0.35 | 0.63 | 3 | 4 d | NS | 7dNS |
| Veracruz | Tehuipango        | 0.22 | 0.24 | 0.23 | 0.23 | 0.84 | 4 | 3 v | LH | 7vLH |
| Veracruz | Álamo Temapache   | 0.51 | 0.32 | 0.32 | 0.38 | 0.59 | 3 | 4 d | NS | 7dNS |
| Veracruz | Tlacolulan        | 0.36 | 0.31 | 0.33 | 0.33 | 0.67 | 3 | 2 v | NS | 5vNS |
| Veracruz | Tlacotalpan       | 0.54 | 0.40 | 0.37 | 0.43 | 0.50 | 2 | 4 d | NS | 6dNS |
| Veracruz | Tlacotepec de     |      |      |      |      |      |   |     |    |      |
| Veracruz | Mejía             | 0.41 | 0.33 | 0.46 | 0.40 | 0.56 | 3 | 4 d | NS | 7dNS |
| Veracruz | Tlachichilco      | 0.35 | 0.28 | 0.31 | 0.31 | 0.70 | 3 | 4 d | HH | 7dHH |
| Veracruz | Tlaxicoyan        | 0.48 | 0.37 | 0.39 | 0.41 | 0.53 | 2 | 5 d | NS | 7dNS |
| Veracruz | Tlalnahuayocan    | 0.50 | 0.37 | 0.47 | 0.45 | 0.47 | 2 | 2 b | LL | 4bLL |
| Veracruz | Tlapacoyan        | 0.58 | 0.35 | 0.47 | 0.47 | 0.44 | 2 | 4 d | NS | 6dNS |
| Veracruz | Tlaquilpa         | 0.31 | 0.26 | 0.40 | 0.32 | 0.68 | 3 | 3 b | LH | 6bLH |





|         |                  |      |      |      |      |      |   |     |    |      |
|---------|------------------|------|------|------|------|------|---|-----|----|------|
| Yucatan | Abalá            | 0.40 | 0.36 | 0.76 | 0.51 | 0.38 | 2 | 2 b | LL | 4bLL |
| Yucatan | Acanceh          | 0.63 | 0.36 | 0.77 | 0.59 | 0.24 | 1 | 2 d | LL | 3dLL |
| Yucatan | Akil             | 0.64 | 0.27 | 0.90 | 0.61 | 0.21 | 1 | 5 d | HL | 6dHL |
| Yucatan | Baca             | 0.61 | 0.37 | 0.75 | 0.58 | 0.26 | 1 | 3 d | LL | 4dLL |
| Yucatan | Bokobá           | 0.40 | 0.41 | 0.74 | 0.52 | 0.36 | 2 | 3 d | LL | 5dLL |
| Yucatan | Buctzotz         | 0.62 | 0.26 | 0.73 | 0.54 | 0.33 | 1 | 3 d | LL | 4dLL |
| Yucatan | Chacsinkín       | 0.45 | 0.21 | 0.76 | 0.47 | 0.44 | 2 | 5 d | HL | 7dHL |
| Yucatan | Chankom          | 0.38 | 0.23 | 0.75 | 0.45 | 0.46 | 2 | 3 d | NS | 5dNS |
| Yucatan | Chapab           | 0.39 | 0.33 | 0.75 | 0.49 | 0.40 | 2 | 4 d | HL | 6dHL |
| Yucatan | Chemax           | 0.46 | 0.23 | 0.73 | 0.48 | 0.43 | 2 | 4 d | HL | 6dHL |
| Yucatan | Cacalchén        | 0.65 | 0.33 | 0.74 | 0.57 | 0.27 | 1 | 3 d | LL | 4dLL |
| Yucatan | Calotmul         | 0.54 | 0.23 | 0.76 | 0.51 | 0.37 | 2 | 4 d | HL | 6dHL |
| Yucatan | Cansahcab        | 0.65 | 0.32 | 0.73 | 0.56 | 0.28 | 1 | 3 d | LL | 4dLL |
| Yucatan | Cantamayec       | 0.31 | 0.27 | 0.75 | 0.44 | 0.48 | 2 | 5 d | HL | 7dHL |
| Yucatan | Celestún         | 0.69 | 0.25 | 0.74 | 0.56 | 0.28 | 1 | 2 d | LL | 3dLL |
| Yucatan | Cenotillo        | 0.64 | 0.23 | 0.76 | 0.55 | 0.31 | 1 | 3 d | NS | 4dNS |
| Yucatan | Conkal           | 0.68 | 0.42 | 0.70 | 0.60 | 0.22 | 1 | 3 d | LL | 4dLL |
| Yucatan | Cuncunul         | 0.34 | 0.31 | 0.77 | 0.47 | 0.43 | 2 | 3 d | NS | 5dNS |
| Yucatan | Cuzamá           | 0.59 | 0.29 | 0.75 | 0.54 | 0.32 | 1 | 3 d | LL | 4dLL |
| Yucatan | Chicxulub Pueblo | 0.70 | 0.34 | 0.74 | 0.59 | 0.23 | 1 | 3 d | LL | 4dLL |
| Yucatan | Chichimilá       | 0.53 | 0.22 | 0.74 | 0.50 | 0.39 | 2 | 3 d | NS | 5dNS |
| Yucatan | Chikindzonot     | 0.46 | 0.20 | 0.74 | 0.47 | 0.44 | 2 | 3 d | NS | 5dNS |
| Yucatan | Chocholá         | 0.63 | 0.34 | 0.75 | 0.57 | 0.26 | 1 | 2 d | LL | 3dLL |
| Yucatan | Chumayel         | 0.59 | 0.22 | 0.78 | 0.53 | 0.34 | 1 | 5 d | HL | 6dHL |
| Yucatan | Mayapán          | 0.46 | 0.21 | 0.86 | 0.51 | 0.37 | 2 | 5 d | HL | 7dHL |
| Yucatan | Mérida           | 0.81 | 0.46 | 0.76 | 0.68 | 0.09 | 1 | 3 d | LL | 4dLL |
| Yucatan | Dzán             | 0.61 | 0.23 | 0.77 | 0.54 | 0.33 | 1 | 5 d | HL | 6dHL |
| Yucatan | Dzemul           | 0.60 | 0.34 | 0.69 | 0.54 | 0.31 | 1 | 3 d | LL | 4dLL |
| Yucatan | Dzidzantún       | 0.70 | 0.34 | 0.68 | 0.57 | 0.26 | 1 | 3 d | LL | 4dLL |
| Yucatan | Dzilam de Bravo  | 0.49 | 0.36 | 0.71 | 0.52 | 0.35 | 2 | 3 d | LL | 5dLL |
| Yucatan | Dzilam González  | 0.67 | 0.28 | 0.71 | 0.55 | 0.30 | 1 | 3 d | LL | 4dLL |
| Yucatan | Dzitás           | 0.55 | 0.23 | 0.74 | 0.51 | 0.37 | 2 | 3 d | LL | 5dLL |
| Yucatan | Dzoncauich       | 0.36 | 0.29 | 0.70 | 0.45 | 0.47 | 2 | 3 d | LL | 5dLL |

|         |              |      |      |      |      |      |   |     |    |      |
|---------|--------------|------|------|------|------|------|---|-----|----|------|
| Yucatan | Espita       | 0.60 | 0.26 | 0.76 | 0.54 | 0.33 | 1 | 4 d | HL | 5dHL |
| Yucatan | Halachó      | 0.55 | 0.31 | 0.71 | 0.52 | 0.35 | 1 | 2 d | LL | 3dLL |
| Yucatan | Hocabá       | 0.56 | 0.29 | 0.76 | 0.54 | 0.33 | 1 | 3 d | LL | 4dLL |
| Yucatan | Hoctún       | 0.55 | 0.29 | 0.76 | 0.53 | 0.33 | 1 | 3 d | LL | 4dLL |
| Yucatan | Homún        | 0.62 | 0.28 | 0.74 | 0.55 | 0.31 | 1 | 4 d | HL | 5dHL |
| Yucatan | Huhí         | 0.67 | 0.25 | 0.73 | 0.55 | 0.30 | 1 | 4 d | HL | 5dHL |
| Yucatan | Hunucmá      | 0.74 | 0.32 | 0.68 | 0.58 | 0.25 | 1 | 2 d | LL | 3dLL |
| Yucatan | Ixil         | 0.66 | 0.34 | 0.73 | 0.58 | 0.26 | 1 | 3 d | LL | 4dLL |
| Yucatan | Izamal       | 0.63 | 0.34 | 0.75 | 0.57 | 0.27 | 1 | 3 d | NS | 4dNS |
| Yucatan | Kanasín      | 0.74 | 0.40 | 0.74 | 0.62 | 0.18 | 1 | 3 d | LL | 4dLL |
| Yucatan | Kantunil     | 0.53 | 0.26 | 0.75 | 0.51 | 0.36 | 2 | 3 d | LL | 5dLL |
| Yucatan | Opichén      | 0.63 | 0.26 | 0.76 | 0.55 | 0.31 | 1 | 3 d | LL | 4dLL |
| Yucatan | Oxkutzcab    | 0.60 | 0.29 | 0.75 | 0.55 | 0.31 | 1 | 5 d | HL | 6dHL |
| Yucatan | Panabá       | 0.61 | 0.27 | 0.81 | 0.56 | 0.28 | 1 | 4 d | HL | 5dHL |
| Yucatan | Peto         | 0.63 | 0.26 | 0.76 | 0.55 | 0.31 | 1 | 5 d | NS | 6dNS |
| Yucatan | Kaua         | 0.40 | 0.25 | 0.75 | 0.47 | 0.44 | 2 | 3 d | NS | 5dNS |
| Yucatan | Progreso     | 0.69 | 0.39 | 0.77 | 0.61 | 0.20 | 1 | 3 d | LL | 4dLL |
| Yucatan | Kinchil      | 0.62 | 0.28 | 0.69 | 0.53 | 0.34 | 1 | 2 d | LL | 3dLL |
| Yucatan | Kopomá       | 0.45 | 0.38 | 0.75 | 0.52 | 0.35 | 1 | 2 d | LL | 3dLL |
| Yucatan | Mama         | 0.63 | 0.24 | 0.78 | 0.55 | 0.30 | 1 | 5 d | HL | 6dHL |
| Yucatan | Maní         | 0.58 | 0.25 | 0.76 | 0.53 | 0.34 | 1 | 5 d | HL | 6dHL |
| Yucatan | Maxcanú      | 0.61 | 0.37 | 0.76 | 0.58 | 0.26 | 1 | 2 d | LL | 3dLL |
| Yucatan | Mocochá      | 0.51 | 0.43 | 0.79 | 0.58 | 0.26 | 1 | 3 d | LL | 4dLL |
| Yucatan | Motul        | 0.63 | 0.37 | 0.74 | 0.58 | 0.25 | 1 | 3 d | LL | 4dLL |
| Yucatan | Muna         | 0.66 | 0.30 | 0.76 | 0.57 | 0.26 | 1 | 3 d | LL | 4dLL |
| Yucatan | Muxupip      | 0.45 | 0.37 | 0.77 | 0.53 | 0.34 | 1 | 3 d | LL | 4dLL |
| Yucatan | Quintana Roo | 0.38 | 0.28 | 0.76 | 0.47 | 0.43 | 2 | 3 d | NS | 5dNS |
| Yucatan | Río Lagartos | 0.49 | 0.43 | 0.77 | 0.56 | 0.29 | 1 | 4 d | HL | 5dHL |
| Yucatan | Sacalum      | 0.61 | 0.29 | 0.78 | 0.56 | 0.28 | 1 | 3 d | LL | 4dLL |
| Yucatan | Sanahcat     | 0.40 | 0.35 | 0.79 | 0.51 | 0.37 | 2 | 3 d | LL | 5dLL |
| Yucatan | San Felipe   | 0.51 | 0.44 | 0.76 | 0.57 | 0.27 | 1 | 4 d | HL | 5dHL |
| Yucatan | Samahil      | 0.50 | 0.35 | 0.75 | 0.53 | 0.33 | 1 | 2 d | LL | 3dLL |
| Yucatan | Santa Elena  | 0.62 | 0.24 | 0.76 | 0.54 | 0.32 | 1 | 3 d | LL | 4dLL |

|         |                  |      |      |      |      |      |   |     |    |      |
|---------|------------------|------|------|------|------|------|---|-----|----|------|
| Yucatan | Seyé             | 0.63 | 0.29 | 0.71 | 0.54 | 0.31 | 1 | 3 d | LL | 4dLL |
| Yucatan | Ucú              | 0.55 | 0.36 | 0.69 | 0.53 | 0.33 | 1 | 3 d | LL | 4dLL |
| Yucatan | Umán             | 0.65 | 0.40 | 0.74 | 0.60 | 0.22 | 1 | 2 d | LL | 3dLL |
| Yucatan | Valladolid       | 0.65 | 0.33 | 0.74 | 0.57 | 0.26 | 1 | 3 d | NS | 4dNS |
| Yucatan | Xocchel          | 0.61 | 0.26 | 0.76 | 0.55 | 0.31 | 1 | 3 d | LL | 4dLL |
| Yucatan | Yaxcabá          | 0.40 | 0.27 | 0.73 | 0.47 | 0.44 | 2 | 4 d | NS | 6dNS |
| Yucatan | Sinanché         | 0.53 | 0.30 | 0.74 | 0.52 | 0.35 | 1 | 3 d | LL | 4dLL |
| Yucatan | Sotuta           | 0.53 | 0.26 | 0.75 | 0.51 | 0.37 | 2 | 4 d | HL | 6dHL |
| Yucatan | Sucilá           | 0.63 | 0.27 | 0.75 | 0.55 | 0.30 | 1 | 4 d | HL | 5dHL |
| Yucatan | Sudzal           | 0.37 | 0.32 | 0.74 | 0.48 | 0.43 | 2 | 3 d | NS | 5dNS |
| Yucatan | Suma             | 0.47 | 0.38 | 0.77 | 0.54 | 0.32 | 1 | 3 d | LL | 4dLL |
| Yucatan | Tahdziú          | 0.50 | 0.20 | 0.74 | 0.48 | 0.42 | 2 | 5 d | HL | 7dHL |
| Yucatan | Tahmek           | 0.65 | 0.30 | 0.78 | 0.58 | 0.26 | 1 | 3 d | LL | 4dLL |
| Yucatan | Teabo            | 0.62 | 0.23 | 0.75 | 0.53 | 0.33 | 1 | 5 d | HL | 6dHL |
| Yucatan | Tecoh            | 0.53 | 0.34 | 0.75 | 0.54 | 0.32 | 1 | 3 d | LL | 4dLL |
| Yucatan | Tekal de Venegas | 0.46 | 0.24 | 0.74 | 0.48 | 0.42 | 2 | 3 d | LL | 5dLL |
| Yucatan | Tekantó          | 0.60 | 0.29 | 0.73 | 0.54 | 0.32 | 1 | 3 d | LL | 4dLL |
| Yucatan | Tekax            | 0.60 | 0.30 | 0.75 | 0.55 | 0.31 | 1 | 5 d | HL | 6dHL |
| Yucatan | Tekit            | 0.62 | 0.27 | 0.75 | 0.55 | 0.31 | 1 | 5 d | HL | 6dHL |
| Yucatan | Tekom            | 0.41 | 0.21 | 0.77 | 0.46 | 0.45 | 2 | 3 d | NS | 5dNS |
| Yucatan | Telchac Pueblo   | 0.71 | 0.31 | 0.67 | 0.56 | 0.28 | 1 | 3 d | LL | 4dLL |
| Yucatan | Telchac Puerto   | 0.48 | 0.40 | 0.76 | 0.55 | 0.31 | 1 | 3 d | LL | 4dLL |
| Yucatan | Temax            | 0.60 | 0.26 | 0.75 | 0.53 | 0.33 | 1 | 3 d | LL | 4dLL |
| Yucatan | Temozón          | 0.50 | 0.26 | 0.73 | 0.50 | 0.39 | 2 | 4 d | HL | 6dHL |
| Yucatan | Tepakán          | 0.39 | 0.36 | 0.72 | 0.49 | 0.41 | 2 | 3 d | LL | 5dLL |
| Yucatan | Tetiz            | 0.59 | 0.29 | 0.70 | 0.53 | 0.34 | 1 | 2 d | LL | 3dLL |
| Yucatan | Teya             | 0.35 | 0.33 | 0.70 | 0.46 | 0.45 | 2 | 3 d | LL | 5dLL |
| Yucatan | Ticul            | 0.68 | 0.32 | 0.76 | 0.59 | 0.24 | 1 | 5 d | HL | 6dHL |
| Yucatan | Timucuy          | 0.52 | 0.31 | 0.77 | 0.54 | 0.33 | 1 | 2 d | LL | 3dLL |
| Yucatan | Tinum            | 0.49 | 0.31 | 0.76 | 0.52 | 0.36 | 2 | 3 d | NS | 5dNS |
| Yucatan | Tixcacalcupul    | 0.46 | 0.20 | 0.75 | 0.47 | 0.43 | 2 | 3 d | NS | 5dNS |
| Yucatan | Tixkokob         | 0.61 | 0.40 | 0.77 | 0.59 | 0.23 | 1 | 3 d | LL | 4dLL |
| Yucatan | Tixmehuac        | 0.39 | 0.24 | 0.75 | 0.46 | 0.45 | 2 | 5 d | HL | 7dHL |

|           |                                 |      |      |      |      |      |   |     |    |      |
|-----------|---------------------------------|------|------|------|------|------|---|-----|----|------|
| Yucatan   | Tixpéhual                       | 0.60 | 0.40 | 0.77 | 0.59 | 0.24 | 1 | 3 d | LL | 4dLL |
| Yucatan   | Tizimín                         | 0.61 | 0.30 | 0.73 | 0.55 | 0.30 | 1 | 4 d | HL | 5dHL |
| Yucatan   | Tunkás                          | 0.56 | 0.24 | 0.75 | 0.52 | 0.36 | 2 | 3 d | NS | 5dNS |
| Yucatan   | Tzucacab                        | 0.55 | 0.25 | 0.75 | 0.52 | 0.36 | 2 | 5 d | HL | 7dHL |
| Yucatan   | Uayma                           | 0.46 | 0.21 | 0.77 | 0.48 | 0.42 | 2 | 3 d | LL | 5dLL |
| Yucatan   | Yaxkukul                        | 0.65 | 0.33 | 0.72 | 0.57 | 0.27 | 1 | 3 d | LL | 4dLL |
| Yucatan   | Yobaín                          | 0.44 | 0.38 | 0.75 | 0.52 | 0.35 | 2 | 3 d | LL | 5dLL |
| Zacatecas | Apozol                          | 0.55 | 0.20 | 0.45 | 0.40 | 0.55 | 3 | 5 d | NS | 8dNS |
| Zacatecas | Apulco                          | 0.46 | 0.18 | 0.38 | 0.34 | 0.65 | 3 | 4 d | NS | 7dNS |
| Zacatecas | Atolinga                        | 0.42 | 0.21 | 0.43 | 0.35 | 0.63 | 3 | 5 d | NS | 8dNS |
| Zacatecas | Benito Juárez                   | 0.51 | 0.16 | 0.44 | 0.37 | 0.61 | 3 | 5 d | NS | 8dNS |
| Zacatecas | Calera                          | 0.81 | 0.23 | 0.49 | 0.51 | 0.37 | 2 | 4 d | NS | 6dNS |
| Zacatecas | Cañitas de Felipe<br>Pescador   | 0.62 | 0.18 | 0.36 | 0.39 | 0.57 | 3 | 5 d | NS | 8dNS |
| Zacatecas | Concepción del<br>Oro           | 0.62 | 0.28 | 0.32 | 0.41 | 0.54 | 3 | 4 d | NS | 7dNS |
| Zacatecas | Cuauhtémoc                      | 0.64 | 0.18 | 0.48 | 0.43 | 0.50 | 2 | 5 d | NS | 7dNS |
| Zacatecas | Chalchihuites                   | 0.53 | 0.18 | 0.38 | 0.36 | 0.62 | 3 | 4 d | NS | 7dNS |
| Zacatecas | Fresnillo                       | 0.71 | 0.24 | 0.39 | 0.45 | 0.48 | 2 | 4 d | NS | 6dNS |
| Zacatecas | Trinidad García de<br>la Cadena | 0.45 | 0.23 | 0.44 | 0.37 | 0.60 | 3 | 5 d | NS | 8dNS |
| Zacatecas | Genaro Codina                   | 0.43 | 0.16 | 0.40 | 0.33 | 0.67 | 3 | 5 d | HL | 8dHL |
| Zacatecas | El Plateado de<br>Joaquín Amaro | 0.40 | 0.16 | 0.38 | 0.32 | 0.69 | 3 | 5 d | NS | 8dNS |
| Zacatecas | General Pánfilo<br>Natera       | 0.56 | 0.15 | 0.35 | 0.35 | 0.63 | 3 | 5 d | NS | 8dNS |
| Zacatecas | Guadalupe                       | 0.75 | 0.31 | 0.45 | 0.50 | 0.38 | 2 | 5 d | NS | 7dNS |
| Zacatecas | Huanusco                        | 0.45 | 0.23 | 0.34 | 0.34 | 0.65 | 3 | 5 d | NS | 8dNS |
| Zacatecas | Jalpa                           | 0.60 | 0.23 | 0.37 | 0.40 | 0.56 | 3 | 5 d | NS | 8dNS |
| Zacatecas | Jerez                           | 0.72 | 0.22 | 0.46 | 0.46 | 0.45 | 2 | 4 d | NS | 6dNS |
| Zacatecas | Jiménez del Teul                | 0.42 | 0.14 | 0.42 | 0.32 | 0.68 | 3 | 5 d | NS | 8dNS |
| Zacatecas | Juan Aldama                     | 0.69 | 0.18 | 0.49 | 0.45 | 0.47 | 2 | 4 d | NS | 6dNS |
| Zacatecas | Juchipila                       | 0.58 | 0.25 | 0.44 | 0.42 | 0.51 | 2 | 5 d | NS | 7dNS |
| Zacatecas | Loreto                          | 0.67 | 0.22 | 0.34 | 0.41 | 0.54 | 3 | 4 d | NS | 7dNS |

|           |                              |      |      |      |      |      |   |     |    |      |
|-----------|------------------------------|------|------|------|------|------|---|-----|----|------|
| Zacatecas | Luis Moya                    | 0.57 | 0.22 | 0.47 | 0.42 | 0.52 | 2 | 5 d | NS | 7dNS |
| Zacatecas | Mazapil                      | 0.47 | 0.20 | 0.30 | 0.32 | 0.68 | 3 | 4 d | HH | 7dHH |
| Zacatecas | Melchor Ocampo               | 0.51 | 0.19 | 0.47 | 0.39 | 0.57 | 3 | 5 d | NS | 8dNS |
| Zacatecas | Mezquital del Oro            | 0.41 | 0.17 | 0.25 | 0.28 | 0.76 | 4 | 5 d | NS | 9dNS |
| Zacatecas | Miguel Auza                  | 0.60 | 0.16 | 0.33 | 0.36 | 0.62 | 3 | 5 d | NS | 8dNS |
| Zacatecas | Momax                        | 0.45 | 0.23 | 0.44 | 0.37 | 0.60 | 3 | 5 d | NS | 8dNS |
| Zacatecas | Monte Escobedo               | 0.58 | 0.19 | 0.34 | 0.37 | 0.60 | 3 | 5 d | NS | 8dNS |
| Zacatecas | Morelos                      | 0.74 | 0.27 | 0.48 | 0.50 | 0.39 | 2 | 5 d | NS | 7dNS |
| Zacatecas | Moyahua de Estrada           | 0.43 | 0.23 | 0.37 | 0.34 | 0.65 | 3 | 5 d | NS | 8dNS |
| Zacatecas | Nochistlán de Mejía          | 0.57 | 0.21 | 0.37 | 0.38 | 0.58 | 3 | 5 d | NS | 8dNS |
| Zacatecas | Noria de Ángeles             | 0.44 | 0.17 | 0.42 | 0.34 | 0.65 | 3 | 4 d | NS | 7dNS |
| Zacatecas | Ojocaliente                  | 0.62 | 0.18 | 0.43 | 0.41 | 0.53 | 2 | 5 d | NS | 7dNS |
| Zacatecas | Pánuco                       | 0.63 | 0.18 | 0.41 | 0.41 | 0.54 | 3 | 5 d | NS | 8dNS |
| Zacatecas | Pinos                        | 0.48 | 0.14 | 0.36 | 0.33 | 0.67 | 3 | 4 d | NS | 7dNS |
| Zacatecas | Río Grande                   | 0.61 | 0.21 | 0.39 | 0.40 | 0.55 | 3 | 4 d | NS | 7dNS |
| Zacatecas | Sain Alto                    | 0.49 | 0.15 | 0.33 | 0.32 | 0.68 | 3 | 5 d | NS | 8dNS |
| Zacatecas | Trancoso                     | 0.64 | 0.17 | 0.34 | 0.38 | 0.58 | 3 | 5 d | NS | 8dNS |
| Zacatecas | General Enrique Estrada      | 0.63 | 0.22 | 0.37 | 0.41 | 0.54 | 3 | 4 d | NS | 7dNS |
| Zacatecas | General Francisco R. Murguía | 0.55 | 0.15 | 0.31 | 0.34 | 0.66 | 3 | 5 d | NS | 8dNS |
| Zacatecas | El Salvador                  | 0.39 | 0.14 | 0.32 | 0.28 | 0.75 | 4 | 4 b | NS | 8bNS |
| Zacatecas | Sombrerete                   | 0.58 | 0.24 | 0.46 | 0.43 | 0.51 | 2 | 5 d | NS | 7dNS |
| Zacatecas | Susticacán                   | 0.42 | 0.19 | 0.48 | 0.36 | 0.62 | 3 | 5 d | NS | 8dNS |
| Zacatecas | Tabasco                      | 0.50 | 0.19 | 0.43 | 0.37 | 0.60 | 3 | 5 d | NS | 8dNS |
| Zacatecas | Tepechitlán                  | 0.60 | 0.19 | 0.44 | 0.41 | 0.54 | 3 | 5 d | NS | 8dNS |
| Zacatecas | Tepetongo                    | 0.43 | 0.22 | 0.43 | 0.36 | 0.62 | 3 | 5 d | NS | 8dNS |
| Zacatecas | Teúl de González Ortega      | 0.57 | 0.22 | 0.45 | 0.41 | 0.53 | 2 | 5 d | NS | 7dNS |
| Zacatecas | Tlaltenango de Sánchez Román | 0.66 | 0.21 | 0.41 | 0.43 | 0.51 | 2 | 5 d | NS | 7dNS |
| Zacatecas | Valparaíso                   | 0.59 | 0.17 | 0.32 | 0.36 | 0.62 | 3 | 4 d | NS | 7dNS |
| Zacatecas | Vetagrande                   | 0.60 | 0.21 | 0.35 | 0.39 | 0.58 | 3 | 5 d | NS | 8dNS |

|           |                   |      |      |      |      |      |   |     |    |      |
|-----------|-------------------|------|------|------|------|------|---|-----|----|------|
| Zacatecas | Villa de Cos      | 0.56 | 0.17 | 0.43 | 0.39 | 0.58 | 3 | 5 d | NS | 8dNS |
| Zacatecas | Villa García      | 0.56 | 0.22 | 0.35 | 0.37 | 0.60 | 3 | 4 d | NS | 7dNS |
|           | Villa González    |      |      |      |      |      |   |     |    |      |
| Zacatecas | Ortega            | 0.61 | 0.17 | 0.40 | 0.39 | 0.57 | 3 | 5 d | NS | 8dNS |
| Zacatecas | Villa Hidalgo     | 0.50 | 0.14 | 0.45 | 0.36 | 0.61 | 3 | 4 d | NS | 7dNS |
| Zacatecas | Villanueva        | 0.60 | 0.19 | 0.46 | 0.42 | 0.52 | 2 | 5 d | NS | 7dNS |
| Zacatecas | Zacatecas         | 0.78 | 0.32 | 0.42 | 0.51 | 0.37 | 2 | 5 d | NS | 7dNS |
|           | Santa María de la |      |      |      |      |      |   |     |    |      |
| Zacatecas | Paz               | 0.51 | 0.21 | 0.42 | 0.38 | 0.59 | 3 | 5 d | NS | 8dNS |
